# Supplementary material for: Comparative Transcriptomics of the Saprobic and Parasitic Growth Phases in Coccidioides spp
Source: PubMed Central journal article supplement (PMC3401177; doi:10.1371/journal.pone.0041034), 2012-07-20
Supplement: pone.0041034.s001.pdf [file pone.0041034.s001.pdf]

**Table S1: All genes up-regulated in saprobic phase**

| BROAD ID   | <i>C. immitis</i><br>H/S | <i>C. immitis</i><br>p-value | <i>C. posadasii</i><br>H/S | <i>C. posadasii</i><br>p-value | Gene description                                                                     | Previous Studies |
|------------|--------------------------|------------------------------|----------------------------|--------------------------------|--------------------------------------------------------------------------------------|------------------|
| CIMG_00035 | 12.29                    | 8.39E-79                     | 2.27                       | 9.55E-07                       | 3-hydroxyisobutyrate dehydrogenase                                                   |                  |
| CIMG_00039 | 3.17                     | 5.12E-13                     | 1.96                       | 0.00035                        | conserved hypothetical protein                                                       |                  |
| CIMG_00043 | 2.62                     | 1.05E-09                     | 1.79                       | 0.00119                        | dynactin Arp1 p25 subunit                                                            |                  |
| CIMG_00044 | 2.30                     | 1.08E-10                     | 2.87                       | 7.97E-10                       | ADP-ribosylation factor 6                                                            |                  |
| CIMG_00065 | 2.56                     | 3.24E-11                     | 1.80                       | 0.00107                        | Mis12-Mtw1 domain-containing protein                                                 |                  |
| CIMG_00067 | 3.02                     | 1.59E-10                     | 1.39                       | 0.03698                        | conserved hypothetical protein (hosphotransferase enzyme family)                     |                  |
| CIMG_00078 | 1.82                     | 0.00014                      | 2.74                       | 3.25E-09                       | conserved hypothetical protein                                                       |                  |
| CIMG_00080 | 2.01                     | 2.15E-08                     | 8.23                       | 1.04E-24                       | TAM domain methyltransferase                                                         |                  |
| CIMG_00090 | 1.64                     | 0.00035                      | 1.59                       | 0.00110                        | LRP16 family protein                                                                 |                  |
| CIMG_00093 | 2.65                     | 4.96E-14                     | 1.85                       | 0.00052                        | glycolipid transfer protein HET-C2                                                   |                  |
| CIMG_00099 | 40.63                    | 2.37E-103                    | 65.14                      | 7.19E-84                       | C2H2 zinc finger domain-containing protein                                           |                  |
| CIMG_00104 | 7.23                     | 0.00002                      | 3.03                       | 0.00241                        | conserved hypothetical protein                                                       | *                |
| CIMG_00107 | 2.03                     | 1.75E-06                     | 1.70                       | 0.00287                        | conserved hypothetical protein                                                       |                  |
| CIMG_00108 | 1.92                     | 1.42E-06                     | 4.41                       | 5.86E-21                       | sulfate transporter                                                                  |                  |
| CIMG_00110 | 4.66                     | 5.98E-35                     | 1.88                       | 0.00009                        | potassium ion channel Yvc1                                                           |                  |
| CIMG_00113 | 1.31                     | 0.04877                      | 2.27                       | 2.45E-07                       | glutamyl-tRNA synthetase                                                             |                  |
| CIMG_00121 | 2.09                     | 3.73E-07                     | 3.02                       | 2.14E-13                       | MFS alpha-gluco-side transporter                                                     |                  |
| CIMG_00146 | 2.31                     | 5.42E-10                     | 7.82                       | 7.15E-20                       | conserved hypothetical protein                                                       |                  |
| CIMG_00152 | 2.20                     | 3.89E-06                     | 2.29                       | 3.05E-06                       | MFS monocarboxylate transporter                                                      |                  |
| CIMG_00185 | 2.91                     | 3.72E-17                     | 3.28                       | 1.61E-12                       | inositol-3-phosphate synthase                                                        |                  |
| CIMG_00189 | 7.30                     | 5.26E-27                     | 14.55                      | 8.74E-28                       | conserved hypothetical protein (LIM domain)                                          |                  |
| CIMG_00202 | 1.56                     | 0.02240                      | 24.89                      | 2.33E-54                       | conserved hypothetical protein                                                       |                  |
| CIMG_00216 | 17.84                    | 3.07E-103                    | 1.74                       | 0.00619                        | copper amine oxidase                                                                 | H                |
| CIMG_00223 | 3.83                     | 3.83E-19                     | 1.89                       | 0.00702                        | FAD synthetase                                                                       |                  |
| CIMG_00236 | 1.97                     | 2.77E-07                     | 2.07                       | 0.00022                        | isopentenyl-diphosphate delta-isomerase                                              |                  |
| CIMG_00245 | 9.92                     | 5.42E-66                     | 5.98                       | 7.55E-15                       | DENN domain-containing protein                                                       |                  |
| CIMG_00246 | 1.90                     | 3.02E-06                     | 2.58                       | 5.95E-06                       | conserved hypothetical protein                                                       |                  |
| CIMG_00290 | 8.23                     | 3.77E-68                     | 4.87                       | 4.93E-21                       | MFS transporter                                                                      |                  |
| CIMG_00291 | 1.47                     | 0.00447                      | 1.48                       | 0.00314                        | Spc97/Spc98 family protein                                                           |                  |
| CIMG_00297 | 1.96                     | 7.09E-07                     | 1.86                       | 0.01127                        | conserved hypothetical protein                                                       |                  |
| CIMG_00302 | 7.52                     | 4.29E-59                     | 4.12                       | 1.21E-12                       | conserved hypothetical protein                                                       | *                |
| CIMG_00304 | 1.59                     | 0.00023                      | 2.01                       | 0.00003                        | importin beta-5 subunit                                                              |                  |
| CIMG_00321 | 1.57                     | 0.00046                      | 1.84                       | 0.00018                        | Prolyl-tRNA synthetase                                                               | *                |
| CIMG_00323 | 2.31                     | 1.32E-06                     | 2.98                       | 1.09E-08                       | WD domain-containing protein                                                         |                  |
| CIMG_00328 | 5.67                     | 7.98E-16                     | 1.67                       | 0.00654                        | urease accessory protein UreD                                                        |                  |
| CIMG_00329 | 2.06                     | 4.42E-09                     | 1.64                       | 0.00343                        | nuclear cohesin complex subunit                                                      |                  |
| CIMG_00338 | 4.29                     | 7.80E-09                     | 1.54                       | 0.00346                        | polysaccharide deacetylase                                                           | *                |
| CIMG_00345 | 1.70                     | 0.03204                      | 14.86                      | 1.02E-50                       | carbohydrate-binding protein                                                         |                  |
| CIMG_00346 | 1.37                     | 0.04742                      | 1.65                       | 0.00139                        | phosphatidylinositol:UDP-GlcNAc transferase PIG-C                                    |                  |
| CIMG_00366 | 4.99                     | 1.73E-25                     | 1.82                       | 0.00085                        | annexin ANXC4                                                                        |                  |
| CIMG_00367 | 2.18                     | 1.08E-08                     | 9.50                       | 4.24E-31                       | Sep4b                                                                                |                  |
| CIMG_00372 | 1.45                     | 0.00885                      | 2.33                       | 7.59E-07                       | conserved hypothetical protein (Dopa 4,5-dioxygenase family)                         |                  |
| CIMG_00374 | 2.42                     | 1.62E-09                     | 4.43                       | 9.59E-18                       | conserved hypothetical protein                                                       |                  |
| CIMG_00383 | 1.37                     | 0.03407                      | 1.92                       | 0.00017                        | RRM domain-containing protein                                                        |                  |
| CIMG_00385 | 1.54                     | 0.00282                      | 1.32                       | 0.03032                        | WD repeat protein                                                                    |                  |
| CIMG_00389 | 7.44                     | 4.01E-52                     | 4.70                       | 4.67E-15                       | conserved hypothetical protein                                                       |                  |
| CIMG_00390 | 14.62                    | 1.84E-42                     | 9.52                       | 1.40E-19                       | conserved hypothetical protein                                                       |                  |
| CIMG_00400 | 10.35                    | 8.59E-75                     | 2.34                       | 0.00059                        | UMTA (methyltransferase)                                                             |                  |
| CIMG_00422 | 1.66                     | 0.00009                      | 2.56                       | 1.52E-08                       | Rac1 GTPase                                                                          |                  |
| CIMG_00438 | 2.01                     | 5.22E-07                     | 1.66                       | 0.01865                        | dolichyl-phosphate-mannose-protein mannosyltransferase                               |                  |
| CIMG_00440 | 2.69                     | 3.98E-16                     | 1.94                       | 0.00025                        | palmitoyltransferase erf2                                                            |                  |
| CIMG_00448 | 1.57                     | 0.00250                      | 16.12                      | 3.93E-41                       | conserved hypothetical protein                                                       |                  |
| CIMG_00457 | 1.99                     | 4.64E-08                     | 1.67                       | 0.00080                        | phosphoserine phosphatase                                                            |                  |
| CIMG_00462 | 2.50                     | 0.00051                      | 2.24                       | 0.00204                        | conserved hypothetical protein                                                       |                  |
| CIMG_00474 | 2.70                     | 4.35E-13                     | 3.10                       | 1.44E-11                       | aminoalcoholphosphotransferase                                                       |                  |
| CIMG_00475 | 1.48                     | 0.00755                      | 2.03                       | 0.00001                        | nipsnap family protein                                                               |                  |
| CIMG_00483 | 2.06                     | 3.17E-07                     | 1.35                       | 0.03727                        | conserved hypothetical protein (Ankyrin repeat)                                      |                  |
| CIMG_00494 | 1.60                     | 0.00612                      | 2.11                       | 0.00005                        | conserved hypothetical protein                                                       |                  |
| CIMG_00513 | 2.20                     | 4.44E-09                     | 3.07                       | 3.68E-08                       | hypothetical protein (linker histone H1 and H5 family)                               |                  |
| CIMG_00522 | 2.70                     | 6.64E-15                     | 9.02                       | 1.75E-36                       | dityrosine transporter A                                                             |                  |
| CIMG_00523 | 1.40                     | 0.00715                      | 9.49                       | 2.45E-30                       | Dit2 protein                                                                         |                  |
| CIMG_00524 | 4.70                     | 6.18E-35                     | 5.08                       | 1.11E-19                       | conserved hypothetical protein (putative pyoverdine/dityrosine biosynthesis protein) |                  |
| CIMG_00529 | 2.29                     | 2.91E-06                     | 14.39                      | 1.80E-53                       | conserved hypothetical protein                                                       |                  |
| CIMG_00536 | 10.48                    | 5.35E-61                     | 9.22                       | 5.20E-28                       | conserved hypothetical protein                                                       | *                |
| CIMG_00548 | 1.43                     | 0.00515                      | 1.33                       | 0.03840                        | chromatin remodeling complex subunit                                                 |                  |
| CIMG_00614 | 3.87                     | 6.16E-23                     | 1.69                       | 0.02009                        | methylmalonate-semialdehyde dehydrogenase                                            |                  |

\*: Predicted secreted;

+: Gene under positive selection [19]; G: Gene gained in *Coccidioides* [19]

H, S: Up-regulated in Hyphae or Spherule by microarray [18]

**Table S1: All genes up-regulated in saprobic phase**

|            |        |           |        |          |                                                                               |   |
|------------|--------|-----------|--------|----------|-------------------------------------------------------------------------------|---|
| CIMG_00621 | 2.16   | 8.01E-09  | 5.82   | 3.79E-18 | histidyl-tRNA synthetase                                                      |   |
| CIMG_00625 | 3.00   | 2.53E-18  | 1.87   | 0.00010  | kex protein                                                                   | * |
| CIMG_00653 | 7.63   | 1.05E-19  | 6.56   | 7.99E-13 | hypothetical protein                                                          |   |
| CIMG_00654 | 11.96  | 6.74E-90  | 14.24  | 2.98E-42 | conserved hypothetical protein                                                |   |
| CIMG_00661 | 1.51   | 0.03058   | 1.64   | 0.00135  | oxidoreductase                                                                |   |
| CIMG_00670 | 2.09   | 5.98E-09  | 1.70   | 0.00032  | MFS multidrug transporter                                                     |   |
| CIMG_00689 | 17.62  | 3.07E-103 | 5.72   | 1.32E-18 | Conserved hypothetical protein (DUF221)                                       |   |
| CIMG_00690 | 1.97   | 0.00013   | 1.78   | 0.00106  | conserved hypothetical protein                                                |   |
| CIMG_00693 | 11.91  | 1.75E-79  | 3.70   | 1.49E-08 | conserved hypothetical protein (CFEM domain)                                  | * |
| CIMG_00694 | 11.54  | 1.46E-80  | 6.30   | 4.18E-19 | siderophore iron transporter                                                  |   |
| CIMG_00695 | 1.59   | 0.00034   | 2.55   | 9.89E-09 | SH3 domain-containing protein                                                 |   |
| CIMG_00711 | 2.68   | 5.09E-15  | 1.86   | 0.00011  | conserved hypothetical protein                                                |   |
| CIMG_00714 | 1.98   | 5.11E-08  | 2.32   | 1.67E-06 | phosphomevalonate kinase                                                      |   |
| CIMG_00716 | 1.35   | 0.03109   | 1.55   | 0.01708  | 20S proteasome maturation protein Ump1                                        |   |
| CIMG_00744 | 1.42   | 0.00910   | 1.54   | 0.03709  | conserved hypothetical protein                                                |   |
| CIMG_00765 | 2.03   | 1.96E-07  | 2.37   | 0.00002  | asparaginyl-tRNA synthetase                                                   |   |
| CIMG_00773 | 2.54   | 1.90E-12  | 11.58  | 4.85E-43 | conserved hypothetical protein                                                |   |
| CIMG_00782 | 3.15   | 2.12E-19  | 7.01   | 1.60E-21 | siderophore iron transporter mirC                                             |   |
| CIMG_00786 | 1.71   | 0.00003   | 1.75   | 0.00493  | cell division control protein 42                                              |   |
| CIMG_00805 | 24.02  | 1.01E-125 | 10.97  | 5.12E-29 | conserved hypothetical protein (putative pre-mRNA-splicing factor cwc15)      |   |
| CIMG_00823 | 4.52   | 1.40E-22  | 2.23   | 1.65E-06 | conserved hypothetical protein                                                |   |
| CIMG_00829 | 2.17   | 2.89E-10  | 3.10   | 2.07E-12 | RING finger membrane protein                                                  |   |
| CIMG_00844 | 5.80   | 8.36E-13  | 3.51   | 8.71E-07 | conserved hypothetical protein                                                |   |
| CIMG_00847 | 2.90   | 4.92E-18  | 3.00   | 2.80E-08 | GTP binding protein                                                           |   |
| CIMG_00855 | 1.55   | 0.00196   | 1.47   | 0.00770  | prenyl cysteine carboxyl methyltransferase Ste14                              |   |
| CIMG_00856 | 12.36  | 2.36E-27  | 7.69   | 3.62E-18 | conserved hypothetical protein                                                |   |
| CIMG_00860 | 1.75   | 0.00001   | 2.18   | 9.62E-07 | diacylglycerol O-acyltransferase                                              |   |
| CIMG_00881 | 3.27   | 3.92E-23  | 20.34  | 1.72E-39 | flotillin domain-containing protein                                           |   |
| CIMG_00904 | 4.40   | 1.17E-34  | 5.81   | 3.62E-19 | cell pattern formation-associated protein                                     |   |
| CIMG_00911 | 1.71   | 0.00003   | 1.88   | 0.00014  | 60S ribosomal protein L19                                                     |   |
| CIMG_00917 | 4.36   | 3.92E-28  | 7.71   | 7.78E-30 | conserved hypothetical protein (fungal Zn(2)-Cys(6) binuclear cluster domain) |   |
| CIMG_00925 | 203.36 | 1.25E-150 | 165.69 | 5.12E-72 | conserved hypothetical protein                                                | * |
| CIMG_00926 | 1.81   | 0.00017   | 6.12   | 3.30E-14 | MFS transporter                                                               |   |
| CIMG_00927 | 11.00  | 2.65E-57  | 9.89   | 1.34E-22 | acyl-CoA synthetase                                                           |   |
| CIMG_00936 | 2.35   | 3.54E-07  | 6.82   | 8.49E-28 | nuclear migration protein                                                     |   |
| CIMG_00940 | 4.59   | 2.03E-32  | 5.08   | 6.86E-19 | protein kinase                                                                |   |
| CIMG_00943 | 4.70   | 2.09E-30  | 2.15   | 0.01024  | L-ornithine 5-monooxygenase                                                   |   |
| CIMG_00947 | 2.15   | 1.71E-07  | 2.44   | 1.14E-06 | conserved hypothetical protein                                                |   |
| CIMG_00948 | 1.69   | 0.00004   | 2.09   | 2.38E-06 | prolidase                                                                     |   |
| CIMG_00949 | 1.56   | 0.00528   | 1.99   | 0.00047  | conserved hypothetical protein (BTB/POZ domain)                               |   |
| CIMG_00951 | 1.38   | 0.01873   | 1.80   | 0.00056  | TOR signaling pathway protein TipA                                            |   |
| CIMG_00970 | 2.93   | 6.13E-06  | 3.60   | 2.60E-06 | conserved hypothetical protein                                                | * |
| CIMG_00972 | 1.83   | 6.31E-06  | 1.70   | 0.00266  | cytoskeletal actin                                                            |   |
| CIMG_00975 | 1.59   | 0.00051   | 1.97   | 0.00067  | DUF907 domain-containing protein                                              | * |
| CIMG_00981 | 2.15   | 4.41E-09  | 1.61   | 0.00331  | NAD-specific glutamate dehydrogenase                                          |   |
| CIMG_00993 | 1.76   | 0.00002   | 2.05   | 0.00009  | pre-mRNA branch site protein p14                                              |   |
| CIMG_00995 | 2.33   | 1.29E-10  | 2.08   | 5.38E-06 | conserved hypothetical protein (putative vacuolar membrane protein)           |   |
| CIMG_00999 | 1.81   | 0.00002   | 1.71   | 0.00197  | SIR2 family histone deacetylase                                               |   |
| CIMG_01004 | 2.67   | 1.31E-15  | 1.59   | 0.01575  | double-strand-break repair protein rad21                                      |   |
| CIMG_01010 | 1.40   | 0.01636   | 3.41   | 1.93E-12 | conserved hypothetical protein (fungal Zn(2)-Cys(6) binuclear cluster domain) |   |
| CIMG_01012 | 2.59   | 1.28E-11  | 1.92   | 0.00028  | riboflavin kinase                                                             |   |
| CIMG_01028 | 4.02   | 1.31E-25  | 2.86   | 6.81E-12 | conserved hypothetical protein                                                |   |
| CIMG_01040 | 1.69   | 0.00019   | 1.22   | 0.00786  | conserved hypothetical protein (DUF258)                                       |   |
| CIMG_01041 | 2.25   | 0.00066   | 1.85   | 0.01139  | conserved hypothetical protein (C2H2 type zinc finger)                        |   |
| CIMG_01045 | 1.63   | 0.00064   | 1.66   | 0.00857  | F-box protein                                                                 |   |
| CIMG_01059 | 1.79   | 6.63E-06  | 1.93   | 9.90E-06 | RecQ family helicase MusN                                                     |   |
| CIMG_01064 | 1.96   | 3.83E-07  | 2.02   | 1.34E-06 | KH domain RNA binding protein                                                 |   |
| CIMG_01096 | 2.03   | 7.00E-09  | 1.56   | 0.00369  | aspartate aminotransferase                                                    |   |
| CIMG_01102 | 10.42  | 1.87E-75  | 6.29   | 7.82E-26 | cell wall glucanase                                                           | * |
| CIMG_01124 | 1.51   | 0.00123   | 1.77   | 0.00557  | ADP-ribosylation factor                                                       |   |
| CIMG_01129 | 5.10   | 5.50E-36  | 2.26   | 4.96E-07 | MFS monocarboxylate transporter                                               |   |
| CIMG_01132 | 3.07   | 7.38E-16  | 1.49   | 0.01526  | Conserved hypothetical protein                                                |   |
| CIMG_01149 | 1.52   | 0.00229   | 1.86   | 0.00039  | DNA lyase                                                                     |   |
| CIMG_01157 | 1.90   | 0.00007   | 1.81   | 0.00182  | conserved hypothetical protein (short chain dehydrogenase)                    |   |
| CIMG_01159 | 1.86   | 1.07E-06  | 1.59   | 0.00087  | general amidase GmdA                                                          |   |
| CIMG_01161 | 2.23   | 6.84E-10  | 2.20   | 4.91E-06 | cell division control protein 2                                               |   |
| CIMG_01166 | 1.42   | 0.00824   | 3.76   | 9.00E-18 | 3-methyl-2-oxobutanoate dehydrogenase                                         |   |
| CIMG_01172 | 1.31   | 0.04891   | 1.46   | 0.01723  | cytomegalovirus gH-receptor family protein                                    |   |
| CIMG_01181 | 2.45   | 2.29E-12  | 69.98  | 9.02E-51 | conserved hypothetical protein (cerato-platanin family)                       | * |
| CIMG_01182 | 16.38  | 9.65E-24  | 160.61 | 8.62E-40 | conserved hypothetical protein (DUF2349)                                      | * |

\*: Predicted secreted;

+: Gene under positive selection [19]; G: Gene gained in *Coccidioides* [19]

H, S: Up-regulated in Hyphae or Spherule by microarray [18]

**Table S1: All genes up-regulated in saprobic phase**

|            |       |           |       |          |                                                                                            |     |
|------------|-------|-----------|-------|----------|--------------------------------------------------------------------------------------------|-----|
| CIMG_01183 | 3.45  | 6.49E-22  | 9.34  | 2.49E-24 | conserved hypothetical protein                                                             |     |
| CIMG_01185 | 12.02 | 3.94E-58  | 8.30  | 1.03E-27 | hypothetical protein                                                                       |     |
| CIMG_01186 | 2.04  | 0.00002   | 1.71  | 0.01420  | conserved hypothetical protein                                                             |     |
| CIMG_01197 | 1.93  | 4.34E-06  | 1.90  | 0.00167  | conserved hypothetical protein (Cytochrome P450)                                           | *   |
| CIMG_01205 | 2.94  | 2.15E-17  | 4.44  | 5.34E-20 | beta-glucosidase 6                                                                         |     |
| CIMG_01236 | 1.77  | 5.07E-06  | 3.82  | 1.08E-15 | serine/threonine kinase PakA                                                               |     |
| CIMG_01242 | 2.60  | 2.96E-11  | 1.76  | 0.00050  | Fe-containing alcohol dehydrogenase                                                        |     |
| CIMG_01246 | 1.99  | 1.07E-07  | 3.92  | 1.57E-10 | PH domain-containing protein                                                               |     |
| CIMG_01248 | 1.37  | 0.01151   | 1.70  | 0.00046  | catabolite repression protein creC                                                         |     |
| CIMG_01252 | 1.55  | 0.00169   | 2.13  | 3.89E-06 | telomere silencing protein Zds1                                                            |     |
| CIMG_01261 | 1.83  | 2.49E-06  | 1.54  | 0.00369  | conserved hypothetical protein                                                             |     |
| CIMG_01266 | 8.00  | 4.58E-59  | 7.43  | 6.12E-25 | alanine aminotransferase                                                                   |     |
| CIMG_01269 | 3.87  | 1.26E-28  | 1.93  | 0.00034  | peroxisomal biogenesis factor PEX11                                                        |     |
| CIMG_01271 | 1.48  | 0.00339   | 1.53  | 0.03819  | conserved hypothetical protein (fungal Zn(2)-Cys(6) binuclear cluster domain)              |     |
| CIMG_01279 | 3.58  | 4.50E-24  | 1.89  | 0.00088  | conserved hypothetical protein                                                             |     |
| CIMG_01303 | 7.02  | 4.65E-33  | 9.13  | 7.63E-23 | BYS1 domain-containing protein                                                             | * H |
| CIMG_01304 | 1.64  | 0.00027   | 1.94  | 0.00070  | GDP-mannose pyrophosphorylase A                                                            |     |
| CIMG_01308 | 13.23 | 1.09E-18  | 2.29  | 0.00002  | conserved hypothetical protein                                                             |     |
| CIMG_01313 | 2.88  | 4.88E-13  | 4.57  | 1.80E-17 | fumarylacetoacetase                                                                        |     |
| CIMG_01314 | 2.72  | 3.10E-10  | 2.89  | 3.24E-08 | maleylacetoacetate isomerase                                                               |     |
| CIMG_01317 | 3.44  | 3.70E-20  | 3.52  | 9.41E-13 | adenosylmethionine-8-amino-7-oxononanoate transaminase                                     |     |
| CIMG_01328 | 3.23  | 7.22E-12  | 6.08  | 6.11E-28 | monooxygenase                                                                              |     |
| CIMG_01340 | 2.89  | 3.44E-13  | 3.50  | 5.00E-14 | conserved hypothetical protein (PHD finger, transcription factor S-II domain, SPOC domain) |     |
| CIMG_01344 | 1.53  | 0.00101   | 1.45  | 0.00278  | ubiquitin-protein ligase Ufd4                                                              |     |
| CIMG_01346 | 1.35  | 0.02475   | 2.01  | 0.00007  | nicotinamide mononucleotide adenylyl transferase                                           |     |
| CIMG_01348 | 1.63  | 0.00008   | 2.05  | 0.00103  | phosphoserine phosphatase                                                                  |     |
| CIMG_01353 | 2.43  | 8.37E-11  | 3.47  | 2.71E-14 | sugar isomerase                                                                            |     |
| CIMG_01357 | 1.70  | 0.00017   | 1.75  | 0.00001  | 2-oxoisovalerate dehydrogenase alpha subunit                                               |     |
| CIMG_01360 | 1.94  | 5.21E-06  | 2.01  | 0.00002  | cellular morphogenesis protein                                                             |     |
| CIMG_01361 | 3.40  | 2.69E-23  | 2.94  | 1.54E-08 | 5'-methylthioadenosine phosphorylase                                                       |     |
| CIMG_01363 | 7.15  | 2.20E-39  | 4.60  | 1.37E-18 | beta-glucosidase                                                                           | * H |
| CIMG_01375 | 1.50  | 0.00331   | 1.95  | 0.00077  | eukaryotic peptide chain release factor GTP-binding subunit                                |     |
| CIMG_01376 | 1.94  | 3.94E-06  | 1.98  | 0.00008  | pre-rRNA processing protein                                                                |     |
| CIMG_01383 | 2.35  | 6.59E-11  | 3.06  | 2.58E-09 | Ser/Thr protein phosphatase                                                                |     |
| CIMG_01413 | 3.26  | 6.28E-22  | 2.47  | 2.29E-08 | ribulose-phosphate 3-epimerase                                                             |     |
| CIMG_01418 | 3.77  | 2.95E-25  | 4.92  | 6.10E-12 | ABC transporter                                                                            |     |
| CIMG_01422 | 5.26  | 3.35E-34  | 4.62  | 7.10E-12 | tubulin alpha-2 chain                                                                      |     |
| CIMG_01426 | 2.35  | 1.90E-12  | 1.40  | 0.04234  | gamma-butyrobetaine hydroxylase subfamily                                                  |     |
| CIMG_01428 | 2.19  | 8.63E-06  | 5.32  | 3.99E-15 | small oligopeptide transporter                                                             |     |
| CIMG_01429 | 14.94 | 2.21E-83  | 13.83 | 8.38E-30 | nonribosomal peptide synthetase 6                                                          |     |
| CIMG_01430 | 13.09 | 1.54E-86  | 23.07 | 1.87E-49 | ABC multidrug transporter                                                                  |     |
| CIMG_01431 | 11.43 | 2.29E-78  | 21.76 | 2.73E-46 | conserved hypothetical protein (putative pyridine nucleotide-disulphide oxidoreductase)    |     |
| CIMG_01432 | 3.23  | 2.22E-14  | 3.69  | 5.01E-07 | L-ornithine 5-monooxygenase                                                                |     |
| CIMG_01434 | 12.93 | 4.38E-82  | 5.54  | 1.66E-21 | long-chain-fatty-acid-CoA ligase                                                           |     |
| CIMG_01435 | 21.50 | 2.09E-104 | 14.17 | 1.28E-35 | acetylase                                                                                  |     |
| CIMG_01436 | 9.65  | 3.58E-69  | 11.59 | 2.39E-26 | siderophore iron transporter                                                               |     |
| CIMG_01441 | 1.98  | 4.44E-08  | 1.44  | 0.01270  | protein kinase                                                                             |     |
| CIMG_01460 | 1.63  | 0.00024   | 1.88  | 0.00005  | transcription regulator BDF1                                                               |     |
| CIMG_01490 | 1.95  | 2.34E-07  | 1.52  | 0.04008  | conserved hypothetical protein                                                             |     |
| CIMG_01507 | 1.88  | 0.00006   | 2.83  | 1.06E-08 | conserved hypothetical protein                                                             |     |
| CIMG_01510 | 14.59 | 3.39E-98  | 4.02  | 8.10E-13 | acetyl-coenzyme A synthetase FacA                                                          |     |
| CIMG_01511 | 1.54  | 0.00193   | 2.15  | 0.00003  | nucleoporin SONB                                                                           |     |
| CIMG_01518 | 1.68  | 0.00317   | 3.59  | 3.98E-08 | conserved hypothetical protein                                                             |     |
| CIMG_01539 | 4.14  | 1.98E-31  | 2.79  | 5.76E-09 | conserved hypothetical protein                                                             |     |
| CIMG_01541 | 1.90  | 7.69E-06  | 2.75  | 6.52E-09 | GPI mannosyltransferase 2                                                                  | *   |
| CIMG_01542 | 1.75  | 7.70E-06  | 2.47  | 1.40E-09 | proteasome activator subunit 4                                                             |     |
| CIMG_01543 | 3.09  | 6.16E-16  | 2.93  | 3.20E-06 | MOSC domain-containing protein                                                             |     |
| CIMG_01545 | 2.02  | 2.01E-08  | 1.97  | 0.00002  | 2-deoxy-D-gluconate 3-dehydrogenase                                                        |     |
| CIMG_01546 | 2.97  | 7.31E-19  | 2.93  | 1.43E-08 | fructose-1,6-bisphosphatase                                                                |     |
| CIMG_01550 | 1.37  | 0.04053   | 2.40  | 0.00120  | conserved hypothetical protein                                                             |     |
| CIMG_01555 | 2.44  | 9.69E-12  | 2.99  | 3.28E-08 | saccharopine dehydrogenase                                                                 |     |
| CIMG_01558 | 2.07  | 1.62E-08  | 1.55  | 0.03165  | glycerol-3-phosphate O-acyltransferase                                                     |     |
| CIMG_01570 | 3.60  | 1.41E-20  | 5.21  | 6.14E-18 | sucrase/ferredoxin domain-containing protein                                               |     |
| CIMG_01571 | 3.69  | 1.26E-13  | 5.72  | 3.69E-20 | C2H2 zinc finger domain-containing protein                                                 |     |
| CIMG_01576 | 2.07  | 2.29E-08  | 4.73  | 3.29E-14 | mannose-1-phosphate guanylyltransferase                                                    |     |
| CIMG_01582 | 1.43  | 0.01362   | 1.94  | 4.60E-06 | glycerol kinase                                                                            |     |
| CIMG_01584 | 2.93  | 4.42E-20  | 4.14  | 4.24E-09 | conserved hypothetical protein                                                             |     |
| CIMG_01588 | 2.10  | 0.00009   | 2.60  | 0.00001  | conserved hypothetical protein (microtubule associated)                                    |     |

\*: Predicted secreted;

+: Gene under positive selection [19]; G: Gene gained in Coccidioides [19]

H, S: Up-regulated in Hyphae or Spherule by microarray [18]

**Table S1: All genes up-regulated in saprobic phase**

|            |       |          |       |          |                                                                                     |          |
|------------|-------|----------|-------|----------|-------------------------------------------------------------------------------------|----------|
| CIMG_01597 | 1.55  | 0.00584  | 2.70  | 0.00002  | 2-oxoglutarate dehydrogenase E1 component                                           |          |
| CIMG_01600 | 2.24  | 6.47E-08 | 1.27  | 0.02747  | conserved hypothetical protein (BSD domain, TFIIF p62 subunit N-terminal domain)    |          |
| CIMG_01606 | 3.14  | 5.86E-14 | 1.32  | 0.01738  | tubulin-specific chaperone                                                          |          |
| CIMG_01620 | 1.65  | 0.00066  | 3.84  | 3.58E-18 | conserved hypothetical protein (RING finger)                                        |          |
| CIMG_01621 | 2.95  | 7.48E-15 | 2.63  | 2.80E-08 | conserved hypothetical protein                                                      |          |
| CIMG_01622 | 1.62  | 0.00025  | 1.56  | 0.00186  | N-terminal acetyltransferase catalytic subunit                                      |          |
| CIMG_01626 | 1.69  | 0.00193  | 2.03  | 0.00041  | conserved hypothetical protein                                                      |          |
| CIMG_01631 | 1.52  | 0.00685  | 2.85  | 6.27E-08 | phosphatidylinositol phospholipase C                                                |          |
| CIMG_01641 | 1.63  | 0.00012  | 1.61  | 0.00502  | histone deacetylase SIR2                                                            |          |
| CIMG_01646 | 3.14  | 1.16E-20 | 2.13  | 0.00006  | G2/M-specific cyclin NimE                                                           |          |
| CIMG_01661 | 1.93  | 1.03E-07 | 2.52  | 2.52E-09 | Conserved hypothetical protein (putative autophagy regulatory protein Atg2)         |          |
| CIMG_01663 | 10.60 | 6.95E-74 | 2.59  | 1.00E-06 | acyl-coenzyme A synthetase ACSM5                                                    |          |
| CIMG_01667 | 2.35  | 2.13E-10 | 2.01  | 0.00007  | ubiquitin conjugating enzyme                                                        |          |
| CIMG_01670 | 2.55  | 1.97E-14 | 1.58  | 0.02315  | 3,4-dihydroxy-2-butanone 4-phosphate synthase                                       |          |
| CIMG_01674 | 2.62  | 7.89E-09 | 4.00  | 1.68E-13 | magnesium dependent phosphatase                                                     | <b>G</b> |
| CIMG_01686 | 3.73  | 1.01E-22 | 2.53  | 1.39E-06 | spindle pole body component (alp14)                                                 |          |
| CIMG_01687 | 1.40  | 0.02638  | 2.20  | 2.49E-06 | nuclear migration protein NudF                                                      |          |
| CIMG_01697 | 1.69  | 0.00005  | 2.28  | 2.33E-06 | leucyl-tRNA synthetase                                                              |          |
| CIMG_01708 | 1.69  | 0.00006  | 2.32  | 7.88E-07 | GPI transamidase component GAA1                                                     |          |
| CIMG_01710 | 1.68  | 0.03629  | 1.53  | 0.00149  | RTA1 domain-containing protein                                                      |          |
| CIMG_01713 | 10.19 | 2.88E-55 | 4.30  | 1.99E-14 | kinesin family protein                                                              |          |
| CIMG_01715 | 1.38  | 0.00879  | 2.62  | 5.25E-09 | mitogen-activated protein kinase                                                    |          |
| CIMG_01735 | 2.09  | 1.32E-08 | 1.73  | 0.01285  | mitochondrial RNA splicing protein                                                  |          |
| CIMG_01760 | 1.51  | 0.00217  | 2.21  | 2.97E-07 | autophagy protein Apg9                                                              |          |
| CIMG_01786 | 1.44  | 0.01522  | 2.03  | 0.00003  | metal homeostatis protein <i>bsd2</i>                                               |          |
| CIMG_01789 | 2.43  | 7.33E-11 | 1.93  | 0.00244  | conserved hypothetical protein (transmembrane alpha-helix domain)                   | *        |
| CIMG_01793 | 1.52  | 0.00113  | 1.83  | 0.00014  | threonyl-tRNA synthetase                                                            |          |
| CIMG_01802 | 4.70  | 8.20E-07 | 3.06  | 0.00003  | conserved hypothetical protein                                                      | *        |
| CIMG_01807 | 2.05  | 1.61E-08 | 1.99  | 0.00020  | aspartyl-tRNA synthetase                                                            |          |
| CIMG_01816 | 1.79  | 8.21E-06 | 1.85  | 0.00139  | bZIP transcription factor                                                           |          |
| CIMG_01819 | 3.68  | 2.48E-20 | 1.67  | 0.01367  | conserved hypothetical protein                                                      |          |
| CIMG_01834 | 4.23  | 0.00164  | 2.86  | 0.00007  | conserved hypothetical protein                                                      |          |
| CIMG_01839 | 1.84  | 3.07E-06 | 2.88  | 2.68E-09 | Leucine-Rich Repeat domain-containing protein                                       |          |
| CIMG_01844 | 2.07  | 8.79E-09 | 1.50  | 0.00175  | 37S ribosomal protein Rsm22                                                         |          |
| CIMG_01854 | 4.58  | 1.90E-35 | 3.80  | 1.35E-11 | conserved hypothetical protein                                                      |          |
| CIMG_01860 | 3.56  | 2.48E-20 | 6.17  | 1.68E-22 | conserved hypothetical protein (putative beta-lactamase)                            | *        |
| CIMG_01861 | 3.57  | 2.76E-13 | 3.51  | 5.39E-15 | conserved hypothetical protein (putative HC-toxin synthetase)                       |          |
| CIMG_01871 | 1.55  | 0.00970  | 5.78  | 3.40E-24 | prenylcysteine lyase                                                                | *        |
| CIMG_01890 | 2.80  | 6.11E-13 | 1.75  | 0.00094  | spindle-pole body protein                                                           |          |
| CIMG_01894 | 2.37  | 6.76E-11 | 1.80  | 0.00040  | DNA polymerase epsilon catalytic subunit A                                          |          |
| CIMG_01906 | 1.77  | 0.00012  | 2.64  | 1.33E-08 | conserved hypothetical protein                                                      | *        |
| CIMG_01913 | 1.65  | 0.00092  | 2.58  | 2.80E-07 | OefC                                                                                |          |
| CIMG_01923 | 7.87  | 8.61E-26 | 7.09  | 1.37E-18 | conserved hypothetical protein                                                      |          |
| CIMG_01926 | 1.81  | 0.00001  | 1.39  | 0.04727  | C2H2 transcription factor                                                           |          |
| CIMG_01939 | 1.63  | 0.00040  | 1.49  | 0.02124  | N-acetylglucosaminyl transferase component Gpi1                                     | *        |
| CIMG_01949 | 2.29  | 5.57E-10 | 3.31  | 6.93E-09 | SEC14 cytosolic factor                                                              |          |
| CIMG_01950 | 1.51  | 0.00827  | 1.77  | 0.00417  | conserved hypothetical protein (kinetochore protein Mis14 like)                     |          |
| CIMG_01963 | 4.03  | 1.00E-18 | 2.32  | 0.00042  | conserved hypothetical protein                                                      |          |
| CIMG_01967 | 2.57  | 8.92E-14 | 2.03  | 0.00766  | transcriptional regulator                                                           |          |
| CIMG_01972 | 1.73  | 0.00008  | 4.04  | 9.47E-14 | protein-tyrosine phosphatase                                                        |          |
| CIMG_01987 | 1.83  | 0.00048  | 2.39  | 5.83E-06 | conserved hypothetical protein (DUF2467, C2H2 type zinc finger)                     |          |
| CIMG_02033 | 1.76  | 8.81E-06 | 18.70 | 3.51E-39 | conserved hypothetical protein                                                      |          |
| CIMG_02053 | 1.61  | 0.00020  | 2.98  | 7.28E-10 | conserved hypothetical protein (casein kinase substrate phosphoprotein PP28 domain) |          |
| CIMG_02057 | 1.58  | 0.00025  | 2.26  | 1.07E-07 | anucleate primary sterigmata protein B                                              |          |
| CIMG_02074 | 1.78  | 6.19E-06 | 1.30  | 0.03187  | phospholipase D1                                                                    |          |
| CIMG_02090 | 1.61  | 0.00031  | 1.70  | 0.00187  | DnaJ domain-containing protein                                                      | *        |
| CIMG_02102 | 1.82  | 5.51E-06 | 1.79  | 0.00052  | ATP-dependent RNA helicase DHH1                                                     |          |
| CIMG_02103 | 1.46  | 0.00360  | 1.84  | 0.00005  | DNA repair protein Rad18                                                            |          |
| CIMG_02109 | 2.20  | 9.54E-10 | 2.42  | 2.36E-08 | nuclear envelope pore membrane protein                                              |          |
| CIMG_02132 | 1.80  | 0.00128  | 2.68  | 0.00009  | histone H2A.2                                                                       |          |
| CIMG_02133 | 3.24  | 1.25E-13 | 3.34  | 3.32E-07 | histone H2B                                                                         |          |
| CIMG_02136 | 1.39  | 0.02561  | 1.40  | 0.01801  | F-box domain-containing protein                                                     |          |
| CIMG_02161 | 2.13  | 1.98E-08 | 2.57  | 3.66E-07 | valyl-tRNA synthetase                                                               |          |
| CIMG_02171 | 2.71  | 8.16E-13 | 4.11  | 8.61E-14 | C2H2 finger domain-containing protein                                               |          |
| CIMG_02172 | 3.00  | 1.57E-19 | 1.66  | 0.00134  | peroxisomal membrane protein                                                        |          |
| CIMG_02182 | 1.85  | 5.12E-06 | 1.95  | 0.00023  | conserved hypothetical protein (putative Noc1p protein)                             |          |
| CIMG_02194 | 1.65  | 0.00368  | 5.14  | 2.71E-18 | conserved hypothetical protein                                                      |          |
| CIMG_02196 | 1.66  | 0.00014  | 1.46  | 0.02711  | DnaJ domain-containing protein                                                      |          |

\*: Predicted secreted;

+: Gene under positive selection [19]; G: Gene gained in *Coccidioides* [19]

H, S: Up-regulated in Hyphae or Spherule by microarray [18]

**Table S1: All genes up-regulated in saprobic phase**

|            |        |           |       |          |                                                                                               |   |
|------------|--------|-----------|-------|----------|-----------------------------------------------------------------------------------------------|---|
| CIMG_02201 | 1.75   | 0.00004   | 1.51  | 0.02694  | mannosyltransferase PMTI                                                                      |   |
| CIMG_02206 | 2.13   | 5.26E-09  | 1.64  | 0.00407  | oligosaccharyl transferase, STT3 subunit                                                      | * |
| CIMG_02211 | 4.18   | 6.36E-31  | 2.49  | 7.18E-07 | hypothetical protein (putative GPI-anchored glycine-serine rich protein)                      | * |
| CIMG_02217 | 1.90   | 2.67E-07  | 14.16 | 2.92E-37 | RNA polymerase Rpb1 C-terminal repeat domain-containing protein                               |   |
| CIMG_02232 | 2.51   | 7.03E-13  | 2.92  | 6.83E-08 | triacylglycerol lipase                                                                        |   |
| CIMG_02238 | 9.10   | 5.62E-30  | 4.46  | 2.13E-16 | conserved hypothetical protein (patatin-like phospholipase)                                   | H |
| CIMG_02245 | 1.93   | 2.05E-07  | 4.56  | 1.19E-19 | conserved hypothetical protein (fungal specific transcription factor domain)                  |   |
| CIMG_02250 | 1.94   | 1.64E-07  | 1.98  | 0.00010  | conserved hypothetical protein (putative preprotein translocase subunit Sec66)                | * |
| CIMG_02259 | 7.13   | 9.49E-56  | 10.78 | 1.25E-38 | conserved hypothetical protein (DUF2403, DUF2401)                                             | * |
| CIMG_02262 | 1.71   | 0.00006   | 1.74  | 0.01634  | acetyl-CoA acetyltransferase                                                                  |   |
| CIMG_02271 | 1.79   | 0.00088   | 1.68  | 0.02905  | cyclin-dependent kinase regulatory subunit                                                    |   |
| CIMG_02275 | 1.56   | 0.00081   | 4.14  | 1.71E-15 | hypothetical protein (C2HC4 type zinc finger/RING finger)                                     |   |
| CIMG_02277 | 16.46  | 2.76E-80  | 9.16  | 2.49E-34 | benzoate 4-monooxygenase cytochrome P450                                                      | * |
| CIMG_02279 | 15.35  | 1.48E-99  | 1.88  | 0.00419  | CAS1                                                                                          | * |
| CIMG_02294 | 1.32   | 0.03814   | 2.27  | 0.00004  | UPD-GlcNAc transporter                                                                        |   |
| CIMG_02296 | 5.42   | 8.18E-26  | 1.71  | 0.00197  | ELMO/CED-12 family protein                                                                    |   |
| CIMG_02307 | 1.44   | 0.00679   | 2.37  | 0.00003  | translation machinery-associated protein 22                                                   |   |
| CIMG_02314 | 2.57   | 2.82E-10  | 4.22  | 4.28E-13 | polysaccharide deacetylase                                                                    |   |
| CIMG_02315 | 23.90  | 3.50E-103 | 6.46  | 2.22E-26 | conserved hypothetical protein                                                                |   |
| CIMG_02322 | 2.98   | 1.74E-14  | 2.03  | 1.32E-06 | repressor protein                                                                             |   |
| CIMG_02325 | 2.85   | 5.40E-16  | 2.02  | 3.52E-06 | exocyst complex component Sec10                                                               |   |
| CIMG_02329 | 2.60   | 1.32E-14  | 1.76  | 0.00058  | ran GTPase-activating protein 1                                                               |   |
| CIMG_02359 | 2.15   | 8.07E-10  | 2.83  | 7.85E-10 | rho-GTPase-activating protein                                                                 |   |
| CIMG_02360 | 1.97   | 0.00001   | 1.54  | 0.03513  | conserved hypothetical protein (DUF2455)                                                      |   |
| CIMG_02374 | 190.32 | 6.31E-191 | 21.48 | 9.87E-46 | acetamidase                                                                                   |   |
| CIMG_02390 | 34.59  | 1.84E-123 | 26.88 | 2.18E-63 | conserved hypothetical protein (helix-loop-helix DNA-binding domain)                          |   |
| CIMG_02397 | 1.63   | 0.03282   | 5.16  | 6.12E-12 | conserved hypothetical protein (putative pyridine nucleotide-disulphide oxidoreductase)       |   |
| CIMG_02399 | 4.83   | 0.00043   | 5.68  | 9.18E-08 | conserved hypothetical protein                                                                | * |
| CIMG_02401 | 1.80   | 0.00006   | 2.17  | 0.00036  | RfeF protein                                                                                  | + |
| CIMG_02413 | 2.40   | 3.22E-11  | 1.80  | 0.01030  | calmodulin A                                                                                  |   |
| CIMG_02422 | 2.11   | 8.31E-09  | 1.39  | 0.01501  | alpha-1,2-mannosyltransferase                                                                 | * |
| CIMG_02424 | 1.77   | 0.00001   | 1.62  | 0.01174  | ATP-dependent permease MDL1                                                                   |   |
| CIMG_02434 | 15.13  | 1.16E-77  | 7.66  | 3.17E-32 | conserved hypothetical protein (putative inositol-pentakisphosphate 2-kinase )                |   |
| CIMG_02454 | 1.74   | 0.00056   | 2.11  | 4.44E-06 | conserved hypothetical protein (C2H2 type zinc finger)                                        |   |
| CIMG_02455 | 5.24   | 8.12E-42  | 16.18 | 8.71E-56 | conserved hypothetical protein (glutathione S-transferase N-terminal domain)                  |   |
| CIMG_02463 | 1.65   | 0.00010   | 2.23  | 3.05E-06 | conserved hypothetical protein (Chs3p superfamily, putative chitin synthase export chaperone) |   |
| CIMG_02466 | 2.66   | 3.34E-14  | 2.91  | 3.06E-09 | ubiquitin C-terminal hydrolase                                                                |   |
| CIMG_02468 | 6.24   | 1.04E-48  | 4.42  | 3.42E-16 | Delta(24(24(1)))-sterol reductase                                                             |   |
| CIMG_02479 | 2.45   | 1.59E-12  | 2.24  | 3.96E-06 | conserved hypothetical protein                                                                |   |
| CIMG_02492 | 1.65   | 0.01429   | 9.71  | 3.75E-26 | proline-rich antigen 3                                                                        | * |
| CIMG_02505 | 2.63   | 0.00002   | 2.04  | 0.00003  | conserved hypothetical protein                                                                |   |
| CIMG_02517 | 2.57   | 4.22E-14  | 2.59  | 2.58E-07 | STR2 (ergosterol biosynthesis ERG4/ERG24 family)                                              |   |
| CIMG_02519 | 3.95   | 1.19E-17  | 7.94  | 7.94E-31 | mRNA cleavage factor complex component Pcf11                                                  |   |
| CIMG_02520 | 1.47   | 0.00126   | 1.51  | 0.01141  | dimeric dihydrodiol dehydrogenase                                                             |   |
| CIMG_02535 | 3.39   | 1.52E-20  | 1.70  | 0.00373  | ribonuclease HI large subunit                                                                 |   |
| CIMG_02536 | 1.49   | 0.00129   | 1.53  | 0.00579  | peroxisomal membrane protein pex16                                                            |   |
| CIMG_02538 | 3.21   | 1.07E-12  | 1.81  | 0.00735  | conserved hypothetical protein (putative DNA repair protein SAE2/CtIP)                        |   |
| CIMG_02541 | 1.58   | 0.00237   | 1.85  | 0.00765  | zinc knuckle domain-containing protein                                                        |   |
| CIMG_02547 | 3.21   | 1.48E-22  | 12.87 | 5.62E-43 | conserved hypothetical protein                                                                |   |
| CIMG_02549 | 3.24   | 1.89E-21  | 3.02  | 3.35E-11 | putative GTP-binding protein ypt4                                                             |   |
| CIMG_02551 | 3.28   | 2.86E-22  | 3.67  | 4.04E-13 | MFS monosaccharide transporter                                                                |   |
| CIMG_02575 | 1.44   | 0.00650   | 2.01  | 0.00011  | conserved hypothetical protein                                                                |   |
| CIMG_02603 | 1.85   | 0.00011   | 8.48  | 1.46E-32 | C2H2 transcription factor                                                                     |   |
| CIMG_02610 | 2.21   | 3.75E-10  | 3.83  | 1.12E-11 | C-5 sterol desaturase                                                                         |   |
| CIMG_02636 | 1.65   | 0.00050   | 1.58  | 0.02525  | amino acid transporter                                                                        |   |
| CIMG_02657 | 2.36   | 2.10E-11  | 2.40  | 0.00002  | conserved hypothetical protein                                                                |   |
| CIMG_02665 | 2.96   | 0.00083   | 2.40  | 0.00004  | conserved hypothetical protein                                                                |   |
| CIMG_02699 | 3.20   | 2.53E-18  | 2.92  | 4.26E-08 | elongation factor 1-gamma                                                                     |   |
| CIMG_02712 | 1.71   | 0.00005   | 1.51  | 0.00471  | hypercellular protein HypA                                                                    |   |
| CIMG_02713 | 2.15   | 5.93E-08  | 1.23  | 0.03341  | HATPase_c domain-containing protein                                                           |   |
| CIMG_02714 | 2.45   | 6.53E-07  | 1.87  | 0.00469  | conserved hypothetical protein                                                                |   |
| CIMG_02795 | 48.27  | 2.99E-159 | 9.15  | 8.34E-45 | endochitinase 1                                                                               | * |
| CIMG_02812 | 1.69   | 0.01185   | 15.13 | 1.13E-52 | conserved hypothetical protein (Cytochrome P450)                                              | * |
| CIMG_02813 | 1.62   | 0.00014   | 5.09  | 6.34E-20 | conserved hypothetical protein                                                                |   |
| CIMG_02824 | 3.44   | 7.39E-09  | 4.99  | 3.20E-13 | conserved hypothetical protein                                                                |   |
| CIMG_02825 | 1.50   | 0.00508   | 1.83  | 0.00061  | tetratricopeptide repeat domain-containing protein                                            |   |
| CIMG_02827 | 1.45   | 0.00599   | 1.75  | 0.00069  | conserved hypothetical protein                                                                |   |

\*: Predicted secreted;

+: Gene under positive selection [19]; G: Gene gained in Coccidioides [19]

H, S: Up-regulated in Hyphae or Spherule by microarray [18]

**Table S1: All genes up-regulated in saprobic phase**

|            |       |           |       |          |                                                                                      |     |
|------------|-------|-----------|-------|----------|--------------------------------------------------------------------------------------|-----|
| CIMG_02829 | 2.77  | 6.89E-17  | 2.78  | 1.03E-08 | inner centromere protein                                                             |     |
| CIMG_02836 | 3.92  | 3.76E-29  | 5.82  | 2.18E-24 | DNA topoisomerase II                                                                 |     |
| CIMG_02838 | 2.48  | 2.49E-13  | 3.34  | 2.46E-12 | GTPase activating protein                                                            |     |
| CIMG_02860 | 71.67 | 3.00E-190 | 10.36 | 7.93E-27 | chitinase 3                                                                          | * H |
| CIMG_02862 | 1.40  | 0.02100   | 1.60  | 0.00628  | conserved hypothetical protein                                                       |     |
| CIMG_02880 | 4.73  | 8.57E-36  | 2.36  | 0.00002  | mitochondrial carnitine:acyl carnitine carrier                                       |     |
| CIMG_02896 | 2.71  | 9.22E-15  | 1.58  | 0.00318  | conserved hypothetical protein                                                       |     |
| CIMG_02987 | 3.69  | 3.69E-27  | 1.58  | 0.00605  | long chain fatty alcohol oxidase                                                     |     |
| CIMG_03014 | 4.81  | 7.14E-36  | 5.09  | 1.36E-18 | iterative type I polyketide synthase                                                 |     |
| CIMG_03016 | 1.50  | 0.01028   | 2.45  | 0.00003  | conserved hypothetical protein                                                       |     |
| CIMG_03031 | 2.46  | 0.00012   | 3.99  | 0.00018  | conserved hypothetical protein                                                       | G   |
| CIMG_03040 | 3.44  | 2.34E-22  | 6.98  | 3.89E-28 | conserved hypothetical protein (MIF domain-containing protein)                       |     |
| CIMG_03042 | 2.68  | 2.92E-14  | 1.85  | 0.00050  | conserved hypothetical protein (fungal Zn(2)-Cys(6) binuclear cluster domain)        |     |
| CIMG_03069 | 2.45  | 4.68E-13  | 2.53  | 3.94E-09 | putative membrane protein (DUF803)                                                   |     |
| CIMG_03081 | 4.21  | 2.53E-29  | 3.06  | 4.35E-10 | conserved hypothetical protein (fungal Zn(2)-Cys(6) binuclear cluster domain)        |     |
| CIMG_03086 | 3.17  | 1.57E-20  | 1.62  | 0.00140  | dual-specificity MAP kinase kinase dSOR1                                             |     |
| CIMG_03094 | 1.65  | 0.00012   | 1.36  | 0.02030  | conserved hypothetical protein                                                       |     |
| CIMG_03099 | 1.35  | 0.03062   | 2.83  | 7.60E-06 | inositolphosphorylceramide-B C-26 hydroxylase                                        |     |
| CIMG_03100 | 3.89  | 7.18E-28  | 2.62  | 7.55E-12 | RNA splicing factor                                                                  |     |
| CIMG_03105 | 3.70  | 5.60E-11  | 2.33  | 0.00005  | TAM domain methyltransferase                                                         |     |
| CIMG_03112 | 5.36  | 8.15E-21  | 1.89  | 0.00150  | phosphoglycerate mutase                                                              |     |
| CIMG_03136 | 1.40  | 0.04686   | 6.15  | 4.84E-18 | MFS transporter                                                                      |     |
| CIMG_03152 | 3.61  | 6.91E-14  | 6.59  | 2.38E-16 | class II aldolase/adducin domain-containing protein                                  |     |
| CIMG_03167 | 2.36  | 0.00001   | 3.74  | 6.62E-13 | conserved hypothetical protein (putative FMN-dependant dehydrogenase)                |     |
| CIMG_03169 | 4.88  | 2.11E-23  | 2.67  | 7.52E-10 | conserved hypothetical protein                                                       |     |
| CIMG_03173 | 7.96  | 9.21E-64  | 4.09  | 3.84E-20 | conserved hypothetical protein                                                       |     |
| CIMG_03175 | 14.85 | 1.03E-88  | 8.58  | 2.72E-27 | glucanase                                                                            | *   |
| CIMG_03181 | 1.87  | 0.00292   | 21.49 | 1.66E-61 | conserved hypothetical protein                                                       | *   |
| CIMG_03182 | 1.54  | 0.00095   | 3.49  | 6.95E-12 | Conserved hypothetical protein (DUF504, endonuclease/exonuclease/phosphatase family) |     |
| CIMG_03210 | 1.62  | 0.00095   | 1.58  | 0.00041  | Poly                                                                                 |     |
| CIMG_03219 | 1.80  | 0.00004   | 4.33  | 5.54E-15 | fungal specific transcription factor domain-containing protein                       |     |
| CIMG_03226 | 1.71  | 0.00007   | 2.46  | 0.00017  | EBP domain-containing protein                                                        |     |
| CIMG_03229 | 2.12  | 9.90E-09  | 3.96  | 2.71E-14 | conserved hypothetical protein                                                       |     |
| CIMG_03244 | 1.53  | 0.00173   | 2.03  | 0.00007  | DNA-directed RNA polymerase II largest subunit                                       |     |
| CIMG_03252 | 6.89  | 1.20E-56  | 2.61  | 9.83E-06 | aldehyde dehydrogenase                                                               |     |
| CIMG_03253 | 1.50  | 0.00203   | 1.83  | 0.00035  | ubiquitin-protein ligase Sel1/Ubx2                                                   | *   |
| CIMG_03259 | 1.41  | 0.00984   | 2.05  | 0.00033  | tRNA-dihydrouridine synthase 3                                                       |     |
| CIMG_03286 | 1.83  | 0.00822   | 2.05  | 0.00003  | conserved hypothetical protein (Ankyrin repeat, protein kinase domain)               |     |
| CIMG_03287 | 4.40  | 1.67E-10  | 1.70  | 0.02640  | conserved hypothetical protein                                                       |     |
| CIMG_03288 | 1.59  | 0.00066   | 1.47  | 0.04058  | translocation complex componenet                                                     |     |
| CIMG_03303 | 1.82  | 1.35E-06  | 1.57  | 0.00370  | AMP binding domain-containing protein                                                |     |
| CIMG_03320 | 6.41  | 6.92E-35  | 3.59  | 2.60E-11 | DNA replication initiation factor Cdc45                                              | *   |
| CIMG_03322 | 3.24  | 1.35E-12  | 6.02  | 3.78E-23 | conserved hypothetical protein (F-box domain)                                        |     |
| CIMG_03323 | 2.62  | 3.89E-15  | 3.37  | 3.55E-12 | conserved hypothetical protein (DUF1014)                                             |     |
| CIMG_03328 | 7.65  | 2.22E-63  | 4.81  | 9.58E-24 | homeobox and C2H2 transcription factor                                               |     |
| CIMG_03339 | 3.04  | 7.40E-16  | 2.44  | 0.00003  | ADP-ribosylglycohydrolase                                                            |     |
| CIMG_03341 | 2.70  | 1.35E-13  | 1.62  | 0.00819  | class II aldolase/adducin domain-containing protein                                  |     |
| CIMG_03345 | 4.65  | 3.42E-09  | 7.44  | 1.14E-11 | conserved hypothetical protein                                                       |     |
| CIMG_03360 | 2.81  | 2.48E-15  | 1.76  | 0.00044  | conserved hypothetical protein (inhibitor of apoptosis domain)                       |     |
| CIMG_03364 | 1.67  | 0.00061   | 1.58  | 0.00363  | diphthine synthase                                                                   |     |
| CIMG_03374 | 1.86  | 4.32E-06  | 4.52  | 4.73E-21 | conserved hypothetical protein (SUN-family beta-glucosidase)                         | *   |
| CIMG_03375 | 1.53  | 0.00106   | 1.91  | 0.00007  | leucine carboxyl methyltransferase superfamily                                       |     |
| CIMG_03387 | 5.82  | 9.56E-32  | 7.62  | 4.37E-18 | histone H4                                                                           |     |
| CIMG_03388 | 3.33  | 1.27E-12  | 3.88  | 2.70E-08 | histone H3                                                                           |     |
| CIMG_03389 | 2.41  | 4.12E-08  | 1.78  | 0.00284  | integral membrane protein (mvp17 /PMP22 family)                                      |     |
| CIMG_03392 | 1.68  | 0.00013   | 1.67  | 0.00896  | 5'-3' exoribonuclease Dhp1                                                           |     |
| CIMG_03393 | 2.81  | 2.03E-16  | 2.12  | 3.33E-07 | intracellular protein transporter UsoA                                               |     |
| CIMG_03394 | 2.01  | 1.84E-08  | 2.58  | 1.66E-08 | isoleucyl-tRNA synthetase, cytoplasmic                                               |     |
| CIMG_03403 | 1.88  | 1.42E-06  | 9.42  | 5.21E-38 | conserved hypothetical protein (peptidase family M20/M25/M40)                        |     |
| CIMG_03406 | 1.74  | 0.00004   | 1.93  | 0.00121  | argininosuccinate synthetase                                                         |     |
| CIMG_03408 | 7.12  | 3.26E-57  | 2.71  | 4.07E-11 | low temperature essential protein 1                                                  |     |
| CIMG_03411 | 1.57  | 0.00246   | 3.35  | 3.86E-11 | conserved hypothetical protein                                                       |     |
| CIMG_03419 | 1.46  | 0.00438   | 1.64  | 0.00553  | vesicle-fusing ATPase                                                                |     |
| CIMG_03431 | 2.00  | 0.00020   | 1.62  | 0.03370  | conserved hypothetical protein                                                       |     |
| CIMG_03445 | 1.55  | 0.00183   | 1.66  | 0.01334  | hypothetical protein (triose-phosphate transporter family)                           |     |
| CIMG_03448 | 1.47  | 0.02665   | 1.60  | 0.00123  | transcription factor tfiib complex subunit brf1                                      |     |
| CIMG_03450 | 2.47  | 7.02E-07  | 3.99  | 6.59E-13 | copper resistance-associated P-type ATPase                                           |     |
| CIMG_03451 | 2.96  | 2.29E-13  | 1.66  | 0.00540  | crossover junction endonuclease mus81                                                |     |
| CIMG_03459 | 1.45  | 0.01786   | 2.79  | 4.08E-07 | Zn-dependent hydrolase/oxidoreductase                                                |     |

\*: Predicted secreted;

+: Gene under positive selection [19]; G: Gene gained in Coccidioides [19]

H, S: Up-regulated in Hyphae or Spherule by microarray [18]

**Table S1: All genes up-regulated in saprobic phase**

|            |       |          |        |          |                                                                                                              |   |
|------------|-------|----------|--------|----------|--------------------------------------------------------------------------------------------------------------|---|
| CIMG_03464 | 1.82  | 3.77E-06 | 1.90   | 0.00043  | signal peptidase I                                                                                           |   |
| CIMG_03466 | 2.61  | 5.12E-12 | 1.46   | 0.04719  | conserved hypothetical protein (BTB/POZ domain)                                                              |   |
| CIMG_03472 | 4.44  | 2.22E-27 | 1.56   | 0.03607  | extracellular serine-threonine rich protein                                                                  | * |
| CIMG_03476 | 1.88  | 7.88E-07 | 1.70   | 0.00517  | conserved hypothetical protein                                                                               |   |
| CIMG_03487 | 2.78  | 6.81E-13 | 2.24   | 1.02E-06 | conserved hypothetical protein                                                                               |   |
| CIMG_03489 | 2.05  | 2.66E-06 | 2.66   | 1.42E-09 | aldose 1-epimerase                                                                                           |   |
| CIMG_03490 | 10.53 | 1.05E-18 | 2.60   | 2.06E-06 | conserved hypothetical protein                                                                               |   |
| CIMG_03496 | 1.44  | 0.01849  | 1.78   | 0.00191  | ATP-dependent rRNA helicase SPB4                                                                             |   |
| CIMG_03512 | 2.02  | 6.47E-08 | 1.54   | 0.00791  | short-chain dehydrogenase/reductase                                                                          |   |
| CIMG_03517 | 12.66 | 2.02E-92 | 12.23  | 4.79E-42 | conserved hypothetical protein                                                                               |   |
| CIMG_03529 | 2.22  | 7.79E-11 | 4.00   | 7.47E-16 | N-acetylglucosamine-phosphate mutase                                                                         |   |
| CIMG_03530 | 1.59  | 0.00154  | 1.49   | 0.01380  | Mn2+ homeostasis protein                                                                                     | * |
| CIMG_03540 | 6.51  | 1.26E-28 | 8.86   | 2.85E-29 | conserved hypothetical protein                                                                               |   |
| CIMG_03564 | 1.93  | 6.49E-06 | 1.56   | 0.01284  | HEC/Ndc80p family protein                                                                                    |   |
| CIMG_03574 | 1.60  | 0.00040  | 1.78   | 0.00248  | tubulin-tyrosine ligase                                                                                      |   |
| CIMG_03576 | 1.64  | 0.00030  | 1.88   | 0.00013  | Ccr4-Not transcription complex subunit                                                                       | S |
| CIMG_03579 | 2.24  | 5.82E-06 | 2.81   | 5.09E-08 | DASH complex subunit Duo1                                                                                    |   |
| CIMG_03582 | 2.52  | 6.38E-08 | 1.55   | 0.01399  | conserved hypothetical protein (Ydr279p protein family)                                                      | + |
| CIMG_03584 | 1.84  | 0.00002  | 2.29   | 0.00003  | acetolactate synthase                                                                                        |   |
| CIMG_03589 | 1.33  | 0.03475  | 1.62   | 0.00472  | stress response protein nst1                                                                                 |   |
| CIMG_03597 | 1.66  | 0.00149  | 1.57   | 0.01097  | conserved hypothetical protein                                                                               |   |
| CIMG_03602 | 3.33  | 1.66E-19 | 2.69   | 8.45E-09 | protein serine/threonine kinase                                                                              |   |
| CIMG_03615 | 2.07  | 1.45E-08 | 1.40   | 0.04007  | conserved hypothetical protein                                                                               |   |
| CIMG_03620 | 1.41  | 0.01760  | 1.67   | 0.01909  | nuclear transport factor 2 domain                                                                            |   |
| CIMG_03623 | 1.67  | 0.00008  | 1.50   | 0.01359  | uncharacterized conserved protein CG6151-P (putative clathrin-coated vesicle protein)                        |   |
| CIMG_03628 | 1.57  | 0.00047  | 1.38   | 0.02523  | glutamate carboxypeptidase Tre2                                                                              |   |
| CIMG_03635 | 3.98  | 6.70E-28 | 4.41   | 3.33E-12 | hydroxymethylglutaryl-CoA synthase Erg13                                                                     |   |
| CIMG_03637 | 2.80  | 7.12E-06 | 2.02   | 0.00175  | conserved hypothetical protein                                                                               |   |
| CIMG_03644 | 3.73  | 2.55E-26 | 36.15  | 2.08E-58 | galactose-proton symporter                                                                                   |   |
| CIMG_03659 | 2.14  | 1.74E-07 | 1.84   | 0.00013  | conserved hypothetical protein                                                                               |   |
| CIMG_03661 | 1.58  | 0.00200  | 1.71   | 0.01034  | conserved hypothetical protein                                                                               |   |
| CIMG_03671 | 1.77  | 0.00035  | 1.70   | 0.00359  | conserved hypothetical protein                                                                               |   |
| CIMG_03672 | 3.74  | 7.68E-23 | 2.34   | 1.14E-06 | lipase/esterase                                                                                              |   |
| CIMG_03680 | 3.14  | 3.14E-11 | 4.08   | 8.59E-17 | conserved hypothetical protein                                                                               |   |
| CIMG_03690 | 2.02  | 2.10E-07 | 1.83   | 0.00049  | Conserved hypothetical protein (ARID/BRIGHT DNA binding domain)                                              |   |
| CIMG_03694 | 2.53  | 2.22E-11 | 3.54   | 3.15E-10 | conserved hypothetical protein                                                                               |   |
| CIMG_03710 | 1.46  | 0.00239  | 2.08   | 0.00002  | ankyrin repeat protein                                                                                       |   |
| CIMG_03716 | 8.89  | 7.20E-73 | 9.34   | 3.20E-25 | heat shock protein 30                                                                                        |   |
| CIMG_03723 | 1.91  | 8.70E-07 | 1.42   | 0.02234  | C6 transcription factor                                                                                      |   |
| CIMG_03725 | 2.06  | 6.06E-08 | 3.61   | 8.51E-12 | zinc finger transcription factor pacC                                                                        |   |
| CIMG_03744 | 1.83  | 7.56E-06 | 3.68   | 4.59E-13 | conserved hypothetical protein                                                                               |   |
| CIMG_03763 | 3.30  | 1.80E-11 | 1.96   | 0.00003  | conserved hypothetical protein                                                                               |   |
| CIMG_03772 | 4.11  | 7.07E-19 | 1.85   | 0.00302  | conserved hypothetical protein                                                                               |   |
| CIMG_03776 | 1.31  | 0.04773  | 2.56   | 7.30E-08 | glutamyl-tRNA synthetase                                                                                     |   |
| CIMG_03777 | 2.74  | 2.18E-13 | 1.90   | 0.00003  | glutaminase                                                                                                  | * |
| CIMG_03783 | 1.84  | 1.69E-06 | 2.41   | 1.10E-06 | peroxin 19                                                                                                   |   |
| CIMG_03786 | 3.07  | 1.49E-19 | 5.15   | 1.22E-16 | conserved hypothetical protein                                                                               | * |
| CIMG_03793 | 1.44  | 0.00421  | 1.57   | 0.00112  | SNARE-dependent exocytosis protein                                                                           | S |
| CIMG_03795 | 2.14  | 1.09E-08 | 1.87   | 0.00005  | mRNA 3'-end-processing protein rna14                                                                         |   |
| CIMG_03798 | 1.53  | 0.00116  | 1.33   | 0.01417  | transcriptional activator spt7                                                                               |   |
| CIMG_03813 | 1.45  | 0.02194  | 2.47   | 9.06E-07 | conserved hypothetical protein                                                                               | * |
| CIMG_03820 | 4.71  | 1.57E-20 | 2.81   | 3.01E-06 | conserved hypothetical protein (zinc finger)                                                                 |   |
| CIMG_03824 | 6.75  | 8.61E-56 | 2.94   | 6.12E-10 | MFS peptide transporter Ptr2                                                                                 |   |
| CIMG_03830 | 2.19  | 2.23E-09 | 1.51   | 0.03943  | conserved hypothetical protein (DUF2373)                                                                     |   |
| CIMG_03840 | 17.57 | 3.82E-89 | 3.39   | 4.86E-07 | beta-lactamase                                                                                               |   |
| CIMG_03841 | 2.22  | 8.97E-11 | 2.13   | 7.42E-06 | integral membrane protein                                                                                    | * |
| CIMG_03846 | 2.73  | 2.69E-10 | 4.06   | 1.79E-15 | conserved hypothetical protein (MYND finger)                                                                 | G |
| CIMG_03848 | 1.66  | 0.00005  | 10.14  | 7.06E-32 | conserved hypothetical protein (DnaJ domain)                                                                 |   |
| CIMG_03870 | 20.47 | 3.12E-80 | 180.55 | 3.06E-69 | hypothetical protein                                                                                         | * |
| CIMG_03879 | 3.80  | 1.12E-21 | 3.37   | 9.24E-12 | conserved hypothetical protein                                                                               |   |
| CIMG_03884 | 5.58  | 1.52E-12 | 3.46   | 1.26E-08 | conserved hypothetical protein                                                                               |   |
| CIMG_03887 | 1.70  | 0.00004  | 6.82   | 8.38E-32 | tripeptidyl peptidase SED3                                                                                   | * |
| CIMG_03888 | 4.37  | 9.54E-29 | 16.28  | 2.78E-38 | beta-glucosidase                                                                                             | * |
| CIMG_03906 | 3.07  | 7.17E-12 | 2.54   | 3.80E-07 | conserved hypothetical protein (putative ferric reductase-like transmembrane component)                      |   |
| CIMG_03910 | 1.88  | 0.00001  | 1.63   | 0.00768  | capsule-associated protein CAP1                                                                              | * |
| CIMG_03912 | 1.79  | 8.94E-06 | 2.86   | 3.78E-10 | cysteine dioxygenase                                                                                         |   |
| CIMG_03917 | 1.83  | 0.00508  | 7.64   | 2.07E-13 | conserved hypothetical protein (CENP-B N-terminal DNA-binding domain, putative centromere binding protein B) |   |

\*: Predicted secreted;

+: Gene under positive selection [19]; G: Gene gained in *Coccidioides* [19]

H, S: Up-regulated in Hyphae or Spherule by microarray [18]

**Table S1: All genes up-regulated in saprobic phase**

|            |       |          |       |          |                                                                                 |     |
|------------|-------|----------|-------|----------|---------------------------------------------------------------------------------|-----|
| CIMG_03953 | 1.69  | 0.00011  | 2.04  | 0.00087  | aureobasidin resistance protein Aur1                                            |     |
| CIMG_03955 | 15.38 | 8.55E-94 | 2.46  | 0.00251  | conserved hypothetical protein (WW domain)                                      |     |
| CIMG_03981 | 2.84  | 1.47E-15 | 4.99  | 5.45E-25 | neutral/alkaline nonlysosomal ceramidase                                        | *   |
| CIMG_03987 | 2.69  | 4.44E-10 | 2.81  | 0.00019  | hypothetical protein                                                            |     |
| CIMG_03989 | 3.71  | 3.09E-06 | 1.61  | 0.01054  | uncleaved alkaline protease                                                     | *   |
| CIMG_04010 | 1.60  | 0.00025  | 2.84  | 9.37E-10 | metacaspase CasA                                                                |     |
| CIMG_04011 | 1.76  | 0.00006  | 1.51  | 0.00842  | leucine Rich Repeat domain-containing protein                                   |     |
| CIMG_04013 | 2.17  | 3.15E-10 | 2.53  | 1.87E-07 | CBS and PB1 domain-containing protein                                           |     |
| CIMG_04014 | 1.38  | 0.02179  | 1.87  | 0.00062  | importin beta-3 subunit                                                         | *   |
| CIMG_04015 | 4.98  | 2.38E-40 | 3.54  | 3.40E-13 | isoflavone reductase                                                            |     |
| CIMG_04027 | 1.89  | 7.87E-07 | 2.15  | 4.80E-07 | serine/threonine-protein kinase ssp1                                            | +   |
| CIMG_04028 | 3.46  | 2.48E-17 | 2.09  | 6.23E-06 | conserved hypothetical protein                                                  |     |
| CIMG_04032 | 1.44  | 0.02209  | 2.06  | 0.00004  | conserved hypothetical protein (DUF2349)                                        |     |
| CIMG_04038 | 1.75  | 0.00002  | 2.24  | 0.00007  | casein kinase I isoform gamma-1                                                 |     |
| CIMG_04062 | 2.36  | 1.81E-07 | 2.76  | 0.00005  | 5-methyltetrahydropteroyltriglutamate-homocysteine methyltransferase            |     |
| CIMG_04070 | 10.78 | 2.97E-42 | 7.19  | 4.66E-17 | conserved hypothetical protein                                                  | *   |
| CIMG_04072 | 2.57  | 1.86E-09 | 2.23  | 0.00004  | cAMP-mediated signaling protein Sok1                                            |     |
| CIMG_04075 | 3.86  | 4.84E-11 | 7.62  | 9.89E-14 | conserved hypothetical protein                                                  |     |
| CIMG_04084 | 2.39  | 1.32E-11 | 2.25  | 0.00002  | ornithine carbamoyltransferase                                                  |     |
| CIMG_04099 | 1.38  | 0.01585  | 2.18  | 0.00004  | conserved hypothetical protein                                                  | *   |
| CIMG_04101 | 2.35  | 1.23E-08 | 2.47  | 1.63E-06 | conserved hypothetical protein                                                  |     |
| CIMG_04102 | 2.09  | 8.52E-08 | 1.40  | 0.02616  | dihydrofolate synthetase Fol3                                                   |     |
| CIMG_04103 | 3.28  | 7.53E-20 | 2.58  | 2.02E-08 | serine/threonine protein kinase 3 (cell division control protein 15)            |     |
| CIMG_04117 | 1.81  | 3.52E-06 | 1.82  | 0.00004  | conserved hypothetical protein (YCI1-related domain)                            |     |
| CIMG_04126 | 1.40  | 0.03762  | 2.14  | 0.00023  | methionine aminopeptidase 2B                                                    |     |
| CIMG_04135 | 1.35  | 0.03430  | 1.77  | 0.00090  | amino acid transporter                                                          |     |
| CIMG_04157 | 1.94  | 2.22E-07 | 2.33  | 0.00016  | killer toxin sensitivity protein                                                |     |
| CIMG_04163 | 13.05 | 4.04E-64 | 24.54 | 1.83E-64 | ras guanine-nucleotide exchange protein                                         |     |
| CIMG_04166 | 10.87 | 6.45E-83 | 8.92  | 2.63E-32 | conserved hypothetical protein                                                  |     |
| CIMG_04173 | 1.51  | 0.00471  | 2.02  | 1.03E-06 | pH signal transduction protein PalA                                             |     |
| CIMG_04186 | 6.34  | 2.33E-28 | 15.68 | 3.52E-48 | conserved hypothetical protein                                                  |     |
| CIMG_04188 | 3.52  | 1.08E-23 | 13.65 | 2.85E-39 | GABA permease                                                                   | H   |
| CIMG_04189 | 2.27  | 0.00991  | 3.90  | 0.00002  | conserved hypothetical protein                                                  |     |
| CIMG_04202 | 2.41  | 8.68E-10 | 2.32  | 1.68E-08 | protein kinase Scy1                                                             |     |
| CIMG_04211 | 1.91  | 1.16E-06 | 1.70  | 0.00108  | RSC complex subunit Sfh1                                                        |     |
| CIMG_04218 | 1.47  | 0.00685  | 1.67  | 0.00127  | GCN20 (ABC transporter)                                                         |     |
| CIMG_04220 | 2.01  | 1.42E-06 | 1.98  | 0.01252  | MFS multidrug transporter                                                       |     |
| CIMG_04222 | 1.84  | 3.83E-06 | 4.20  | 3.19E-13 | conserved hypothetical protein                                                  |     |
| CIMG_04230 | 1.33  | 0.04958  | 1.27  | 0.03793  | JmjC domain-containing protein                                                  |     |
| CIMG_04239 | 1.94  | 7.85E-06 | 1.97  | 0.00080  | hypothetical protein (RNA recognition motif)                                    |     |
| CIMG_04272 | 1.63  | 0.00011  | 1.60  | 0.00172  | peroxisomal targeting signal-1 receptor                                         |     |
| CIMG_04305 | 1.50  | 0.00255  | 1.43  | 0.01235  | 2-hydroxyphytanoyl-CoA lyase                                                    |     |
| CIMG_04307 | 1.61  | 0.00035  | 1.39  | 0.03856  | RNA polymerase II subunit 7                                                     |     |
| CIMG_04308 | 2.06  | 6.41E-07 | 3.30  | 1.60E-11 | Conserved hypothetical protein (DUF962)                                         |     |
| CIMG_04311 | 1.91  | 1.50E-06 | 1.43  | 0.03429  | signal peptidase complex component (microsomal signal peptidase 25 kDa subunit) |     |
| CIMG_04317 | 13.21 | 2.55E-92 | 7.54  | 4.02E-27 | extracellular matrix protein                                                    | * H |
| CIMG_04319 | 3.18  | 1.29E-13 | 1.64  | 0.00713  | ribosome biogenesis protein Noc4                                                |     |
| CIMG_04335 | 2.11  | 0.00005  | 7.09  | 1.81E-15 | conserved hypothetical protein                                                  |     |
| CIMG_04343 | 1.38  | 0.01334  | 1.62  | 0.00288  | cytosolic regulator Pianissimo                                                  | S   |
| CIMG_04371 | 3.83  | 7.41E-15 | 3.28  | 7.56E-09 | conserved hypothetical protein                                                  |     |
| CIMG_04372 | 2.23  | 1.54E-06 | 4.02  | 2.50E-12 | conserved hypothetical protein                                                  |     |
| CIMG_04381 | 2.32  | 2.95E-09 | 1.87  | 0.00015  | conserved hypothetical protein                                                  |     |
| CIMG_04401 | 4.67  | 8.09E-38 | 4.58  | 7.45E-18 | hexokinase-1                                                                    |     |
| CIMG_04414 | 1.60  | 0.00050  | 2.28  | 0.00007  | n-acetylglucosamine-6-phosphate deacetylase                                     |     |
| CIMG_04416 | 2.38  | 7.80E-13 | 10.42 | 1.89E-36 | carboxypeptidase 2                                                              | *   |
| CIMG_04417 | 6.20  | 1.29E-51 | 4.79  | 4.07E-21 | cutinase transcription factor 1 alpha                                           |     |
| CIMG_04443 | 2.31  | 9.92E-10 | 1.96  | 0.00004  | alpha-1,2-mannosyltransferase                                                   | *   |
| CIMG_04451 | 2.02  | 8.30E-09 | 3.44  | 1.12E-14 | cystathionine gamma-synthase                                                    |     |
| CIMG_04460 | 12.32 | 2.73E-85 | 2.99  | 1.13E-10 | acetamidase                                                                     |     |
| CIMG_04462 | 1.75  | 0.00003  | 1.46  | 0.04420  | splicing factor U2AF 35 kDa subunit                                             |     |
| CIMG_04464 | 2.75  | 7.67E-12 | 8.66  | 3.56E-29 | conserved hypothetical protein                                                  | *   |
| CIMG_04468 | 9.57  | 5.40E-75 | 2.84  | 4.07E-09 | conserved hypothetical protein (putative short chain dehydrogenase)             |     |
| CIMG_04470 | 1.89  | 0.00003  | 1.97  | 0.00293  | membrane bound C2 domain-containing protein                                     | S   |
| CIMG_04476 | 2.76  | 2.23E-11 | 3.22  | 6.76E-08 | histone deacetylase phd1                                                        |     |
| CIMG_04479 | 4.68  | 1.58E-35 | 2.13  | 0.00003  | isochorismatase family hydrolase                                                |     |
| CIMG_04481 | 3.50  | 1.15E-16 | 2.28  | 2.07E-06 | transcription/RNA-processing factor Ssu72                                       |     |
| CIMG_04487 | 2.88  | 1.42E-17 | 3.36  | 4.86E-13 | cell polarity protein                                                           |     |
| CIMG_04488 | 2.01  | 1.50E-07 | 2.20  | 0.00015  | HMG-CoA reductase                                                               |     |
| CIMG_04495 | 4.00  | 2.18E-30 | 2.27  | 2.15E-06 | ras GTPase activating protein                                                   |     |

\*: Predicted secreted;

+: Gene under positive selection [19]; G: Gene gained in *Coccidioides* [19]

H, S: Up-regulated in Hyphae or Spherule by microarray [18]



**Table S1: All genes up-regulated in saprobic phase**

|            |       |          |       |          |                                                                     |     |
|------------|-------|----------|-------|----------|---------------------------------------------------------------------|-----|
| CIMG_04497 | 2.28  | 1.14E-06 | 12.44 | 1.75E-40 | conserved hypothetical protein                                      | *   |
| CIMG_04498 | 7.71  | 8.38E-47 | 2.31  | 0.00003  | NUDIX family hydrolase                                              |     |
| CIMG_04500 | 1.40  | 0.01308  | 1.55  | 0.02020  | phenylalanyl-tRNA synthetase, subunit alpha                         |     |
| CIMG_04501 | 2.82  | 8.56E-16 | 2.75  | 1.99E-10 | sugar transporter                                                   |     |
| CIMG_04506 | 1.98  | 0.00007  | 2.48  | 4.04E-08 | amino acid permease                                                 |     |
| CIMG_04518 | 4.10  | 1.99E-13 | 18.78 | 4.90E-55 | leucine aminopeptidase 2                                            | * H |
| CIMG_04530 | 1.53  | 0.00478  | 3.55  | 1.39E-13 | conserved hypothetical protein                                      | *   |
| CIMG_04554 | 2.96  | 1.09E-18 | 2.17  | 0.00001  | kinesin family protein                                              |     |
| CIMG_04573 | 1.54  | 0.00079  | 1.70  | 0.00107  | pre-mRNA splicing factor                                            |     |
| CIMG_04597 | 5.47  | 1.67E-44 | 1.61  | 0.00391  | putative GPI-anchored serine-threonine rich protein                 | *   |
| CIMG_04608 | 1.80  | 5.07E-06 | 6.22  | 1.54E-30 | MFS transporter                                                     |     |
| CIMG_04618 | 4.53  | 5.56E-22 | 1.50  | 0.00248  | conserved hypothetical protein                                      |     |
| CIMG_04622 | 3.11  | 2.11E-20 | 2.98  | 3.47E-09 | CCAAT binding protein HAPC                                          |     |
| CIMG_04631 | 1.74  | 0.00002  | 3.50  | 9.35E-11 | calmodulin-dependent protein kinase                                 |     |
| CIMG_04642 | 7.13  | 2.96E-32 | 27.77 | 1.48E-62 | C2H2 zinc finger domain-containing protein FlbC                     |     |
| CIMG_04649 | 4.40  | 1.82E-35 | 2.55  | 6.71E-08 | succinate-semialdehyde dehydrogenase Uga2                           |     |
| CIMG_04651 | 1.98  | 1.01E-07 | 3.84  | 5.90E-08 | short chain dehydrogenase                                           |     |
| CIMG_04655 | 2.34  | 6.62E-09 | 5.74  | 3.31E-21 | conserved hypothetical protein                                      |     |
| CIMG_04660 | 3.49  | 4.29E-22 | 3.93  | 1.14E-11 | cellular morphogenesis protein                                      | *   |
| CIMG_04665 | 5.11  | 8.02E-40 | 2.52  | 9.20E-07 | conserved hypothetical protein                                      | *   |
| CIMG_04672 | 3.26  | 0.00013  | 2.84  | 0.00003  | conserved hypothetical protein (SET domain)                         |     |
| CIMG_04675 | 2.11  | 6.09E-09 | 2.71  | 7.55E-11 | conserved hypothetical protein                                      |     |
| CIMG_04701 | 7.19  | 1.42E-11 | 1.86  | 0.00603  | conserved hypothetical protein                                      |     |
| CIMG_04706 | 1.90  | 0.00151  | 1.85  | 0.00021  | conserved hypothetical protein                                      | G   |
| CIMG_04712 | 1.97  | 1.45E-06 | 2.41  | 2.89E-06 | conserved hypothetical protein (peptidase family C50)               |     |
| CIMG_04720 | 1.65  | 0.00071  | 2.33  | 7.10E-07 | conserved hypothetical protein                                      |     |
| CIMG_04729 | 1.97  | 0.00003  | 2.12  | 0.00111  | heat shock protein                                                  |     |
| CIMG_04735 | 1.83  | 3.61E-06 | 6.32  | 2.12E-21 | conserved hypothetical protein                                      |     |
| CIMG_04747 | 1.36  | 0.03273  | 1.74  | 0.00137  | cell cycle inhibitor Nif1                                           |     |
| CIMG_04749 | 4.50  | 2.84E-34 | 4.37  | 1.73E-20 | conserved hypothetical protein                                      |     |
| CIMG_04750 | 1.89  | 1.02E-06 | 1.73  | 0.00103  | class V chitinase                                                   |     |
| CIMG_04769 | 1.86  | 4.33E-07 | 1.68  | 0.00190  | F-actin capping protein beta subunit                                |     |
| CIMG_04782 | 1.46  | 0.00547  | 3.38  | 2.02E-13 | conserved hypothetical protein                                      |     |
| CIMG_04790 | 2.04  | 2.17E-06 | 1.82  | 0.00125  | phosphoribosylglycinamide formyltransferase                         |     |
| CIMG_04792 | 2.37  | 4.30E-10 | 2.07  | 0.00002  | dUTPase                                                             |     |
| CIMG_04797 | 1.97  | 3.20E-08 | 6.78  | 6.88E-24 | cystinosin                                                          |     |
| CIMG_04798 | 1.96  | 5.63E-08 | 3.83  | 1.35E-17 | conserved hypothetical protein                                      |     |
| CIMG_04804 | 1.85  | 4.13E-06 | 1.62  | 0.00018  | MYB family conidiophore development protein FlbD                    |     |
| CIMG_04844 | 2.79  | 2.34E-11 | 2.69  | 1.53E-07 | endo-1,3(4)-beta-glucanase                                          | *   |
| CIMG_04846 | 1.55  | 0.00086  | 1.73  | 0.00025  | golgi complex component                                             |     |
| CIMG_04887 | 2.70  | 3.24E-14 | 2.39  | 1.25E-06 | mitochondrial protein import protein MAS5                           |     |
| CIMG_04899 | 1.74  | 0.00018  | 3.62  | 3.89E-13 | leucine Rich Repeat domain-containing protein                       |     |
| CIMG_04900 | 11.35 | 1.63E-71 | 13.70 | 6.99E-45 | conserved hypothetical protein                                      |     |
| CIMG_04906 | 1.60  | 0.00040  | 1.82  | 0.00034  | protein phosphatase type 1b                                         |     |
| CIMG_04911 | 1.92  | 2.61E-06 | 3.14  | 2.64E-11 | conserved hypothetical protein                                      | *   |
| CIMG_04918 | 2.50  | 3.00E-13 | 2.27  | 1.77E-06 | phosphoprotein phosphatase                                          |     |
| CIMG_04934 | 6.88  | 4.11E-44 | 4.32  | 1.51E-12 | conserved hypothetical protein (HMG box)                            |     |
| CIMG_04945 | 6.13  | 1.04E-34 | 11.10 | 1.52E-20 | alcohol dehydrogenase                                               |     |
| CIMG_04966 | 1.84  | 0.00290  | 1.48  | 0.01375  | conserved hypothetical protein                                      | *   |
| CIMG_04967 | 4.68  | 3.88E-31 | 14.66 | 1.99E-43 | conserved hypothetical protein                                      | *   |
| CIMG_04968 | 3.55  | 3.55E-11 | 2.76  | 2.21E-06 | short-chain dehydrogenase                                           |     |
| CIMG_04969 | 1.83  | 0.00096  | 1.74  | 0.00453  | conserved hypothetical protein                                      |     |
| CIMG_04972 | 1.91  | 3.98E-07 | 1.29  | 0.00718  | cytochrome P450 monooxygenase                                       | *   |
| CIMG_04973 | 2.89  | 1.02E-14 | 1.74  | 0.00201  | F-box domain-containing protein                                     |     |
| CIMG_04976 | 2.60  | 8.69E-11 | 2.92  | 1.24E-10 | hypothetical protein (SH3 domain)                                   | S   |
| CIMG_04978 | 1.76  | 0.00005  | 5.06  | 1.62E-22 | chitobiase                                                          | * H |
| CIMG_04998 | 1.62  | 0.00444  | 1.53  | 0.04529  | conserved hypothetical protein                                      |     |
| CIMG_05030 | 1.53  | 0.00117  | 1.87  | 0.00011  | dynactin                                                            |     |
| CIMG_05057 | 4.00  | 3.71E-28 | 2.31  | 0.00083  | conserved hypothetical protein                                      | *   |
| CIMG_05088 | 1.57  | 0.00083  | 3.23  | 3.19E-13 | tryptophanyl-tRNA synthetase                                        |     |
| CIMG_05092 | 5.58  | 1.68E-31 | 4.86  | 8.28E-15 | conserved hypothetical protein                                      | +   |
| CIMG_05093 | 2.65  | 1.24E-15 | 2.71  | 2.38E-07 | meiosis induction protein kinase                                    |     |
| CIMG_05097 | 3.73  | 5.28E-26 | 4.73  | 4.74E-17 | conserved hypothetical protein                                      |     |
| CIMG_05099 | 2.45  | 3.56E-10 | 5.59  | 6.11E-22 | conserved hypothetical protein                                      | *   |
| CIMG_05106 | 1.90  | 7.29E-07 | 2.89  | 4.32E-12 | conserved hypothetical protein (NCS1 nucleoside transporter family) |     |
| CIMG_05121 | 3.39  | 4.45E-18 | 2.06  | 0.00007  | peroxin 14/17                                                       |     |
| CIMG_05168 | 6.65  | 1.41E-08 | 2.43  | 0.00901  | hemolysin-III channel protein Izh2                                  |     |
| CIMG_05173 | 5.06  | 5.19E-41 | 4.54  | 5.42E-19 | conserved hypothetical protein                                      |     |
| CIMG_05196 | 3.88  | 3.55E-24 | 2.07  | 0.00087  | carnitine acetyl transferase                                        |     |
| CIMG_05201 | 2.87  | 2.25E-17 | 1.59  | 0.00456  | BTN1 (major facilitator superfamily)                                |     |

\*: Predicted secreted;

+: Gene under positive selection [19]; G: Gene gained in *Coccidioides* [19]

H, S: Up-regulated in Hyphae or Spherule by microarray [18]

**Table S1: All genes up-regulated in saprobic phase**

|            |       |           |        |          |                                                                              |   |
|------------|-------|-----------|--------|----------|------------------------------------------------------------------------------|---|
| CIMG_05219 | 1.93  | 2.83E-06  | 1.65   | 0.00375  | conserved hypothetical protein (WD domain)                                   |   |
| CIMG_05224 | 1.79  | 4.34E-06  | 2.89   | 2.83E-10 | integral membrane protein                                                    |   |
| CIMG_05233 | 5.98  | 8.51E-21  | 7.68   | 7.56E-21 | conserved hypothetical protein                                               |   |
| CIMG_05234 | 5.97  | 1.44E-43  | 5.13   | 1.09E-13 | septin AspB                                                                  |   |
| CIMG_05239 | 7.89  | 3.17E-45  | 6.51   | 1.44E-19 | conserved hypothetical protein                                               |   |
| CIMG_05251 | 2.21  | 3.66E-06  | 1.85   | 0.00397  | transcription factor Tos4                                                    |   |
| CIMG_05254 | 34.15 | 6.56E-139 | 48.09  | 2.83E-56 | cell wall synthesis protein                                                  | * |
| CIMG_05274 | 2.20  | 7.08E-09  | 9.43   | 3.09E-44 | conserved hypothetical protein                                               | * |
| CIMG_05276 | 2.10  | 1.70E-08  | 2.07   | 3.59E-06 | serine/threonine-protein kinase RIO1                                         | S |
| CIMG_05279 | 1.55  | 0.00126   | 1.64   | 0.00442  | NADH-cytochrome b5 reductase 1                                               |   |
| CIMG_05280 | 1.54  | 0.00077   | 2.03   | 0.00015  | arginyl-tRNA synthetase                                                      |   |
| CIMG_05282 | 3.69  | 1.05E-16  | 10.34  | 3.12E-30 | conserved hypothetical protein                                               |   |
| CIMG_05283 | 4.88  | 4.96E-32  | 11.51  | 8.66E-44 | conserved hypothetical protein                                               |   |
| CIMG_05284 | 6.22  | 5.43E-51  | 10.09  | 7.40E-40 | conserved hypothetical protein                                               |   |
| CIMG_05286 | 1.62  | 0.04644   | 1.52   | 0.02780  | conserved hypothetical protein                                               |   |
| CIMG_05363 | 1.69  | 0.00077   | 7.46   | 3.25E-22 | conserved hypothetical protein                                               |   |
| CIMG_05372 | 2.59  | 5.03E-13  | 1.62   | 0.02288  | EBP domain-containing protein                                                |   |
| CIMG_05404 | 2.40  | 3.25E-08  | 2.91   | 1.98E-08 | conserved hypothetical protein                                               | * |
| CIMG_05412 | 1.74  | 0.00002   | 4.74   | 9.71E-21 | conserved hypothetical protein (phosphotransferase enzyme family)            |   |
| CIMG_05420 | 2.25  | 7.82E-10  | 2.32   | 8.45E-06 | conserved hypothetical protein                                               | * |
| CIMG_05427 | 1.85  | 1.13E-06  | 4.10   | 1.54E-17 | transcriptional corepressor Cyc8                                             |   |
| CIMG_05428 | 2.64  | 8.87E-07  | 3.62   | 6.25E-09 | conserved hypothetical protein                                               |   |
| CIMG_05429 | 4.08  | 6.48E-31  | 5.87   | 4.72E-28 | conserved hypothetical protein                                               |   |
| CIMG_05433 | 2.06  | 9.19E-08  | 1.80   | 0.00003  | dicer-like protein 2                                                         |   |
| CIMG_05439 | 1.73  | 0.00041   | 2.33   | 1.34E-06 | conserved hypothetical protein (fungal specific transcription factor domain) |   |
| CIMG_05458 | 1.42  | 0.00856   | 1.56   | 0.01055  | guanyl-nucleotide exchange factor                                            |   |
| CIMG_05472 | 1.59  | 0.00112   | 1.35   | 0.04737  | APSES transcription factor                                                   |   |
| CIMG_05486 | 3.12  | 1.20E-15  | 1.52   | 0.00713  | HEAT repeat protein                                                          |   |
| CIMG_05497 | 2.65  | 5.86E-14  | 1.95   | 0.00007  | conserved hypothetical protein                                               |   |
| CIMG_05502 | 2.21  | 6.88E-10  | 2.20   | 0.00002  | kinesin motor domain-containing protein                                      |   |
| CIMG_05518 | 5.42  | 3.45E-43  | 2.91   | 6.61E-11 | nuclear condensin complex subunit Smc4                                       |   |
| CIMG_05523 | 8.02  | 6.97E-31  | 7.15   | 1.16E-21 | conserved hypothetical protein                                               | * |
| CIMG_05525 | 2.98  | 7.12E-15  | 2.69   | 2.64E-08 | exonuclease                                                                  |   |
| CIMG_05528 | 2.04  | 0.00001   | 2.46   | 5.70E-06 | X-Pro dipeptidyl-peptidase                                                   | + |
| CIMG_05536 | 1.86  | 8.89E-07  | 1.33   | 0.04468  | oxidoreductase                                                               |   |
| CIMG_05544 | 2.03  | 2.97E-07  | 1.66   | 0.00605  | conserved hypothetical protein                                               |   |
| CIMG_05558 | 1.55  | 0.00174   | 1.99   | 0.00020  | conserved hypothetical protein                                               |   |
| CIMG_05570 | 15.46 | 4.31E-102 | 3.70   | 5.54E-10 | FAD binding domain-containing protein                                        |   |
| CIMG_05586 | 1.77  | 0.00004   | 6.31   | 1.15E-24 | methylated-DNA-protein-cysteine methyltransferase                            |   |
| CIMG_05593 | 2.57  | 6.33E-13  | 2.33   | 6.46E-07 | conserved hypothetical protein (MRC1-like domain)                            |   |
| CIMG_05597 | 9.86  | 2.29E-78  | 4.18   | 2.74E-17 | FAD-dependent oxygenase                                                      | * |
| CIMG_05604 | 1.47  | 0.00441   | 1.73   | 0.00161  | phytanoyl-CoA dioxygenase                                                    |   |
| CIMG_05619 | 11.12 | 2.17E-61  | 6.34   | 2.53E-16 | conserved hypothetical protein                                               |   |
| CIMG_05620 | 1.92  | 4.97E-07  | 5.38   | 1.94E-18 | conserved hypothetical protein                                               |   |
| CIMG_05635 | 2.11  | 3.38E-09  | 2.59   | 4.48E-08 | HORMA domain-containing protein                                              |   |
| CIMG_05637 | 3.79  | 1.90E-28  | 2.77   | 1.88E-07 | conserved hypothetical protein                                               |   |
| CIMG_05638 | 2.35  | 7.77E-12  | 2.41   | 3.86E-07 | conserved hypothetical protein                                               |   |
| CIMG_05642 | 1.52  | 0.01227   | 3.13   | 3.28E-08 | pyridoxal-phosphate dependent enzyme                                         |   |
| CIMG_05647 | 4.02  | 3.05E-29  | 4.18   | 1.01E-12 | class III chitin synthase                                                    |   |
| CIMG_05734 | 11.94 | 7.83E-79  | 123.67 | 4.29E-88 | conserved hypothetical protein                                               |   |
| CIMG_05771 | 7.05  | 1.01E-33  | 2.65   | 1.96E-07 | MFS multidrug transporter                                                    |   |
| CIMG_05794 | 5.17  | 1.72E-41  | 10.50  | 2.72E-36 | conserved hypothetical protein                                               |   |
| CIMG_05797 | 1.74  | 0.00002   | 1.49   | 0.01182  | tRNA-splicing endonuclease                                                   |   |
| CIMG_05801 | 1.35  | 0.04093   | 2.03   | 0.00002  | DUF803 domain-containing protein                                             |   |
| CIMG_05818 | 1.44  | 0.01216   | 8.51   | 1.77E-25 | GNAT family acetyltransferase                                                |   |
| CIMG_05832 | 1.42  | 0.01025   | 1.71   | 0.00104  | conserved hypothetical protein (putative C2HC5 type zinc finger motif)       |   |
| CIMG_05833 | 1.69  | 0.00066   | 2.41   | 5.80E-07 | conserved hypothetical protein                                               |   |
| CIMG_05862 | 1.41  | 0.00965   | 1.64   | 0.00426  | ubiquitin C-terminal hydrolase                                               |   |
| CIMG_05879 | 1.72  | 0.00020   | 4.70   | 8.85E-14 | conserved hypothetical protein                                               |   |
| CIMG_05881 | 1.74  | 0.00048   | 7.06   | 1.85E-16 | conserved hypothetical protein                                               | * |
| CIMG_05886 | 1.35  | 0.02646   | 1.62   | 0.01701  | tubulin gamma chain                                                          |   |
| CIMG_05888 | 1.68  | 0.00005   | 4.02   | 3.46E-14 | mannose-6-phosphate isomerase                                                |   |
| CIMG_05895 | 1.35  | 0.02515   | 1.40   | 0.04813  | actin                                                                        |   |
| CIMG_05946 | 1.90  | 3.07E-06  | 9.00   | 3.18E-33 | methyltransferase small domain-containing protein                            |   |
| CIMG_05947 | 7.64  | 1.96E-46  | 6.80   | 2.47E-21 | cell division control protein 14                                             |   |
| CIMG_05949 | 6.66  | 5.50E-25  | 14.76  | 3.88E-50 | sugar transporter                                                            |   |
| CIMG_05950 | 1.52  | 0.00104   | 4.50   | 1.03E-16 | geranylgeranyl pyrophosphate synthetase                                      |   |
| CIMG_05954 | 4.83  | 1.98E-12  | 1.77   | 0.00244  | tRNA a64-2'-O-ribosylphosphate transferase                                   |   |
| CIMG_05955 | 10.53 | 4.22E-68  | 3.88   | 5.57E-15 | HAD superfamily hydrolase                                                    |   |
| CIMG_05956 | 2.06  | 8.47E-06  | 5.74   | 3.59E-25 | conserved hypothetical protein                                               | * |

\*: Predicted secreted;

+: Gene under positive selection [19]; G: Gene gained in Coccidioides [19]

H, S: Up-regulated in Hyphae or Spherule by microarray [18]

**Table S1: All genes up-regulated in saprobic phase**

|            |       |           |       |          |                                                                       |              |
|------------|-------|-----------|-------|----------|-----------------------------------------------------------------------|--------------|
| CIMG_05958 | 1.36  | 0.02539   | 2.04  | 0.00009  | MutT/nudix family protein                                             |              |
| CIMG_05962 | 3.08  | 5.02E-18  | 13.79 | 2.30E-31 | conserved hypothetical protein                                        |              |
| CIMG_05968 | 2.81  | 1.80E-15  | 1.84  | 0.00012  | dolichyl-phosphate beta-glucosyltransferase                           |              |
| CIMG_05975 | 12.99 | 9.89E-08  | 2.32  | 0.04669  | conserved hypothetical protein (putative hydantoinase B/oxoprolinase) |              |
| CIMG_05981 | 2.89  | 5.14E-17  | 2.08  | 0.00005  | K+ homeostasis protein Kha1                                           |              |
| CIMG_05982 | 2.32  | 1.71E-11  | 1.65  | 0.00695  | peroxin 3                                                             |              |
| CIMG_05985 | 2.83  | 5.67E-13  | 3.11  | 4.28E-10 | RfxA                                                                  |              |
| CIMG_05992 | 1.58  | 0.00990   | 1.53  | 0.00793  | conserved hypothetical protein                                        |              |
| CIMG_05993 | 1.78  | 0.00007   | 2.52  | 1.57E-07 | DUF89 domain-containing protein                                       |              |
| CIMG_05994 | 2.36  | 9.14E-12  | 2.80  | 1.73E-09 | serine/threonine protein phosphatase PPT1                             |              |
| CIMG_06003 | 1.73  | 0.00061   | 1.54  | 0.00542  | SNF2 family helicase/ATPase                                           |              |
| CIMG_06012 | 1.78  | 0.00005   | 1.71  | 0.00028  | C2H2 transcription factor                                             |              |
| CIMG_06031 | 1.55  | 0.00086   | 1.51  | 0.03416  | adenosine kinase                                                      |              |
| CIMG_06036 | 13.32 | 3.81E-94  | 4.87  | 4.22E-24 | DNA repair and transcription factor Ada                               | <b>H</b>     |
| CIMG_06043 | 1.92  | 1.84E-06  | 1.91  | 0.00006  | RSC complex subunit                                                   |              |
| CIMG_06051 | 1.59  | 0.00048   | 1.49  | 0.01243  | sucrose transporter                                                   |              |
| CIMG_06070 | 2.44  | 1.77E-12  | 1.54  | 0.00870  | homoserine O-acetyltransferase                                        |              |
| CIMG_06092 | 4.08  | 1.99E-17  | 2.31  | 0.00012  | O-methyltransferase                                                   | <b>+ G H</b> |
| CIMG_06109 | 2.03  | 1.40E-08  | 1.78  | 0.00040  | CCR4-NOT transcription complex subunit 7                              |              |
| CIMG_06113 | 13.10 | 1.90E-95  | 2.41  | 8.53E-06 | phenylacetyl-CoA ligase                                               |              |
| CIMG_06116 | 2.08  | 9.78E-09  | 2.17  | 1.21E-06 | GTPase activating protein                                             |              |
| CIMG_06133 | 1.49  | 0.02062   | 1.84  | 0.00073  | conserved hypothetical protein (DUF2439)                              |              |
| CIMG_06134 | 2.56  | 5.51E-14  | 2.69  | 2.87E-08 | conserved hypothetical protein (methyltransferase domain)             |              |
| CIMG_06135 | 7.47  | 1.17E-59  | 4.41  | 6.23E-14 | UMTA methyltransferase                                                |              |
| CIMG_06137 | 19.73 | 5.10E-117 | 5.51  | 8.05E-26 | conserved hypothetical protein (Cytochrome P450)                      | <b>*</b>     |
| CIMG_06153 | 1.98  | 2.34E-07  | 2.77  | 1.11E-08 | putative membrane protein (DUF914)                                    |              |
| CIMG_06164 | 2.87  | 1.45E-10  | 5.15  | 6.09E-14 | conserved hypothetical protein                                        |              |
| CIMG_06167 | 1.64  | 0.00021   | 2.10  | 0.00005  | cadmium factor                                                        |              |
| CIMG_06170 | 8.39  | 1.75E-67  | 8.74  | 1.12E-33 | conserved hypothetical protein                                        |              |
| CIMG_06181 | 3.58  | 2.55E-22  | 3.41  | 5.31E-13 | pyridoxine biosynthesis protein PDX1                                  |              |
| CIMG_06186 | 10.76 | 5.94E-83  | 43.14 | 1.25E-67 | lysine amidinotransferase                                             |              |
| CIMG_06188 | 10.48 | 2.31E-50  | 3.13  | 4.06E-07 | cytochrome P450 monooxygenase                                         |              |
| CIMG_06190 | 1.72  | 0.00004   | 1.52  | 0.02227  | arginine biosynthesis protein ArgJ                                    |              |
| CIMG_06201 | 1.78  | 0.00012   | 2.61  | 1.05E-08 | alpha 1,2-mannosyltransferase Smp3                                    | <b>*</b>     |
| CIMG_06209 | 2.00  | 9.96E-08  | 2.04  | 0.00205  | translation initiation factor eIF-6                                   |              |
| CIMG_06213 | 1.91  | 3.44E-07  | 1.73  | 0.00586  | conserved hypothetical protein                                        |              |
| CIMG_06224 | 3.92  | 3.64E-23  | 1.50  | 0.01268  | RNA processing factor 1                                               |              |
| CIMG_06225 | 1.85  | 2.03E-06  | 1.55  | 0.02791  | glycyl-tRNA synthetase                                                |              |
| CIMG_06227 | 1.36  | 0.02665   | 1.70  | 0.00176  | serine/threonine-protein kinase CLA4                                  | <b>S</b>     |
| CIMG_06245 | 1.51  | 0.00257   | 3.67  | 7.26E-14 | conserved hypothetical protein                                        |              |
| CIMG_06255 | 2.05  | 2.70E-08  | 1.68  | 0.00312  | RuvB-like helicase 2                                                  |              |
| CIMG_06267 | 4.83  | 4.26E-32  | 6.84  | 5.60E-32 | conserved hypothetical protein                                        |              |
| CIMG_06288 | 1.85  | 0.00095   | 1.94  | 0.04795  | plasma membrane ATPase                                                |              |
| CIMG_06293 | 2.04  | 1.01E-07  | 1.87  | 3.02E-06 | conserved hypothetical protein (RNA recognition motif)                |              |
| CIMG_06301 | 9.99  | 2.08E-66  | 2.91  | 3.09E-08 | conserved hypothetical protein (DUF2503)                              |              |
| CIMG_06323 | 1.91  | 0.00078   | 2.32  | 3.38E-06 | pumilio-family RNA binding repeat protein                             |              |
| CIMG_06324 | 2.07  | 1.95E-07  | 1.90  | 0.00003  | conserved hypothetical protein                                        |              |
| CIMG_06335 | 4.13  | 3.28E-14  | 2.15  | 0.00078  | conserved hypothetical protein                                        |              |
| CIMG_06344 | 34.21 | 2.08E-139 | 71.53 | 2.08E-89 | conserved hypothetical protein                                        |              |
| CIMG_06347 | 1.69  | 0.00028   | 2.13  | 2.49E-07 | GTP cyclohydrolase II                                                 |              |
| CIMG_06348 | 1.57  | 0.00135   | 1.45  | 0.03992  | transcription elongation factor 1                                     |              |
| CIMG_06352 | 1.55  | 0.00039   | 1.96  | 0.00005  | seryl-tRNA synthetase                                                 |              |
| CIMG_06381 | 1.42  | 0.00905   | 1.63  | 0.00101  | conserved hypothetical protein                                        |              |
| CIMG_06386 | 1.52  | 0.00159   | 2.24  | 1.35E-06 | conserved hypothetical protein (Myb-like DNA-binding domain)          |              |
| CIMG_06397 | 2.02  | 8.06E-08  | 2.09  | 0.00003  | Conserved hypothetical protein (RNA recognition motif, R3H domain)    |              |
| CIMG_06408 | 9.72  | 4.00E-74  | 2.08  | 0.00014  | monosaccharide transporter                                            |              |
| CIMG_06422 | 4.65  | 8.91E-38  | 1.66  | 0.01015  | AMP dependent CoA ligase                                              |              |
| CIMG_06431 | 1.92  | 2.63E-07  | 1.58  | 0.01119  | nuclear condensin complex subunit 3                                   |              |
| CIMG_06436 | 5.24  | 6.89E-24  | 3.04  | 2.03E-10 | conserved hypothetical protein                                        |              |
| CIMG_06453 | 1.93  | 1.63E-07  | 2.02  | 0.00011  | farnesyl-pyrophosphate synthetase                                     |              |
| CIMG_06457 | 7.83  | 8.38E-25  | 2.58  | 2.95E-06 | conserved hypothetical protein                                        |              |
| CIMG_06465 | 1.51  | 0.00167   | 1.74  | 0.00125  | histone acetylase complex subunit Paf400                              |              |
| CIMG_06469 | 11.30 | 4.60E-73  | 1.65  | 0.00346  | MFS multidrug transporter                                             |              |
| CIMG_06480 | 2.10  | 7.75E-07  | 1.63  | 0.01098  | conserved hypothetical protein (DUF1996)                              | <b>*</b>     |
| CIMG_06488 | 1.54  | 0.00228   | 1.51  | 0.04059  | NAP family protein                                                    |              |
| CIMG_06501 | 3.52  | 0.00156   | 3.79  | 0.03583  | hypothetical protein                                                  |              |
| CIMG_06502 | 3.16  | 4.67E-22  | 1.58  | 0.02360  | conserved hypothetical protein                                        | <b>*</b>     |
| CIMG_06506 | 3.30  | 6.21E-08  | 4.10  | 3.44E-11 | conserved hypothetical protein                                        |              |
| CIMG_06510 | 4.19  | 5.41E-31  | 3.26  | 1.17E-09 | Sep5a (septin)                                                        |              |
| CIMG_06514 | 2.11  | 1.54E-09  | 2.11  | 3.67E-06 | exonuclease Kem1                                                      |              |

\*: Predicted secreted;

+: Gene under positive selection [19]; G: Gene gained in Coccidioides [19]

H, S: Up-regulated in Hyphae or Spherule by microarray [18]

**Table S1: All genes up-regulated in saprobic phase**

|            |       |           |        |          |                                                                              |   |
|------------|-------|-----------|--------|----------|------------------------------------------------------------------------------|---|
| CIMG_06524 | 1.82  | 0.00001   | 5.63   | 1.09E-26 | conserved hypothetical protein (Dynamain family)                             |   |
| CIMG_06535 | 1.54  | 0.00431   | 1.82   | 0.00039  | conserved hypothetical protein                                               |   |
| CIMG_06537 | 1.46  | 0.00667   | 1.56   | 0.04733  | conserved hypothetical protein (emp24/gp25L/p24 family)                      | * |
| CIMG_06540 | 3.37  | 7.73E-15  | 2.56   | 2.00E-08 | conserved hypothetical protein                                               |   |
| CIMG_06543 | 2.86  | 1.03E-13  | 2.52   | 5.80E-08 | microsomal signal peptidase subunit                                          | * |
| CIMG_06553 | 4.77  | 1.20E-32  | 4.46   | 6.34E-20 | putative SH3 domain protein Cyk3                                             |   |
| CIMG_06555 | 1.58  | 0.00059   | 1.49   | 0.03293  | PHD transcription factor                                                     |   |
| CIMG_06558 | 1.87  | 0.00014   | 15.46  | 1.50E-48 | conserved hypothetical protein (major facilitator superfamily)               |   |
| CIMG_06560 | 1.64  | 0.00028   | 1.49   | 0.01308  | methylenetetrahydrofolate reductase                                          |   |
| CIMG_06563 | 1.86  | 1.19E-06  | 1.69   | 0.00099  | alpha glucosidase II                                                         | * |
| CIMG_06566 | 7.47  | 7.94E-16  | 4.39   | 3.74E-08 | endo-1,3(4)-beta-glucanase                                                   | * |
| CIMG_06576 | 1.51  | 0.01252   | 2.34   | 3.87E-06 | conserved hypothetical protein                                               |   |
| CIMG_06582 | 3.16  | 2.12E-18  | 2.69   | 3.44E-10 | phosphatidylinositol transfer protein SFH5                                   |   |
| CIMG_06584 | 3.80  | 9.70E-29  | 4.64   | 1.36E-17 | conserved hypothetical protein                                               | * |
| CIMG_06593 | 4.97  | 5.24E-30  | 2.82   | 1.56E-08 | conserved hypothetical protein                                               |   |
| CIMG_06597 | 1.55  | 0.00070   | 1.86   | 0.00007  | signal recognition particle protein SRP54                                    |   |
| CIMG_06601 | 3.08  | 6.66E-21  | 3.31   | 3.24E-12 | bZIP transcription factor HapX                                               |   |
| CIMG_06602 | 4.60  | 1.01E-30  | 8.51   | 3.47E-22 | O-methyltransferase                                                          |   |
| CIMG_06611 | 1.61  | 0.00024   | 1.94   | 0.00008  | ceramide glucosyltransferase                                                 |   |
| CIMG_06615 | 60.20 | 1.37E-141 | 127.92 | 5.63E-60 | conserved hypothetical protein (putative fungal hydrophobin)                 | * |
| CIMG_06623 | 3.18  | 2.24E-20  | 2.42   | 1.97E-06 | ABC transporter                                                              |   |
| CIMG_06625 | 5.91  | 1.74E-13  | 2.81   | 2.36E-06 | conserved hypothetical protein                                               |   |
| CIMG_06631 | 4.63  | 6.54E-14  | 15.30  | 5.59E-35 | zinc binding enoyl reductase                                                 |   |
| CIMG_06637 | 2.11  | 2.74E-09  | 2.18   | 4.41E-06 | aspartyl aminopeptidase                                                      |   |
| CIMG_06654 | 1.69  | 0.00011   | 3.95   | 3.77E-17 | DUF1688 domain-containing protein                                            |   |
| CIMG_06655 | 1.81  | 0.00004   | 1.53   | 0.00240  | small monomeric GTPase                                                       |   |
| CIMG_06667 | 2.19  | 1.23E-09  | 3.37   | 3.11E-12 | serine/threonine protein phosphatase 2B catalytic subunit                    |   |
| CIMG_06674 | 1.45  | 0.00871   | 1.51   | 0.00249  | beige/BEACH domain-containing protein                                        |   |
| CIMG_06681 | 2.34  | 9.49E-12  | 2.39   | 7.94E-11 | DUF1620 domain-containing protein                                            | * |
| CIMG_06685 | 1.87  | 7.05E-07  | 1.54   | 0.00853  | Transmembrane amino acid transporter                                         |   |
| CIMG_06690 | 1.52  | 0.00198   | 1.58   | 0.00235  | ATP-dependent bile acid permease                                             |   |
| CIMG_06700 | 3.86  | 2.12E-10  | 6.11   | 7.37E-14 | conserved hypothetical protein                                               | * |
| CIMG_06716 | 6.75  | 4.08E-54  | 6.68   | 6.40E-19 | conserved hypothetical protein                                               |   |
| CIMG_06724 | 2.35  | 1.21E-12  | 2.66   | 7.66E-11 | isovaleryl-CoA dehydrogenase                                                 |   |
| CIMG_06727 | 1.58  | 0.00158   | 4.52   | 8.52E-12 | D-arabinitol dehydrogenase ArbD                                              |   |
| CIMG_06738 | 20.54 | 2.00E-81  | 5.39   | 3.86E-11 | woronin body major protein                                                   | H |
| CIMG_06741 | 2.01  | 3.93E-08  | 1.97   | 0.00002  | LAP2 (peptidase family M28)                                                  | * |
| CIMG_06772 | 1.47  | 0.00331   | 1.61   | 0.00303  | pre-mRNA-splicing factor isy1                                                |   |
| CIMG_06776 | 1.36  | 0.02810   | 1.61   | 0.00531  | vacuolar-type H <sup>+</sup> -ATPase subunit C                               |   |
| CIMG_06778 | 3.96  | 3.04E-26  | 4.78   | 3.33E-15 | septin-1                                                                     |   |
| CIMG_06793 | 5.85  | 1.90E-19  | 2.08   | 0.00317  | conserved hypothetical protein                                               |   |
| CIMG_06818 | 2.24  | 1.77E-10  | 1.86   | 0.00219  | G-alpha subunit                                                              |   |
| CIMG_06821 | 3.23  | 2.59E-16  | 1.59   | 0.03043  | 4-coumarate-CoA ligase                                                       |   |
| CIMG_06823 | 1.42  | 0.00412   | 1.60   | 0.00396  | nucleoporin                                                                  |   |
| CIMG_06848 | 1.92  | 1.12E-07  | 1.91   | 0.00013  | STU1                                                                         |   |
| CIMG_06851 | 1.33  | 0.02802   | 1.75   | 0.00606  | siderophore biosynthesis acetylase AceI                                      |   |
| CIMG_06852 | 1.47  | 0.00322   | 1.51   | 0.02903  | ABC multidrug transporter Mdr4                                               |   |
| CIMG_06859 | 3.19  | 2.34E-22  | 1.65   | 0.00141  | zinc metalloproteinase                                                       |   |
| CIMG_06868 | 1.61  | 0.00877   | 1.70   | 0.00170  | copper amine oxidase 1                                                       |   |
| CIMG_06880 | 2.93  | 3.04E-14  | 2.22   | 0.00005  | conserved hypothetical protein                                               |   |
| CIMG_06892 | 8.00  | 1.34E-24  | 3.24   | 9.67E-10 | amidohydrolase                                                               |   |
| CIMG_06928 | 6.13  | 1.68E-35  | 4.54   | 1.73E-09 | tubulin beta chain                                                           |   |
| CIMG_06932 | 1.84  | 1.45E-06  | 1.54   | 0.01046  | MAP kinase kinase kinase SskB                                                |   |
| CIMG_06933 | 1.63  | 0.00070   | 2.34   | 7.72E-06 | vesicle-mediated transporter Vid24 (vacuolar import and degradation protein) |   |
| CIMG_06940 | 2.14  | 4.84E-09  | 2.05   | 8.27E-06 | serine/threonine protein kinase Kin1                                         |   |
| CIMG_06966 | 2.69  | 1.00E-11  | 1.85   | 0.00116  | 3-ketosphinganine reductase                                                  |   |
| CIMG_06971 | 2.01  | 5.21E-08  | 1.88   | 0.00049  | conserved hypothetical protein (transmembrane protein precursor)             | * |
| CIMG_06977 | 2.44  | 4.46E-12  | 1.91   | 0.00011  | RNA export mediator Gle1                                                     |   |
| CIMG_06978 | 1.45  | 0.00565   | 2.30   | 6.19E-07 | myosin class II heavy chain                                                  |   |
| CIMG_06981 | 2.00  | 2.60E-07  | 1.59   | 0.00834  | endosomal cargo receptor (emp24/gp25L/p24 family)                            | * |
| CIMG_06985 | 1.95  | 7.72E-06  | 1.95   | 0.00138  | conserved hypothetical protein                                               |   |
| CIMG_06988 | 1.42  | 0.01757   | 1.63   | 0.00179  | conserved hypothetical protein (fungal specific transcription factor domain) |   |
| CIMG_07006 | 1.83  | 2.25E-06  | 1.59   | 0.01279  | COPII-coated vesicle protein SurF4/Erv29 (SURF4 family)                      |   |
| CIMG_07037 | 4.90  | 1.23E-27  | 10.34  | 4.33E-25 | conserved hypothetical protein                                               |   |
| CIMG_07042 | 2.25  | 8.68E-10  | 3.76   | 2.59E-10 | HMG box protein                                                              |   |
| CIMG_07049 | 2.72  | 4.22E-16  | 4.42   | 5.87E-16 | NAD(P) transhydrogenase                                                      |   |
| CIMG_07066 | 2.23  | 0.00180   | 10.62  | 8.82E-22 | conserved hypothetical protein                                               | * |
| CIMG_07071 | 2.26  | 2.55E-11  | 2.10   | 8.11E-06 | conserved hypothetical protein                                               |   |
| CIMG_07077 | 1.65  | 0.01822   | 1.44   | 0.02993  | conserved hypothetical protein                                               |   |
| CIMG_07093 | 2.79  | 1.94E-16  | 1.70   | 0.00496  | exosome complex exonuclease exoribonuclease                                  |   |

\*: Predicted secreted;

+: Gene under positive selection [19]; G: Gene gained in *Coccidioides* [19]

H, S: Up-regulated in Hyphae or Spherule by microarray [18]

**Table S1: All genes up-regulated in saprobic phase**

|            |        |           |       |          |                                                                                   |   |
|------------|--------|-----------|-------|----------|-----------------------------------------------------------------------------------|---|
| CIMG_07100 | 1.72   | 0.00011   | 2.32  | 3.72E-06 | PAB1 binding protein                                                              |   |
| CIMG_07103 | 25.53  | 7.08E-68  | 5.44  | 5.60E-12 | stress responsive A/B barrel domain-containing protein                            |   |
| CIMG_07109 | 1.90   | 2.84E-06  | 1.65  | 0.01327  | conserved hypothetical protein (putative SUR7 protein)                            |   |
| CIMG_07132 | 2.27   | 1.02E-07  | 1.44  | 0.00694  | conserved hypothetical protein (PPR repeat)                                       |   |
| CIMG_07138 | 1.81   | 7.58E-06  | 2.15  | 0.00050  | conserved hypothetical protein                                                    |   |
| CIMG_07163 | 1.49   | 0.00555   | 1.64  | 0.00321  | hydrolase                                                                         |   |
| CIMG_07170 | 1.89   | 0.00004   | 2.61  | 5.42E-06 | conserved hypothetical protein                                                    |   |
| CIMG_07174 | 3.53   | 6.47E-25  | 3.82  | 1.14E-15 | methionyl-tRNA synthetase                                                         |   |
| CIMG_07183 | 1.55   | 0.00077   | 1.96  | 0.00108  | conserved hypothetical protein                                                    |   |
| CIMG_07194 | 2.65   | 2.26E-09  | 3.01  | 1.75E-08 | conserved hypothetical protein (putative chromosome segregation protein Spc25)    |   |
| CIMG_07196 | 3.60   | 7.99E-25  | 3.07  | 1.52E-08 | septin 3                                                                          |   |
| CIMG_07197 | 2.80   | 4.99E-17  | 1.88  | 0.00022  | guanylate kinase                                                                  |   |
| CIMG_07209 | 7.45   | 1.18E-61  | 21.62 | 7.77E-59 | conserved hypothetical protein                                                    |   |
| CIMG_07215 | 1.45   | 0.00772   | 1.80  | 0.00060  | exportin KapK                                                                     |   |
| CIMG_07221 | 1.69   | 0.00008   | 1.89  | 0.00125  | DRE2 (Anamorsin family)                                                           |   |
| CIMG_07222 | 1.78   | 7.01E-06  | 1.68  | 0.00029  | conserved hypothetical protein (Nup133-like)                                      |   |
| CIMG_07226 | 2.03   | 8.30E-08  | 1.52  | 0.00392  | imidazole glycerol phosphate synthase hisHF                                       |   |
| CIMG_07257 | 1.72   | 0.00003   | 1.77  | 0.00010  | histone-lysine N-methyltransferase                                                |   |
| CIMG_07258 | 1.45   | 0.02001   | 3.07  | 5.57E-07 | glucosamine-fructose-6-phosphate aminotransferase                                 |   |
| CIMG_07261 | 2.74   | 8.27E-08  | 8.10  | 7.82E-26 | conserved hypothetical protein                                                    |   |
| CIMG_07266 | 1.63   | 0.00010   | 2.80  | 6.65E-10 | Putative ral1 binding protein 1                                                   |   |
| CIMG_07268 | 1.60   | 0.00039   | 1.52  | 0.03943  | pre-rRNA-processing protein PNO1                                                  |   |
| CIMG_07271 | 1.41   | 0.00890   | 1.53  | 0.03156  | proteasome component Pre4                                                         |   |
| CIMG_07277 | 1.65   | 0.00024   | 4.02  | 5.28E-19 | extracellular triacylglycerol lipase                                              | * |
| CIMG_07285 | 5.74   | 1.33E-37  | 8.19  | 2.75E-28 | conserved hypothetical protein                                                    |   |
| CIMG_07289 | 1.65   | 0.00037   | 4.93  | 4.69E-09 | major facilitator superfamily transporter                                         |   |
| CIMG_07290 | 5.58   | 2.78E-40  | 6.51  | 1.56E-17 | eukaryotic phosphomannomutase                                                     |   |
| CIMG_07298 | 3.15   | 1.05E-21  | 2.81  | 5.31E-09 | peptide synthetase                                                                |   |
| CIMG_07299 | 43.69  | 5.61E-137 | 1.48  | 0.03559  | conserved hypothetical protein (putative FAD dependent oxidoreductase)            |   |
| CIMG_07303 | 22.35  | 2.01E-120 | 25.51 | 5.27E-60 | prp 4 (CRoW domain-containing protein)                                            | * |
| CIMG_07313 | 7.32   | 1.27E-30  | 15.79 | 2.32E-50 | conserved hypothetical protein (type IV conjugative transfer system protein TraI) |   |
| CIMG_07314 | 2.75   | 2.99E-10  | 7.23  | 4.27E-24 | tyrosinase                                                                        | * |
| CIMG_07326 | 2.45   | 7.47E-13  | 2.83  | 7.07E-09 | peptidase (peptidase family M20/M25/M40)                                          | * |
| CIMG_07327 | 1.56   | 0.00116   | 1.47  | 0.04327  | translocon-associated protein                                                     | * |
| CIMG_07346 | 3.63   | 7.76E-20  | 2.15  | 0.00001  | conserved hypothetical protein                                                    |   |
| CIMG_07348 | 1.95   | 2.31E-06  | 6.46  | 5.50E-32 | chitinase 4                                                                       | * |
| CIMG_07460 | 1.45   | 0.00714   | 2.27  | 3.74E-08 | kinesin family protein                                                            |   |
| CIMG_07461 | 1.56   | 0.01269   | 1.40  | 0.00849  | conserved hypothetical protein                                                    |   |
| CIMG_07494 | 3.13   | 2.64E-20  | 1.94  | 0.00003  | condensin complex component cnd2                                                  |   |
| CIMG_07495 | 1.49   | 0.00182   | 2.92  | 3.74E-09 | conserved hypothetical protein                                                    |   |
| CIMG_07502 | 2.99   | 7.83E-19  | 2.19  | 4.00E-06 | conserved hypothetical protein                                                    | * |
| CIMG_07520 | 2.21   | 1.57E-09  | 3.30  | 8.27E-13 | serine/threonine-protein kinase chk2                                              |   |
| CIMG_07523 | 2.32   | 2.26E-06  | 1.97  | 0.00060  | cell division control protein Cdc6                                                |   |
| CIMG_07524 | 1.85   | 3.06E-06  | 4.48  | 1.93E-19 | Putative rho-GTPase-activating protein 8                                          |   |
| CIMG_07527 | 2.45   | 7.89E-09  | 1.79  | 0.00270  | peroxin 10                                                                        |   |
| CIMG_07531 | 1.39   | 0.01700   | 1.96  | 0.00002  | cyclin-dependent protein kinase complex component                                 | + |
| CIMG_07552 | 8.59   | 5.36E-65  | 1.73  | 0.00391  | phenylacetyl-CoA ligase                                                           |   |
| CIMG_07554 | 7.52   | 7.43E-48  | 5.45  | 1.11E-22 | conserved hypothetical protein                                                    |   |
| CIMG_07556 | 256.26 | 6.94E-230 | 75.50 | 6.37E-84 | conserved hypothetical protein (Acetyltransferase (GNAT) family)                  |   |
| CIMG_07557 | 35.37  | 1.06E-148 | 22.83 | 1.39E-51 | conserved hypothetical protein (Pyridine nucleotide-disulphide oxidoreductase)    |   |
| CIMG_07558 | 3.35   | 3.69E-24  | 3.67  | 1.30E-14 | beta-N-acetylglucosaminidase                                                      |   |
| CIMG_07569 | 4.01   | 2.19E-14  | 1.72  | 0.00508  | allantoate permease                                                               |   |
| CIMG_07577 | 1.79   | 1.27E-06  | 5.48  | 9.28E-21 | conserved hypothetical protein (methyltransferase domain)                         |   |
| CIMG_07578 | 2.34   | 6.52E-07  | 10.98 | 1.08E-35 | conserved hypothetical protein                                                    |   |
| CIMG_07580 | 4.27   | 4.82E-23  | 5.64  | 5.15E-22 | conserved hypothetical protein (DUF202 superfamily)                               |   |
| CIMG_07581 | 2.64   | 1.06E-13  | 2.40  | 6.53E-06 | zinc homeostasis factor 1                                                         | * |
| CIMG_07582 | 1.48   | 0.00322   | 1.76  | 0.00062  | manganese ion homeostasis                                                         |   |
| CIMG_07588 | 5.75   | 2.24E-40  | 4.07  | 1.04E-15 | checkpoint protein kinase                                                         |   |
| CIMG_07599 | 1.41   | 0.01953   | 1.63  | 0.01013  | MRS7 family protein                                                               |   |
| CIMG_07616 | 1.95   | 2.66E-07  | 1.79  | 0.00014  | 4-nitrophenylphosphatase                                                          |   |
| CIMG_07618 | 2.10   | 1.31E-09  | 1.63  | 0.00736  | ATP-dependent Clp protease proteolytic subunit                                    |   |
| CIMG_07622 | 5.90   | 1.92E-16  | 2.55  | 0.00076  | conserved hypothetical protein                                                    |   |
| CIMG_07624 | 1.97   | 0.00002   | 1.78  | 0.00156  | protein transport membrane glycoprotein Sec20                                     |   |
| CIMG_07634 | 2.15   | 9.00E-07  | 2.14  | 0.00069  | conserved hypothetical protein (VMA21-like domain)                                |   |
| CIMG_07649 | 1.38   | 0.02425   | 2.14  | 2.08E-07 | tubulin-specific chaperone c                                                      |   |
| CIMG_07653 | 9.15   | 4.04E-69  | 93.26 | 7.07E-73 | conserved hypothetical protein (RNA recognition motif)                            |   |
| CIMG_07658 | 5.72   | 7.64E-34  | 2.83  | 7.60E-08 | MFS drug transporter                                                              |   |

\*: Predicted secreted;

+: Gene under positive selection [19]; G: Gene gained in Coccidioides [19]

H, S: Up-regulated in Hyphae or Spherule by microarray [18]

**Table S1: All genes up-regulated in saprobic phase**

|            |       |           |       |          |                                                                                     |     |
|------------|-------|-----------|-------|----------|-------------------------------------------------------------------------------------|-----|
| CIMG_07667 | 3.46  | 1.80E-21  | 4.71  | 1.22E-19 | morphogenesis protein                                                               |     |
| CIMG_07686 | 1.31  | 0.04105   | 1.41  | 0.03416  | proteasome regulatory particle subunit                                              |     |
| CIMG_07689 | 2.34  | 1.42E-08  | 1.66  | 0.00030  | translation repressor/antiviral protein Ski3                                        |     |
| CIMG_07690 | 4.03  | 6.79E-29  | 2.98  | 2.96E-12 | glycosyl hydrolase                                                                  |     |
| CIMG_07697 | 1.48  | 0.00905   | 1.58  | 0.00276  | transcriptional regulator                                                           |     |
| CIMG_07708 | 2.00  | 2.12E-06  | 3.49  | 4.15E-08 | Heterokaryon incompatibility protein Het-C                                          | *   |
| CIMG_07732 | 1.81  | 0.00006   | 4.07  | 9.10E-13 | conserved hypothetical protein                                                      |     |
| CIMG_07738 | 9.27  | 2.07E-71  | 21.32 | 7.58E-42 | conserved hypothetical protein                                                      | * + |
| CIMG_07739 | 1.57  | 0.02138   | 2.54  | 5.01E-10 | multicopper oxidase                                                                 |     |
| CIMG_07761 | 1.88  | 8.62E-07  | 1.58  | 0.01391  | UDP-N-acetylglucosamine pyrophosphorylase                                           |     |
| CIMG_07775 | 3.44  | 3.01E-16  | 7.17  | 6.46E-35 | conserved hypothetical protein (Glycerophosphoryl diester phosphodiesterase family) |     |
| CIMG_07808 | 1.62  | 0.00033   | 1.49  | 0.03050  | nuclear pore complex subunit Nup85                                                  |     |
| CIMG_07809 | 3.04  | 1.26E-07  | 4.04  | 4.24E-09 | conserved hypothetical protein                                                      |     |
| CIMG_07811 | 17.27 | 1.53E-106 | 6.21  | 1.98E-14 | ESDC                                                                                |     |
| CIMG_07819 | 2.23  | 2.06E-09  | 1.77  | 0.02190  | fatty acid activator Faa4                                                           |     |
| CIMG_07821 | 3.61  | 3.92E-12  | 7.11  | 2.17E-23 | conserved hypothetical protein (NDT80 / PhoG like DNA-binding family)               |     |
| CIMG_07827 | 2.13  | 2.90E-09  | 1.77  | 0.00097  | arf GTPase-activating protein                                                       |     |
| CIMG_07839 | 14.42 | 7.29E-93  | 53.92 | 4.29E-58 | conserved hypothetical protein                                                      | *   |
| CIMG_07855 | 3.65  | 7.92E-24  | 11.68 | 1.88E-25 | siderochrome-iron transporter Sit1                                                  |     |
| CIMG_07859 | 2.09  | 2.03E-08  | 1.82  | 0.00013  | Conserved hypothetical protein (DUF833)                                             |     |
| CIMG_07863 | 1.77  | 0.00001   | 2.90  | 1.52E-07 | conserved hypothetical protein (acyltransferase family)                             |     |
| CIMG_07868 | 1.56  | 0.00051   | 2.34  | 9.22E-07 | NADPH oxidase regulator NoxR                                                        |     |
| CIMG_07883 | 1.66  | 0.00010   | 1.95  | 2.44E-06 | DNA repair and recombination protein RAD26                                          |     |
| CIMG_07889 | 3.43  | 1.31E-23  | 2.31  | 4.96E-07 | DNA polymerase alpha catalytic subunit                                              |     |
| CIMG_07897 | 2.52  | 8.32E-13  | 1.84  | 0.00088  | C2H2 zinc finger transcription factor                                               |     |
| CIMG_07907 | 1.96  | 3.50E-07  | 4.74  | 5.21E-16 | mannitol-1-phosphate dehydrogenase                                                  | +   |
| CIMG_07914 | 1.63  | 0.00034   | 1.72  | 0.00168  | SAGA complex subunit                                                                |     |
| CIMG_07925 | 2.87  | 2.69E-08  | 8.41  | 1.08E-21 | conserved hypothetical protein                                                      |     |
| CIMG_07934 | 1.42  | 0.00824   | 2.25  | 9.63E-08 | U-box domain-containing protein                                                     |     |
| CIMG_07935 | 1.79  | 0.00008   | 3.34  | 1.72E-08 | conserved hypothetical protein (Acyl CoA binding protein)                           |     |
| CIMG_07940 | 8.22  | 6.79E-63  | 3.84  | 1.83E-13 | pH response protein Palf                                                            |     |
| CIMG_07942 | 1.97  | 4.87E-08  | 2.21  | 0.00933  | conserved hypothetical protein                                                      |     |
| CIMG_07950 | 2.30  | 7.78E-10  | 1.95  | 0.00187  | methyltransferase                                                                   |     |
| CIMG_07963 | 1.36  | 0.02214   | 2.38  | 1.45E-06 | GPI mannosyltransferase 3                                                           |     |
| CIMG_07967 | 2.82  | 5.00E-07  | 3.77  | 5.95E-13 | conserved hypothetical protein                                                      |     |
| CIMG_07980 | 1.96  | 3.90E-08  | 1.93  | 0.00007  | nuclear condensin complex subunit Smc2                                              |     |
| CIMG_07984 | 1.31  | 0.03991   | 3.51  | 7.58E-12 | conserved hypothetical protein (Tetratricopeptide repeat)                           |     |
| CIMG_07993 | 1.88  | 5.50E-06  | 1.94  | 0.00009  | actin binding protein                                                               |     |
| CIMG_07994 | 1.69  | 0.00012   | 2.39  | 3.44E-07 | conserved hypothetical protein                                                      |     |
| CIMG_08011 | 2.27  | 3.36E-08  | 8.79  | 4.02E-31 | conserved hypothetical protein                                                      |     |
| CIMG_08012 | 1.86  | 0.00001   | 1.90  | 0.00016  | protein kinase                                                                      |     |
| CIMG_08030 | 10.98 | 2.71E-57  | 11.80 | 9.80E-45 | amine oxidase                                                                       | *   |
| CIMG_08031 | 1.76  | 0.00011   | 1.91  | 0.00101  | conserved hypothetical protein                                                      |     |
| CIMG_08039 | 4.73  | 1.07E-34  | 5.80  | 5.69E-18 | integral membrane protein (SUR7 protein)                                            | *   |
| CIMG_08043 | 1.58  | 0.00082   | 1.69  | 0.00032  | DNA excision repair protein Rad2                                                    |     |
| CIMG_08045 | 2.18  | 5.73E-10  | 1.95  | 0.00017  | chromosome segregation protein Spc105                                               |     |
| CIMG_08062 | 1.93  | 1.94E-06  | 3.72  | 1.99E-11 | png1                                                                                |     |
| CIMG_08067 | 4.76  | 3.10E-37  | 2.77  | 1.01E-09 | G1/S-specific cyclin Cln1                                                           |     |
| CIMG_08071 | 3.21  | 6.86E-12  | 3.07  | 2.37E-08 | TAM domain methyltransferase                                                        |     |
| CIMG_08075 | 2.67  | 1.08E-15  | 1.82  | 0.00309  | FK506-binding protein                                                               | *   |
| CIMG_08076 | 2.85  | 7.48E-13  | 2.12  | 2.90E-06 | conserved hypothetical protein (Cytochrome b5-like Heme/Steroid binding domain)     |     |
| CIMG_08090 | 2.04  | 1.10E-07  | 1.57  | 0.01701  | SSOII                                                                               |     |
| CIMG_08092 | 2.28  | 3.07E-10  | 1.74  | 0.00244  | eukaryotic translation initiation factor 4E-1                                       |     |
| CIMG_08102 | 1.50  | 0.00179   | 1.54  | 0.00544  | isoleucyl-tRNA synthetase                                                           |     |
| CIMG_08109 | 4.17  | 1.07E-14  | 1.85  | 0.00007  | GPI mannosyltransferase 1                                                           | *   |
| CIMG_08113 | 2.76  | 2.29E-12  | 2.81  | 5.52E-08 | conserved hypothetical protein                                                      |     |
| CIMG_08115 | 2.58  | 4.98E-14  | 2.17  | 0.00015  | squalene synthetase                                                                 |     |
| CIMG_08120 | 1.45  | 0.02212   | 1.38  | 0.04837  | DNA damage response protein RcaA                                                    |     |
| CIMG_08129 | 5.23  | 1.13E-39  | 1.82  | 0.00346  | conserved hypothetical protein                                                      |     |
| CIMG_08160 | 1.89  | 3.54E-06  | 2.96  | 1.22E-08 | metallopeptidase MepB                                                               |     |
| CIMG_08162 | 3.31  | 2.38E-21  | 3.10  | 3.46E-09 | calmodulin-beta                                                                     |     |
| CIMG_08164 | 2.56  | 7.35E-07  | 2.27  | 0.00021  | conserved hypothetical protein                                                      |     |
| CIMG_08173 | 2.21  | 2.14E-08  | 2.08  | 3.50E-06 | conserved hypothetical protein (Arv1-like family)                                   |     |
| CIMG_08176 | 3.82  | 1.70E-15  | 2.20  | 0.00031  | conserved hypothetical protein                                                      |     |
| CIMG_08179 | 1.87  | 0.00006   | 2.20  | 0.00114  | conserved hypothetical protein                                                      |     |
| CIMG_08182 | 1.43  | 0.00701   | 1.81  | 0.00133  | proteasome component PUP2                                                           |     |
| CIMG_08190 | 1.49  | 0.01855   | 6.34  | 1.03E-16 | galactose-1-phosphate uridylyltransferase                                           |     |
| CIMG_08192 | 2.22  | 2.62E-09  | 2.62  | 3.20E-07 | conserved hypothetical protein (fungal Zn(2)-Cys(6) binuclear cluster domain)       |     |

\*: Predicted secreted;

+: Gene under positive selection [19]; G: Gene gained in Coccidioides [19]

H, S: Up-regulated in Hyphae or Spherule by microarray [18]

**Table S1: All genes up-regulated in saprobic phase**

|            |        |           |       |          |                                                                                      |     |
|------------|--------|-----------|-------|----------|--------------------------------------------------------------------------------------|-----|
| CIMG_08198 | 1.51   | 0.00222   | 2.56  | 1.75E-06 | ML domain-containing protein                                                         | *   |
| CIMG_08199 | 2.03   | 4.99E-08  | 2.95  | 3.17E-10 | vacuolar ATP synthase subunit F                                                      |     |
| CIMG_08207 | 2.59   | 5.44E-10  | 2.50  | 8.62E-06 | nuclear pore protein                                                                 |     |
| CIMG_08215 | 1.33   | 0.04319   | 2.83  | 5.96E-06 | conserved hypothetical protein (C2H2 type zinc finger)                               |     |
| CIMG_08216 | 1.56   | 0.00120   | 1.96  | 0.00006  | ATP binding L-PSP endoribonuclease                                                   |     |
| CIMG_08220 | 1.36   | 0.02247   | 2.54  | 9.56E-08 | serine/threonine protein kinase                                                      |     |
| CIMG_08288 | 1.33   | 0.04315   | 1.96  | 0.00115  | aminopeptidase                                                                       |     |
| CIMG_08301 | 3.77   | 1.35E-19  | 2.64  | 9.31E-08 | conserved hypothetical protein                                                       |     |
| CIMG_08309 | 3.01   | 3.36E-19  | 1.67  | 0.00460  | DUF757 domain-containing protein                                                     |     |
| CIMG_08312 | 2.07   | 0.00001   | 5.27  | 1.81E-14 | ABC a-pheromone efflux pump AtrD                                                     |     |
| CIMG_08326 | 3.88   | 1.07E-23  | 4.55  | 2.88E-18 | conserved hypothetical protein                                                       |     |
| CIMG_08338 | 1.39   | 0.02746   | 1.89  | 0.00067  | conserved hypothetical protein                                                       | G * |
| CIMG_08341 | 9.96   | 3.29E-49  | 13.05 | 4.70E-45 | conserved hypothetical protein (Basic region leucine zipper)                         |     |
| CIMG_08444 | 1.42   | 0.02201   | 2.26  | 0.00010  | sterol 24-C-methyltransferase                                                        |     |
| CIMG_08452 | 1.44   | 0.00957   | 2.03  | 0.00064  | glycine dehydrogenase                                                                |     |
| CIMG_08453 | 2.43   | 2.85E-12  | 3.62  | 1.53E-14 | aromatic-L-amino acid decarboxylase                                                  |     |
| CIMG_08455 | 1.51   | 0.01090   | 3.91  | 3.91E-13 | bZIP transcription factor HacA                                                       | +   |
| CIMG_08465 | 1.36   | 0.03194   | 2.89  | 8.84E-15 | acid trehalase                                                                       | *   |
| CIMG_08473 | 5.79   | 1.06E-11  | 4.12  | 8.66E-06 | DUF1881 domain-containing protein                                                    |     |
| CIMG_08485 | 1.84   | 0.00211   | 10.05 | 1.52E-38 | UMTA (methyltransferase)                                                             |     |
| CIMG_08488 | 1.92   | 1.32E-06  | 2.17  | 3.54E-07 | lipase/serine esterase                                                               |     |
| CIMG_08497 | 2.31   | 8.09E-10  | 11.89 | 1.30E-31 | conserved hypothetical protein                                                       |     |
| CIMG_08498 | 6.61   | 1.63E-47  | 11.41 | 8.41E-41 | conserved hypothetical protein (putative heterokaryon incompatibility protein – HET) |     |
| CIMG_08499 | 14.68  | 5.01E-10  | 12.04 | 8.75E-11 | hypothetical protein                                                                 |     |
| CIMG_08500 | 3.15   | 4.66E-12  | 1.83  | 0.00154  | conserved hypothetical protein                                                       |     |
| CIMG_08510 | 1.61   | 0.00017   | 2.40  | 3.42E-08 | AAA family ATPase                                                                    |     |
| CIMG_08517 | 6.04   | 1.25E-49  | 2.42  | 8.00E-06 | conserved hypothetical protein                                                       |     |
| CIMG_08519 | 1.54   | 0.00087   | 1.81  | 0.00041  | nuclear pore protein (Nup93/Nic96)                                                   |     |
| CIMG_08522 | 4.26   | 6.76E-28  | 2.58  | 3.76E-06 | protein tyrosine phosphatase                                                         | +   |
| CIMG_08525 | 1.63   | 0.00027   | 1.37  | 0.02331  | conserved hypothetical protein                                                       | *   |
| CIMG_08528 | 1.95   | 8.27E-08  | 2.27  | 4.19E-08 | calcium permease family membrane transporter                                         |     |
| CIMG_08532 | 2.07   | 1.42E-06  | 1.80  | 0.00257  | ubiquitin fusion degradation protein                                                 |     |
| CIMG_08541 | 2.60   | 6.98E-08  | 1.82  | 0.00030  | conserved hypothetical protein (putative FAD dependent oxidoreductase)               |     |
| CIMG_08542 | 3.48   | 2.38E-12  | 5.12  | 4.54E-14 | MFS multidrug transporter                                                            |     |
| CIMG_08552 | 5.91   | 7.50E-21  | 1.96  | 0.00138  | conserved hypothetical protein                                                       |     |
| CIMG_08622 | 1.71   | 0.00030   | 1.87  | 0.00004  | conserved hypothetical protein                                                       |     |
| CIMG_08629 | 2.96   | 2.99E-19  | 5.50  | 1.21E-20 | conserved hypothetical protein (phenazine biosynthesis protein PhzF family)          |     |
| CIMG_08630 | 11.20  | 6.82E-48  | 5.62  | 9.93E-21 | conserved hypothetical protein                                                       |     |
| CIMG_08646 | 3.14   | 2.17E-15  | 2.52  | 1.47E-06 | thymidylate synthase                                                                 |     |
| CIMG_08649 | 1.68   | 0.00004   | 3.30  | 9.79E-14 | histone deacetylase HosB                                                             |     |
| CIMG_08650 | 1.68   | 0.00587   | 12.91 | 1.15E-35 | leucine aminopeptidase 2                                                             | *   |
| CIMG_08655 | 1.68   | 0.00008   | 5.69  | 2.79E-22 | chitin synthase 2                                                                    |     |
| CIMG_08656 | 2.18   | 1.55E-10  | 3.31  | 6.20E-14 | mitochondrial ATPase                                                                 |     |
| CIMG_08657 | 1.82   | 1.96E-06  | 2.64  | 5.08E-08 | protein kinase activator Bem1                                                        |     |
| CIMG_08659 | 1.64   | 0.00038   | 1.81  | 0.00041  | conserved hypothetical protein                                                       |     |
| CIMG_08665 | 9.90   | 7.39E-69  | 7.72  | 4.42E-21 | conserved hypothetical protein                                                       | *   |
| CIMG_08666 | 6.66   | 7.78E-52  | 6.51  | 1.61E-16 | hypothetical protein (putative FKBP-type peptidyl-prolyl cis-trans isomerase)        |     |
| CIMG_08670 | 1.61   | 0.00029   | 1.67  | 0.00509  | conserved hypothetical protein (hosphotransferase enzyme family)                     |     |
| CIMG_08697 | 1.51   | 0.01300   | 1.41  | 0.01418  | DEAD/DEAH box helicase                                                               |     |
| CIMG_08714 | 2.35   | 1.19E-11  | 1.71  | 0.00071  | COP9 signalosome subunit CsnD                                                        |     |
| CIMG_08725 | 2.76   | 2.06E-16  | 1.43  | 0.04261  | conserved hypothetical protein (alpha/beta hydrolase fold)                           |     |
| CIMG_08761 | 1.62   | 0.01600   | 4.46  | 2.95E-16 | conserved hypothetical protein (hosphotransferase enzyme family)                     |     |
| CIMG_08762 | 1.64   | 0.00034   | 3.06  | 1.57E-07 | conserved hypothetical protein                                                       |     |
| CIMG_08769 | 1.88   | 1.55E-06  | 1.88  | 0.00063  | chitin synthase activator                                                            | +   |
| CIMG_08817 | 1.57   | 0.00537   | 1.73  | 0.00625  | GNAT family acetyltransferase Nat4                                                   |     |
| CIMG_08818 | 1.53   | 0.02094   | 1.54  | 0.01184  | GPI transamidase component PIG-U                                                     | G * |
| CIMG_08827 | 2.35   | 0.00042   | 2.95  | 3.44E-06 | conserved hypothetical protein                                                       |     |
| CIMG_08829 | 1.66   | 0.00016   | 1.46  | 0.01327  | glutaminy cyclase                                                                    | *   |
| CIMG_08833 | 13.45  | 1.32E-95  | 12.88 | 8.36E-37 | ABC bile acid transporter                                                            |     |
| CIMG_08842 | 2.47   | 0.00184   | 4.64  | 3.57E-11 | conserved hypothetical protein                                                       |     |
| CIMG_08845 | 1.76   | 0.01858   | 18.28 | 1.45E-48 | conserved hypothetical protein                                                       |     |
| CIMG_08860 | 1.68   | 0.00005   | 1.81  | 0.00059  | regulatory protein Ral2                                                              |     |
| CIMG_08862 | 1.53   | 0.00396   | 2.33  | 4.92E-07 | aldo/keto reductase                                                                  |     |
| CIMG_08863 | 1.40   | 0.03323   | 2.35  | 5.27E-08 | conserved hypothetical protein (WD domain)                                           |     |
| CIMG_08881 | 2.37   | 1.75E-08  | 1.35  | 0.01921  | RNA polymerase II mediator complex component SRB4                                    |     |
| CIMG_08892 | 1.59   | 0.00071   | 1.61  | 0.01042  | bZIP transcription factor                                                            | +   |
| CIMG_08916 | 2.23   | 7.19E-10  | 1.63  | 0.00233  | conserved hypothetical protein                                                       |     |
| CIMG_08922 | 140.97 | 2.90E-210 | 1.33  | 0.01456  | GABA permease                                                                        |     |
| CIMG_08970 | 3.45   | 2.06E-20  | 2.37  | 5.14E-06 | S-adenosylmethionine synthetase                                                      |     |

\*: Predicted secreted;

+: Gene under positive selection [19]; G: Gene gained in Coccidioides [19]

H, S: Up-regulated in Hyphae or Spherule by microarray [18]

**Table S1: All genes up-regulated in saprobic phase**

|            |       |           |       |          |                                                                                      |   |
|------------|-------|-----------|-------|----------|--------------------------------------------------------------------------------------|---|
| CIMG_08972 | 3.19  | 1.17E-18  | 2.53  | 4.87E-07 | conserved hypothetical protein                                                       |   |
| CIMG_08973 | 3.52  | 3.98E-25  | 1.92  | 0.00071  | FRE family ferric-chelate reductase                                                  | * |
| CIMG_08975 | 1.38  | 0.02496   | 3.41  | 1.51E-11 | conserved hypothetical protein                                                       |   |
| CIMG_08981 | 3.83  | 5.77E-16  | 2.36  | 0.00002  | origin recognition complex subunit Orc1                                              |   |
| CIMG_08996 | 3.46  | 5.35E-24  | 1.90  | 0.00076  | conserved hypothetical protein                                                       |   |
| CIMG_08998 | 20.51 | 1.55E-74  | 1.68  | 0.03269  | conserved hypothetical protein                                                       |   |
| CIMG_09006 | 4.55  | 6.32E-19  | 1.65  | 0.00432  | translation initiation factor eIF4E                                                  |   |
| CIMG_09007 | 2.20  | 2.90E-09  | 1.51  | 0.00845  | conserved hypothetical protein                                                       |   |
| CIMG_09010 | 1.50  | 0.00460   | 2.54  | 4.61E-07 | cation efflux family protein                                                         |   |
| CIMG_09011 | 1.40  | 0.01408   | 1.93  | 0.00007  | RING finger ubiquitin ligase                                                         | * |
| CIMG_09023 | 2.37  | 1.21E-11  | 2.90  | 4.30E-07 | nuclear and cytoplasmic polyadenylated RNA-binding protein pub1                      |   |
| CIMG_09033 | 3.64  | 2.64E-25  | 4.89  | 1.09E-22 | acetyltransferase                                                                    | H |
| CIMG_09034 | 1.86  | 0.00008   | 3.86  | 2.10E-14 | conserved hypothetical protein                                                       |   |
| CIMG_09037 | 3.09  | 0.00157   | 2.85  | 0.00258  | conserved hypothetical protein                                                       |   |
| CIMG_09050 | 1.69  | 0.00703   | 3.92  | 0.00512  | conserved hypothetical protein (CVNH domain)                                         | * |
| CIMG_09055 | 1.93  | 4.23E-07  | 4.21  | 2.73E-17 | PQ loop repeat protein                                                               |   |
| CIMG_09063 | 5.53  | 1.20E-40  | 2.39  | 4.97E-07 | conserved hypothetical protein (Phospholipase/Carboxylesterase)                      |   |
| CIMG_09071 | 1.48  | 0.02413   | 9.66  | 7.39E-23 | homeobox domain-containing protein                                                   |   |
| CIMG_09088 | 1.54  | 0.02062   | 1.93  | 4.57E-07 | CND11p                                                                               |   |
| CIMG_09089 | 1.91  | 0.00026   | 5.05  | 1.19E-22 | geranylgeranyl pyrophosphate synthase                                                |   |
| CIMG_09113 | 2.10  | 5.76E-09  | 1.56  | 0.03328  | Endoplasmic reticulum vesicle protein ERV25                                          | * |
| CIMG_09118 | 1.88  | 0.00001   | 2.84  | 1.18E-11 | conserved hypothetical protein                                                       |   |
| CIMG_09123 | 2.18  | 4.34E-10  | 2.57  | 2.48E-07 | MFS transporter                                                                      |   |
| CIMG_09141 | 2.20  | 3.27E-10  | 2.16  | 8.15E-06 | Ser/Thr protein phosphatase                                                          |   |
| CIMG_09142 | 1.96  | 8.27E-08  | 1.66  | 0.00217  | rho-gdp dissociation inhibitor                                                       |   |
| CIMG_09167 | 3.09  | 2.18E-14  | 2.80  | 1.15E-07 | secretory pathway protein Ssp120                                                     | * |
| CIMG_09170 | 1.77  | 0.00002   | 2.28  | 1.98E-07 | protein-vacuolar targeting protein Atg18                                             |   |
| CIMG_09183 | 4.01  | 1.01E-30  | 4.37  | 3.98E-17 | dynein heavy chain                                                                   |   |
| CIMG_09185 | 2.19  | 3.96E-08  | 3.79  | 2.25E-16 | acetyltransferase                                                                    |   |
| CIMG_09196 | 3.10  | 9.13E-16  | 2.11  | 2.89E-06 | rho guanyl-nucleotide exchange factor                                                |   |
| CIMG_09200 | 1.71  | 0.00004   | 1.48  | 0.03894  | pre-mRNA splicing factor syf-1                                                       |   |
| CIMG_09215 | 3.49  | 4.34E-16  | 2.58  | 1.54E-08 | ubiquitin C-terminal hydrolase                                                       |   |
| CIMG_09222 | 1.95  | 5.25E-07  | 1.56  | 0.00499  | integral membrane protein                                                            |   |
| CIMG_09273 | 3.12  | 2.30E-18  | 1.99  | 0.00002  | kinesin family protein                                                               |   |
| CIMG_09291 | 3.07  | 3.00E-19  | 5.12  | 2.45E-17 | cell wall glucanase                                                                  | * |
| CIMG_09301 | 7.33  | 7.73E-58  | 2.37  | 4.37E-07 | conserved hypothetical protein                                                       |   |
| CIMG_09304 | 64.11 | 3.15E-150 | 21.11 | 1.58E-34 | wall-associated proteinase                                                           |   |
| CIMG_09306 | 3.35  | 5.51E-22  | 6.67  | 3.82E-32 | conserved hypothetical protein                                                       |   |
| CIMG_09318 | 4.32  | 2.88E-21  | 2.17  | 0.00001  | DNA repair protein rad5                                                              |   |
| CIMG_09326 | 2.48  | 3.08E-11  | 1.69  | 0.00046  | decapping enzyme Dcp2                                                                |   |
| CIMG_09328 | 3.22  | 4.53E-21  | 5.88  | 4.58E-28 | conserved hypothetical protein                                                       |   |
| CIMG_09348 | 2.08  | 0.00098   | 1.93  | 0.00002  | conserved hypothetical protein                                                       |   |
| CIMG_09360 | 1.45  | 0.02033   | 1.89  | 0.00017  | conserved hypothetical protein                                                       |   |
| CIMG_09364 | 3.45  | 6.64E-07  | 4.05  | 1.57E-08 | MFS sugar transporter                                                                | * |
| CIMG_09377 | 2.25  | 7.59E-11  | 2.68  | 6.90E-08 | C6 transcription factor                                                              |   |
| CIMG_09378 | 2.34  | 3.38E-06  | 3.01  | 5.46E-09 | conserved hypothetical protein (putative O-methyltransferase)                        |   |
| CIMG_09395 | 2.58  | 8.12E-12  | 1.63  | 0.00485  | conserved hypothetical protein                                                       |   |
| CIMG_09396 | 2.03  | 5.16E-08  | 2.00  | 0.00004  | C2H2 transcription factor                                                            |   |
| CIMG_09401 | 2.07  | 9.22E-09  | 1.97  | 0.00026  | Na(+)/H(+) antiporter                                                                |   |
| CIMG_09402 | 3.36  | 1.99E-22  | 2.26  | 6.50E-06 | integral membrane protein (Mpv17 / PMP22 family)                                     |   |
| CIMG_09425 | 2.53  | 5.74E-11  | 1.75  | 0.00047  | CAF1 family ribonuclease                                                             |   |
| CIMG_09427 | 7.57  | 1.48E-39  | 2.61  | 1.39E-07 | peroxin 26                                                                           |   |
| CIMG_09438 | 1.32  | 0.03049   | 1.64  | 0.00147  | bimD protein                                                                         |   |
| CIMG_09443 | 1.54  | 0.00092   | 1.86  | 0.00006  | SWI-SNF complex subunit                                                              |   |
| CIMG_09448 | 2.07  | 2.14E-07  | 1.89  | 0.00208  | peroxisome biosynthesis protein                                                      |   |
| CIMG_09452 | 1.64  | 0.00029   | 1.50  | 0.01193  | Conserved hypothetical protein (DUF1237)                                             | * |
| CIMG_09465 | 2.34  | 6.30E-06  | 2.53  | 3.13E-06 | conserved hypothetical protein                                                       |   |
| CIMG_09482 | 1.49  | 0.00456   | 1.81  | 0.01747  | phospholipase D active site-containing protein                                       |   |
| CIMG_09488 | 2.88  | 8.83E-17  | 4.40  | 1.98E-19 | glutathione S-transferase                                                            |   |
| CIMG_09490 | 1.98  | 4.19E-07  | 2.19  | 6.40E-07 | palmitoyltransferase pfa3                                                            |   |
| CIMG_09512 | 2.93  | 8.05E-19  | 4.72  | 2.52E-17 | uracil phosphoribosyltransferase                                                     |   |
| CIMG_09513 | 3.01  | 2.21E-17  | 2.34  | 3.83E-06 | C2H2 zinc finger domain-containing protein                                           |   |
| CIMG_09533 | 2.45  | 1.71E-12  | 2.47  | 5.32E-07 | conserved hypothetical protein (putative sensor histidine kinase/response regulator) |   |
| CIMG_09555 | 5.72  | 2.63E-47  | 5.07  | 2.26E-22 | zinc metalloprotease                                                                 |   |
| CIMG_09560 | 13.94 | 2.49E-96  | 1.74  | 0.03896  | proline rich antigen 2                                                               | * |
| CIMG_09564 | 4.75  | 1.55E-34  | 7.69  | 1.12E-29 | conserved hypothetical protein                                                       |   |
| CIMG_09565 | 4.28  | 3.39E-26  | 4.63  | 2.38E-13 | conserved hypothetical protein                                                       |   |
| CIMG_09566 | 3.24  | 3.53E-21  | 2.60  | 7.45E-06 | ornithine decarboxylase                                                              |   |
| CIMG_09567 | 5.84  | 1.13E-47  | 14.28 | 2.94E-40 | conserved hypothetical protein                                                       |   |

\*: Predicted secreted;

+: Gene under positive selection [19]; G: Gene gained in Coccidioides [19]

H, S: Up-regulated in Hyphae or Spherule by microarray [18]



**Table S1: All genes up-regulated in saprobic phase**

|            |       |           |       |          |                                                                                            |     |
|------------|-------|-----------|-------|----------|--------------------------------------------------------------------------------------------|-----|
| CIMG_09578 | 2.86  | 5.48E-13  | 7.88  | 1.42E-26 | phospholipase D                                                                            | *   |
| CIMG_09589 | 2.08  | 3.38E-09  | 1.58  | 0.00073  | cation chloride cotransporter                                                              |     |
| CIMG_09617 | 3.08  | 1.83E-11  | 7.92  | 1.80E-18 | RNA exonuclease Rex3                                                                       |     |
| CIMG_09624 | 1.61  | 0.00113   | 2.59  | 5.96E-08 | conserved hypothetical protein (putative ATPase)                                           |     |
| CIMG_09625 | 2.82  | 4.22E-14  | 3.22  | 6.17E-11 | conserved hypothetical protein (Transcription factor Pcc1)                                 |     |
| CIMG_09628 | 5.19  | 1.40E-39  | 4.01  | 1.35E-17 | protein-tyrosine phosphatase                                                               |     |
| CIMG_09634 | 2.10  | 3.61E-06  | 2.27  | 0.00014  | homeobox transcription factor                                                              |     |
| CIMG_09636 | 1.86  | 2.97E-06  | 3.08  | 1.53E-10 | conserved hypothetical protein                                                             |     |
| CIMG_09663 | 1.61  | 0.00037   | 2.03  | 0.00006  | serine/threonine protein phosphatase PP2A catalytic subunit                                |     |
| CIMG_09664 | 4.49  | 2.41E-33  | 5.52  | 1.63E-17 | conserved hypothetical protein                                                             |     |
| CIMG_09666 | 1.67  | 0.00007   | 1.60  | 0.00708  | HAD superfamily hydrolase                                                                  |     |
| CIMG_09676 | 3.23  | 1.45E-17  | 1.65  | 0.01188  | conserved hypothetical protein (twin-arginine translocation (Tat) pathway signal sequence) |     |
| CIMG_09701 | 1.90  | 2.97E-06  | 3.21  | 8.54E-13 | DNA polymerase delta subunit 4                                                             |     |
| CIMG_09713 | 1.57  | 0.00122   | 1.61  | 0.00930  | zinc finger protein ZPR1                                                                   |     |
| CIMG_09740 | 1.49  | 0.01695   | 17.07 | 3.28E-51 | conserved hypothetical protein                                                             |     |
| CIMG_09756 | 1.31  | 0.04137   | 1.48  | 0.03540  | conserved hypothetical protein                                                             |     |
| CIMG_09759 | 1.91  | 1.41E-06  | 3.12  | 9.12E-12 | conserved hypothetical protein                                                             |     |
| CIMG_09760 | 1.45  | 0.01343   | 1.92  | 0.00141  | DUF1275 domain-containing protein                                                          |     |
| CIMG_09762 | 3.39  | 2.69E-13  | 1.97  | 0.00041  | acyl-CoA dehydrogenase                                                                     |     |
| CIMG_09773 | 2.97  | 8.21E-09  | 9.41  | 8.50E-19 | fungal chitosanase                                                                         | *   |
| CIMG_09781 | 8.56  | 3.29E-68  | 15.25 | 3.89E-45 | hypothetical protein                                                                       |     |
| CIMG_09786 | 2.20  | 2.49E-09  | 2.39  | 5.93E-07 | RNA binding domain-containing protein                                                      |     |
| CIMG_09790 | 1.56  | 0.00080   | 1.54  | 0.00690  | conserved hypothetical protein (Zinc finger)                                               |     |
| CIMG_09802 | 1.44  | 0.00633   | 1.99  | 0.00001  | F-box and WD domain-containing protein                                                     |     |
| CIMG_09805 | 20.47 | 2.65E-61  | 9.04  | 1.93E-17 | aldehyde dehydrogenase                                                                     |     |
| CIMG_09811 | 2.62  | 2.23E-13  | 3.14  | 8.86E-12 | proline utilization protein PrnX                                                           |     |
| CIMG_09812 | 2.42  | 0.00008   | 8.65  | 3.45E-15 | conserved hypothetical protein                                                             |     |
| CIMG_09817 | 5.22  | 5.51E-31  | 1.88  | 0.02434  | high affinity copper transporter                                                           |     |
| CIMG_09823 | 3.66  | 8.11E-14  | 6.16  | 6.83E-23 | benzoate 4-monooxygenase cytochrome P450                                                   | *   |
| CIMG_09824 | 52.37 | 1.70E-163 | 97.31 | 6.33E-67 | conserved hypothetical protein (PAN domain)                                                | *   |
| CIMG_09826 | 10.80 | 4.92E-63  | 11.80 | 9.26E-38 | conserved hypothetical protein                                                             |     |
| CIMG_09828 | 3.71  | 1.19E-26  | 8.07  | 2.82E-31 | conserved hypothetical protein (PAN domain)                                                | G * |
| CIMG_09911 | 4.92  | 1.05E-39  | 5.54  | 3.32E-17 | amino-acid permease inda1                                                                  |     |
| CIMG_09916 | 1.50  | 0.00274   | 1.23  | 0.03348  | protein kinase and ribonuclease Ire1                                                       | *   |
| CIMG_09961 | 1.50  | 0.00172   | 3.69  | 3.09E-12 | C6 finger domain-containing protein                                                        |     |
| CIMG_09962 | 2.66  | 8.89E-15  | 3.10  | 5.98E-12 | VelB                                                                                       |     |
| CIMG_09977 | 1.43  | 0.01277   | 1.99  | 0.00030  | conserved hypothetical protein                                                             |     |
| CIMG_09984 | 2.79  | 7.76E-17  | 2.31  | 0.00003  | glycerol-3-phosphate dehydrogenase                                                         |     |
| CIMG_09985 | 1.63  | 0.00020   | 1.62  | 0.01754  | riboflavin aldehyde-forming enzyme                                                         |     |
| CIMG_10016 | 2.50  | 1.58E-12  | 2.35  | 3.08E-07 | dynamin GTPase                                                                             |     |
| CIMG_10029 | 1.87  | 9.58E-07  | 2.60  | 1.03E-07 | glucose N-acetyltransferase 1                                                              | *   |
| CIMG_10038 | 3.17  | 5.11E-21  | 1.80  | 0.00333  | metalloreductase                                                                           |     |
| CIMG_10049 | 4.04  | 7.43E-23  | 1.87  | 0.00342  | C2H2 finger domain-containing protein                                                      |     |
| CIMG_10051 | 2.86  | 1.47E-11  | 2.82  | 1.48E-07 | G2-specific protein kinase nimA                                                            |     |
| CIMG_10073 | 1.56  | 0.00065   | 1.73  | 0.00300  | conserved hypothetical protein                                                             |     |
| CIMG_10075 | 2.81  | 1.57E-12  | 2.03  | 5.81E-06 | glutamine synthetase                                                                       |     |
| CIMG_10096 | 1.94  | 0.00014   | 2.21  | 0.00004  | choline transporter                                                                        |     |
| CIMG_10105 | 1.61  | 0.00715   | 7.17  | 3.04E-19 | glycerol kinase                                                                            | *   |
| CIMG_10129 | 5.04  | 1.16E-27  | 2.08  | 0.00002  | oligopeptide transporter                                                                   |     |
| CIMG_10157 | 3.21  | 1.95E-06  | 18.61 | 1.13E-58 | conserved hypothetical protein (RNA exonuclease 3)                                         |     |
| CIMG_10165 | 1.77  | 0.00046   | 2.62  | 6.52E-06 | aflatoxin efflux pump protein                                                              |     |
| CIMG_10171 | 1.42  | 0.00780   | 1.37  | 0.04825  | phospholipid-translocating P-type ATPase                                                   | S   |
| CIMG_10179 | 1.54  | 0.00190   | 1.93  | 0.00023  | malate/L-lactate dehydrogenase                                                             |     |
| CIMG_10191 | 7.69  | 3.48E-57  | 8.78  | 2.65E-42 | extracellular elastolytic metalloproteinase                                                | *   |
| CIMG_10207 | 1.35  | 0.04611   | 1.63  | 0.00502  | cell division cycle protein 123                                                            |     |
| CIMG_10212 | 2.33  | 6.52E-08  | 2.22  | 4.41E-07 | hypothetical protein (RF-1 domain)                                                         |     |
| CIMG_10213 | 1.79  | 5.15E-06  | 2.17  | 0.00003  | chromosome segregation protein Cse1                                                        |     |
| CIMG_10217 | 11.92 | 1.45E-82  | 24.19 | 3.14E-64 | conserved hypothetical protein                                                             |     |
| CIMG_10229 | 1.93  | 0.03640   | 3.28  | 0.00001  | conserved hypothetical protein                                                             |     |
| CIMG_10251 | 3.06  | 2.58E-19  | 1.71  | 0.00283  | mitochondrial 2-oxodicarboxylate carrier protein                                           |     |
| CIMG_10254 | 1.62  | 0.00060   | 1.29  | 0.04068  | HLH transcription factor                                                                   |     |
| CIMG_10258 | 2.13  | 4.74E-08  | 2.83  | 8.72E-11 | putative golgi traffic protein SFT2                                                        |     |
| CIMG_10262 | 4.74  | 1.34E-23  | 7.92  | 4.03E-26 | PAP2 domain-containing protein                                                             |     |
| CIMG_10263 | 3.62  | 2.42E-09  | 3.21  | 1.84E-06 | conserved hypothetical protein (AIG2-like family)                                          |     |
| CIMG_10292 | 2.17  | 2.23E-09  | 2.20  | 0.00212  | cation transport ATPase                                                                    |     |
| CIMG_10298 | 1.82  | 9.74E-06  | 4.09  | 1.58E-12 | conserved hypothetical protein (YD repeat motif)                                           |     |
| CIMG_10308 | 2.32  | 9.66E-12  | 2.09  | 0.00010  | conserved hypothetical protein                                                             |     |
| CIMG_10310 | 1.73  | 0.00004   | 1.51  | 0.00336  | pre-mRNA splicing factor                                                                   |     |
| CIMG_10311 | 2.58  | 3.90E-10  | 2.98  | 2.60E-06 | adenosylhomocysteinase                                                                     |     |

\*: Predicted secreted;

+: Gene under positive selection [19]; G: Gene gained in *Coccidioides* [19]

H, S: Up-regulated in Hyphae or Spherule by microarray [18]

**Table S1: All genes up-regulated in saprobic phase**

|            |       |           |       |          |                                                                             |     |
|------------|-------|-----------|-------|----------|-----------------------------------------------------------------------------|-----|
| CIMG_10314 | 1.82  | 1.84E-06  | 2.13  | 2.42E-06 | ATP-binding cassette sub-family E member 1                                  |     |
| CIMG_10316 | 2.28  | 2.13E-07  | 1.51  | 0.00929  | conserved hypothetical protein                                              |     |
| CIMG_10332 | 1.84  | 2.25E-06  | 2.30  | 3.07E-08 | conserved hypothetical protein                                              |     |
| CIMG_10468 | 4.98  | 1.43E-07  | 50.17 | 5.70E-18 | hypothetical protein                                                        |     |
| CIMG_10473 | 22.19 | 1.86E-50  | 8.13  | 2.23E-19 | GNAT family N-acetyltransferase                                             |     |
| CIMG_10563 | 1.44  | 0.02396   | 3.46  | 1.12E-13 | intracellular protease/amidase                                              |     |
| CIMG_10564 | 4.88  | 1.27E-15  | 4.79  | 8.00E-23 | conserved hypothetical protein                                              |     |
| CIMG_10567 | 7.25  | 2.68E-56  | 35.66 | 1.51E-42 | conserved hypothetical protein                                              | *   |
| CIMG_10574 | 15.58 | 5.15E-33  | 2.82  | 4.68E-07 | conserved hypothetical protein                                              |     |
| CIMG_10658 | 1.33  | 0.03600   | 1.31  | 0.01603  | conserved hypothetical protein                                              |     |
| CIMG_10667 | 1.32  | 0.04675   | 1.49  | 0.01916  | SUA5                                                                        |     |
| CIMG_10671 | 2.26  | 1.23E-08  | 3.48  | 3.13E-15 | conserved hypothetical protein (putative ER protein Pkr1)                   | *   |
| CIMG_10681 | 2.61  | 6.99E-06  | 7.51  | 7.67E-20 | hypothetical protein                                                        |     |
| CIMG_10707 | 1.89  | 7.88E-06  | 2.47  | 0.00004  | conserved hypothetical protein                                              |     |
| CIMG_10708 | 1.54  | 0.00122   | 1.38  | 0.04734  | hypothetical protein (Smr domain, DUF1771, CUE domain)                      |     |
| CIMG_10765 | 2.09  | 5.81E-09  | 2.03  | 0.00001  | Sit4-associated protein                                                     |     |
| CIMG_10772 | 1.79  | 0.00046   | 3.51  | 1.55E-11 | hypothetical protein                                                        | *   |
| CIMG_10814 | 2.97  | 4.72E-10  | 1.98  | 0.00098  | hypothetical protein                                                        |     |
| CIMG_10817 | 11.59 | 1.19E-07  | 2.45  | 0.03195  | hypothetical protein                                                        |     |
| CIMG_10821 | 4.91  | 1.80E-15  | 2.83  | 1.04E-06 | conserved hypothetical protein                                              |     |
| CIMG_10851 | 12.60 | 1.31E-84  | 84.79 | 4.69E-73 | conserved hypothetical protein                                              | *   |
| CIMG_10854 | 6.28  | 2.97E-08  | 4.98  | 3.53E-09 | amidase                                                                     |     |
| CIMG_10937 | 4.65  | 4.02E-10  | 18.60 | 1.34E-15 | conserved hypothetical protein                                              |     |
| CIMG_10951 | 1.71  | 0.00040   | 2.68  | 2.68E-09 | nucleoside transporter                                                      |     |
| CIMG_10952 | 2.04  | 0.00012   | 2.65  | 0.00001  | conserved hypothetical protein (metallo-beta-lactamase superfamily)         |     |
| CIMG_11124 | 2.51  | 1.23E-09  | 2.58  | 9.31E-07 | kinesin family protein                                                      |     |
| CIMG_11148 | 2.62  | 9.11E-14  | 3.35  | 2.48E-12 | TATA-box binding protein                                                    |     |
| CIMG_11158 | 5.40  | 1.50E-44  | 2.30  | 1.01E-06 | hypothetical protein (putative translation machinery-associated TMA7)       |     |
| CIMG_11171 | 1.90  | 0.00001   | 1.84  | 0.00076  | conserved hypothetical protein (MAGE family)                                |     |
| CIMG_11248 | 4.08  | 2.94E-31  | 2.19  | 0.00601  | conserved hypothetical protein                                              |     |
| CIMG_11269 | 2.71  | 0.00030   | 3.47  | 0.00009  | diphosphomevalonate decarboxylase                                           |     |
| CIMG_11271 | 9.38  | 3.53E-27  | 12.11 | 1.09E-21 | hypothetical protein                                                        |     |
| CIMG_11316 | 7.54  | 1.97E-26  | 4.89  | 7.21E-13 | secretory phospholipase A2                                                  | * H |
| CIMG_11329 | 1.65  | 0.00011   | 2.87  | 7.89E-12 | conserved hypothetical protein (putative FAD dependent oxidoreductase)      | *   |
| CIMG_11333 | 1.40  | 0.01396   | 3.37  | 1.05E-09 | hypothetical protein                                                        |     |
| CIMG_11365 | 2.63  | 1.66E-10  | 2.47  | 4.14E-06 | MFS nicotinic acid transporter Tna1                                         |     |
| CIMG_11378 | 24.96 | 3.75E-133 | 20.72 | 2.25E-51 | conserved hypothetical protein                                              |     |
| CIMG_11421 | 5.25  | 2.16E-40  | 3.22  | 1.89E-12 | Gpg1                                                                        |     |
| CIMG_11540 | 7.55  | 9.02E-39  | 7.18  | 1.12E-18 | conserved hypothetical protein                                              |     |
| CIMG_11570 | 1.97  | 1.34E-06  | 1.57  | 0.00850  | hypothetical protein ( G-beta repeat, WD domain)                            |     |
| CIMG_11575 | 6.36  | 4.30E-33  | 3.81  | 2.18E-14 | phosphotyrosine protein phosphatase                                         |     |
| CIMG_11576 | 3.39  | 1.86E-18  | 2.89  | 6.34E-11 | conserved hypothetical protein                                              |     |
| CIMG_11581 | 2.31  | 7.06E-06  | 2.00  | 0.04477  | hypothetical protein (FAD binding domain)                                   |     |
| CIMG_11656 | 1.76  | 0.00003   | 1.72  | 0.00592  | Spo12 family protein                                                        |     |
| CIMG_11666 | 3.43  | 4.47E-19  | 3.23  | 3.77E-10 | carboxypeptidase S1                                                         | *   |
| CIMG_11667 | 1.70  | 0.00009   | 3.68  | 1.77E-10 | polymerase                                                                  |     |
| CIMG_11693 | 3.35  | 6.57E-14  | 2.20  | 4.52E-06 | conserved hypothetical protein                                              |     |
| CIMG_11720 | 2.63  | 1.34E-07  | 3.11  | 0.00311  | hypothetical protein                                                        |     |
| CIMG_11736 | 1.54  | 0.00180   | 1.95  | 0.00006  | DNA repair protein Rad14                                                    |     |
| CIMG_11744 | 19.42 | 5.69E-84  | 1.49  | 0.01929  | conserved hypothetical protein (Enoyl-CoA hydratase/isomerase family)       |     |
| CIMG_11746 | 1.94  | 8.19E-06  | 1.74  | 0.00443  | zinc finger protein                                                         |     |
| CIMG_11749 | 2.20  | 8.71E-07  | 2.77  | 0.00005  | serine/threonine-protein kinase 24                                          |     |
| CIMG_11772 | 2.46  | 1.12E-06  | 2.55  | 0.00001  | hypothetical protein                                                        |     |
| CIMG_11792 | 1.56  | 0.00046   | 1.78  | 0.00027  | amino acid permease Dip5                                                    |     |
| CIMG_11826 | 2.48  | 3.13E-06  | 5.65  | 2.48E-18 | hypothetical protein                                                        |     |
| CIMG_11829 | 3.54  | 1.13E-25  | 2.84  | 2.59E-11 | myosin type II heavy chain                                                  |     |
| CIMG_11835 | 3.91  | 9.77E-22  | 11.29 | 7.45E-35 | ubiquitin C-terminal hydrolase L3                                           |     |
| CIMG_11881 | 2.35  | 2.26E-08  | 3.32  | 8.35E-09 | cross-pathway control protein A (bZIP transcription factor)                 |     |
| CIMG_11930 | 1.44  | 0.00434   | 2.21  | 3.14E-06 | proteasome component                                                        |     |
| CIMG_11934 | 13.68 | 3.86E-89  | 24.54 | 2.64E-60 | conserved hypothetical protein (DMATS type aromatic prenyltransferase)      |     |
| CIMG_11945 | 12.94 | 2.41E-93  | 4.53  | 3.95E-06 | hypothetical protein                                                        |     |
| CIMG_12056 | 2.18  | 1.80E-07  | 1.69  | 0.00462  | glucosyltransferase                                                         | *   |
| CIMG_12070 | 2.15  | 5.19E-07  | 1.73  | 0.00031  | aminotransferase                                                            |     |
| CIMG_12080 | 1.73  | 0.00037   | 3.37  | 1.49E-09 | hypothetical protein                                                        |     |
| CIMG_12094 | 28.11 | 1.26E-133 | 2.18  | 7.88E-06 | hypothetical protein                                                        |     |
| CIMG_12139 | 1.82  | 2.55E-06  | 1.91  | 0.00002  | mRNA splicing protein                                                       |     |
| CIMG_12175 | 1.60  | 0.00030   | 1.59  | 0.01824  | chromatin remodeling complex subunit (SWI/SNF and RSC complex subunit Arp9) |     |
| CIMG_12238 | 2.06  | 0.00012   | 3.84  | 4.92E-10 | conserved hypothetical protein                                              |     |
| CIMG_12261 | 12.23 | 3.99E-30  | 2.77  | 6.60E-07 | conserved hypothetical protein                                              | *   |

\*: Predicted secreted;

+: Gene under positive selection [19]; G: Gene gained in Coccidioides [19]

H, S: Up-regulated in Hyphae or Spherule by microarray [18]

**Table S1: All genes up-regulated in saprobic phase**

|            |       |          |       |          |                                                                                          |   |
|------------|-------|----------|-------|----------|------------------------------------------------------------------------------------------|---|
| CIMG_12262 | 4.48  | 1.26E-06 | 3.14  | 1.43E-08 | hypothetical protein                                                                     | * |
| CIMG_12293 | 1.66  | 0.00051  | 2.23  | 0.00002  | conserved hypothetical protein (putative multi-copper polyphenol oxidoreductase laccase) |   |
| CIMG_12306 | 3.90  | 3.61E-29 | 2.85  | 2.37E-09 | conserved hypothetical protein                                                           |   |
| CIMG_12323 | 1.80  | 7.92E-06 | 1.48  | 0.00781  | nuclear pore complex subunit Nup192                                                      |   |
| CIMG_12324 | 1.56  | 0.00061  | 1.40  | 0.00363  | ataxia telangiectasia mutated                                                            |   |
| CIMG_12338 | 1.56  | 0.00064  | 2.05  | 8.27E-06 | mitochondrial DNA helicase                                                               |   |
| CIMG_12351 | 2.17  | 2.56E-06 | 1.42  | 0.01289  | class I alpha-mannosidase                                                                | * |
| CIMG_12402 | 7.88  | 4.89E-18 | 3.10  | 1.95E-06 | conserved hypothetical protein                                                           |   |
| CIMG_12416 | 2.11  | 0.00020  | 1.44  | 0.03943  | conserved hypothetical protein (ERCC4 domain)                                            |   |
| CIMG_12417 | 2.54  | 1.85E-14 | 2.65  | 1.72E-08 | kinesin family protein                                                                   |   |
| CIMG_12429 | 2.80  | 2.86E-15 | 14.88 | 2.99E-54 | conserved hypothetical protein (Dynamin family)                                          |   |
| CIMG_12440 | 3.32  | 4.70E-23 | 3.67  | 2.96E-12 | pyridoxamine phosphate oxidase                                                           |   |
| CIMG_12504 | 1.42  | 0.01169  | 2.22  | 0.00002  | hypothetical protein (DASH complex subunit Hsk3 like)                                    |   |
| CIMG_12678 | 1.92  | 1.01E-06 | 1.62  | 0.00486  | RNase H domain-containing protein                                                        |   |
| CIMG_12682 | 6.22  | 2.02E-12 | 5.46  | 1.13E-08 | hypothetical protein                                                                     |   |
| CIMG_12754 | 1.68  | 0.00003  | 1.96  | 0.00013  | hypothetical protein (kelch motif)                                                       |   |
| CIMG_12755 | 5.26  | 1.42E-42 | 2.41  | 5.99E-07 | conserved hypothetical protein                                                           |   |
| CIMG_12768 | 6.94  | 7.87E-26 | 4.94  | 6.54E-13 | hypothetical protein                                                                     |   |
| CIMG_12777 | 3.22  | 1.45E-09 | 8.20  | 4.97E-12 | hypothetical protein                                                                     | * |
| CIMG_12815 | 11.05 | 1.93E-44 | 12.29 | 1.11E-26 | serine/threonine-protein kinase Eg2                                                      |   |
| CIMG_12857 | 1.95  | 1.32E-07 | 1.88  | 0.00037  | conserved hypothetical protein                                                           |   |
| CIMG_12859 | 1.32  | 0.04569  | 1.50  | 0.00299  | calcium-transporting ATPase 3                                                            |   |
| CIMG_12875 | 1.78  | 6.39E-06 | 3.29  | 2.31E-13 | urea transporter                                                                         |   |
| CIMG_12876 | 4.77  | 1.43E-35 | 2.60  | 0.00009  | conserved hypothetical protein                                                           |   |
| CIMG_13010 | 2.73  | 5.74E-15 | 4.19  | 6.93E-13 | serine/threonine protein kinase                                                          |   |
| CIMG_13024 | 1.37  | 0.01459  | 1.60  | 0.00629  | conserved hypothetical protein (SAC3/GANP/Nin1/mts3/eIF-3 p25 family)                    |   |
| CIMG_13039 | 1.50  | 0.00678  | 1.69  | 0.00160  | conserved hypothetical protein                                                           |   |
| CIMG_13043 | 2.12  | 8.57E-09 | 1.84  | 0.00019  | conserved hypothetical protein                                                           | * |
| CIMG_13055 | 4.81  | 1.33E-18 | 17.22 | 5.53E-31 | hypothetical protein                                                                     | * |
| CIMG_13059 | 3.84  | 9.92E-27 | 11.82 | 1.92E-47 | nitrogen metabolite repression regulator NmrA                                            |   |
| CIMG_13081 | 4.38  | 4.00E-06 | 3.37  | 0.00010  | hypothetical protein                                                                     |   |
| CIMG_13089 | 3.69  | 4.32E-26 | 3.09  | 4.16E-07 | hypothetical protein                                                                     |   |
| CIMG_13108 | 3.48  | 0.01145  | 2.72  | 0.00212  | conserved hypothetical protein                                                           |   |
| CIMG_13109 | 7.57  | 8.48E-36 | 2.41  | 0.00147  | ThiJ/PfpI family protein                                                                 |   |
| CIMG_13117 | 2.48  | 0.00108  | 2.03  | 0.01041  | hypothetical protein                                                                     |   |
| CIMG_13165 | 3.18  | 4.29E-12 | 7.37  | 6.20E-22 | serine/threonine protein kinase                                                          |   |
| CIMG_13166 | 2.14  | 0.00384  | 2.98  | 0.00061  | conserved hypothetical protein                                                           |   |
| CIMG_13167 | 6.81  | 6.01E-51 | 3.62  | 4.17E-10 | beta-glucosidase 5                                                                       |   |
| CIMG_13253 | 1.50  | 0.02582  | 3.08  | 3.89E-08 | hypothetical protein                                                                     |   |
| CIMG_13268 | 2.54  | 2.72E-14 | 2.66  | 5.62E-09 | hypothetical protein (Kinesin motor domain)                                              |   |
| CIMG_13285 | 2.89  | 1.99E-06 | 8.48  | 4.52E-25 | hypothetical protein                                                                     |   |
| CIMG_13368 | 2.01  | 1.95E-07 | 4.16  | 1.06E-14 | hypothetical protein                                                                     |   |
| CIMG_13374 | 13.79 | 9.41E-82 | 49.09 | 1.11E-81 | hypothetical protein                                                                     |   |
| CIMG_13400 | 3.26  | 6.42E-13 | 2.74  | 4.87E-07 | calmodulin-binding protein Sha1                                                          |   |
| CIMG_13415 | 2.74  | 5.03E-13 | 6.04  | 9.06E-13 | hypothetical protein                                                                     |   |
| CIMG_13481 | 2.82  | 1.15E-15 | 2.21  | 3.40E-07 | conserved hypothetical protein (Zinc finger)                                             |   |
| CIMG_13501 | 2.53  | 5.01E-13 | 5.04  | 2.37E-19 | hypothetical protein                                                                     |   |
| CIMG_13545 | 9.99  | 2.39E-13 | 1.60  | 0.03389  | conserved hypothetical protein                                                           |   |
| CIMG_13549 | 2.96  | 0.01541  | 2.62  | 1.17E-06 | hypothetical protein                                                                     |   |
| CIMG_13558 | 3.59  | 1.84E-17 | 2.40  | 3.57E-06 | DNA replication helicase Dna2                                                            |   |
| CIMG_13567 | 1.83  | 0.00090  | 2.65  | 6.34E-10 | conserved hypothetical protein                                                           | * |
| CIMG_13583 | 1.58  | 0.00093  | 1.69  | 0.00153  | endocytosis-associated NECA1                                                             |   |
| CIMG_13585 | 1.35  | 0.03449  | 2.22  | 1.63E-06 | kinetochore protein nuf2                                                                 |   |
| CIMG_13593 | 2.54  | 1.67E-13 | 2.03  | 0.00002  | GPI-anchored cell surface glycoprotein                                                   |   |
| CIMG_13670 | 2.55  | 1.04E-13 | 1.94  | 0.00004  | dihydrouridine synthase                                                                  |   |
| CIMG_13686 | 4.72  | 5.46E-18 | 2.26  | 2.88E-07 | hypothetical protein                                                                     |   |
| CIMG_13702 | 1.84  | 0.00145  | 4.08  | 1.32E-09 | conserved hypothetical protein                                                           |   |
| CIMG_13704 | 1.88  | 0.00968  | 2.20  | 0.00032  | conserved hypothetical protein                                                           |   |
| CIMG_13710 | 3.06  | 0.00092  | 2.75  | 0.00021  | conserved hypothetical protein                                                           |   |
| CIMG_13722 | 3.81  | 7.38E-24 | 3.91  | 1.79E-14 | hypothetical protein (SH3 domain)                                                        |   |
| CIMG_13742 | 1.91  | 0.00094  | 4.07  | 2.68E-09 | hypothetical protein                                                                     |   |
| CIMG_13753 | 1.76  | 0.00017  | 8.02  | 8.02E-34 | conserved hypothetical protein (major facilitator superfamily)                           |   |
| CIMG_13762 | 1.64  | 0.00719  | 2.25  | 0.00017  | hypothetical protein                                                                     |   |

\*: Predicted secreted;

+: Gene under positive selection [19]; G: Gene gained in Coccidioides [19]

H, S: Up-regulated in Hyphae or Spherule by microarray [18]
