# Supplementary material for: Comparative Transcriptomics of the Saprobic and Parasitic Growth Phases in Coccidioides spp
Source: PubMed Central journal article supplement (PMC3401177; doi:10.1371/journal.pone.0041034), 2012-07-20
Supplement: pone.0041034.s002.pdf [file pone.0041034.s002.pdf]

**Table S2: All genes up-regulated in parasitic phase**

| BROAD ID   | <i>C. immitis</i><br>S/H | <i>C. immitis</i><br>p-value | <i>C. posadasii</i><br>S/H | <i>C. posadasii</i><br>p-value | Gene description                                                                             | Previous studies |
|------------|--------------------------|------------------------------|----------------------------|--------------------------------|----------------------------------------------------------------------------------------------|------------------|
| CIMG_00037 | 2.11                     | 6.90E-07                     | 1.80                       | 0.00228                        | conserved hypothetical protein                                                               |                  |
| CIMG_00048 | 1.65                     | 0.00160                      | 1.81                       | 0.00108                        | metaphase-anaphase transition protein                                                        |                  |
| CIMG_00063 | 1.62                     | 0.00147                      | 1.75                       | 0.00283                        | serine/threonine-protein kinase ssn3                                                         |                  |
| CIMG_00073 | 3.40                     | 1.72E-10                     | 4.52                       | 7.54E-10                       | conserved hypothetical protein                                                               |                  |
| CIMG_00082 | 3.89                     | 4.56E-09                     | 1.87                       | 0.01104                        | conserved hypothetical protein                                                               |                  |
| CIMG_00086 | 6.00                     | 1.90E-11                     | 1.84                       | 0.02498                        | conserved hypothetical protein                                                               | *                |
| CIMG_00092 | 2.44                     | 1.62E-08                     | 3.09                       | 7.77E-10                       | PH domain-containing protein                                                                 |                  |
| CIMG_00094 | 2.08                     | 0.00003                      | 1.59                       | 0.01096                        | acc synthase                                                                                 |                  |
| CIMG_00124 | 1.92                     | 0.00006                      | 1.37                       | 0.00346                        | glutathione S-transferase                                                                    |                  |
| CIMG_00131 | 2.20                     | 0.00001                      | 2.24                       | 0.00229                        | gamma-cysteine synthetase regulatory subunit                                                 |                  |
| CIMG_00134 | 1.43                     | 0.01486                      | 2.62                       | 2.38E-07                       | NADP-dependent alcohol dehydrogenase                                                         |                  |
| CIMG_00137 | 1.90                     | 0.00005                      | 1.99                       | 0.00032                        | peroxin 24                                                                                   |                  |
| CIMG_00138 | 3.84                     | 4.30E-12                     | 3.92                       | 3.77E-10                       | conserved hypothetical protein                                                               | G                |
| CIMG_00148 | 3.86                     | 2.49E-09                     | 1.73                       | 0.00029                        | conserved hypothetical protein                                                               |                  |
| CIMG_00151 | 3.02                     | 8.11E-13                     | 2.38                       | 0.00002                        | dihydrodipicolinate synthetase                                                               |                  |
| CIMG_00159 | 5.87                     | 2.90E-12                     | 4.25                       | 1.74E-06                       | conserved hypothetical protein                                                               | *                |
| CIMG_00161 | 2.28                     | 0.00001                      | 4.23                       | 2.58E-10                       | HLH transcription factor                                                                     | +                |
| CIMG_00165 | 2.59                     | 0.01466                      | 2.84                       | 0.00333                        | conserved hypothetical protein                                                               |                  |
| CIMG_00168 | 2.29                     | 0.00748                      | 3.21                       | 0.00004                        | conserved hypothetical protein                                                               |                  |
| CIMG_00180 | 1.64                     | 0.00322                      | 4.63                       | 6.73E-11                       | conserved hypothetical protein                                                               |                  |
| CIMG_00186 | 1.76                     | 0.00273                      | 1.48                       | 0.01909                        | conserved hypothetical protein                                                               |                  |
| CIMG_00190 | 1.79                     | 0.00025                      | 1.83                       | 0.00007                        | glycerophosphoryl diester phosphodiesterase                                                  |                  |
| CIMG_00194 | 3.19                     | 7.32E-07                     | 5.60                       | 1.82E-13                       | conserved hypothetical protein                                                               |                  |
| CIMG_00195 | 1.71                     | 0.00354                      | 2.91                       | 9.72E-07                       | conserved hypothetical protein                                                               | *                |
| CIMG_00205 | 2.14                     | 3.05E-06                     | 2.62                       | 3.83E-06                       | putative DNA helicase                                                                        |                  |
| CIMG_00206 | 2.04                     | 4.70E-07                     | 3.38                       | 1.32E-13                       | sensor histidine kinase/response regulator Fos-1                                             | S                |
| CIMG_00230 | 3.08                     | 1.66E-09                     | 1.75                       | 0.02449                        | conserved hypothetical protein (Fungal Zn(2)-Cys(6) binuclear cluster domain)                |                  |
| CIMG_00242 | 1.53                     | 0.00341                      | 2.38                       | 6.62E-06                       | TBC domain-containing protein                                                                |                  |
| CIMG_00252 | 1.44                     | 0.01108                      | 1.62                       | 0.04927                        | sphingosine-1-phosphate phosphohydrolase                                                     |                  |
| CIMG_00259 | 2.61                     | 9.39E-10                     | 1.88                       | 0.00017                        | DUF866 domain-containing protein                                                             |                  |
| CIMG_00270 | 1.58                     | 0.00184                      | 1.81                       | 0.00069                        | conserved hypothetical protein                                                               |                  |
| CIMG_00273 | 1.51                     | 0.00450                      | 1.60                       | 0.00427                        | DUF92 domain-containing protein                                                              | *                |
| CIMG_00277 | 5.33                     | 1.80E-12                     | 4.19                       | 1.41E-11                       | conserved hypothetical protein                                                               |                  |
| CIMG_00281 | 2.10                     | 0.00004                      | 20.82                      | 1.26E-44                       | conserved hypothetical protein                                                               |                  |
| CIMG_00287 | 1.41                     | 0.02256                      | 1.57                       | 0.01568                        | conserved hypothetical protein (Gamma interferon inducible lysosomal thiol reductase (GILT)) |                  |
| CIMG_00294 | 2.81                     | 6.69E-11                     | 4.07                       | 1.40E-14                       | calcium dependent mitochondrial carrier protein                                              |                  |
| CIMG_00295 | 3.07                     | 5.82E-13                     | 5.24                       | 2.19E-19                       | C-type cyclin                                                                                |                  |
| CIMG_00296 | 2.52                     | 3.66E-06                     | 4.46                       | 1.67E-08                       | conserved hypothetical protein                                                               |                  |
| CIMG_00299 | 2.69                     | 1.98E-11                     | 13.24                      | 1.03E-36                       | conserved hypothetical protein                                                               |                  |
| CIMG_00308 | 2.43                     | 4.58E-06                     | 2.02                       | 0.00382                        | sister chromatid cohesion protein Dcc1                                                       |                  |
| CIMG_00311 | 2.38                     | 0.00587                      | 8.62                       | 8.72E-19                       | aspartyl protease 3                                                                          | *                |
| CIMG_00325 | 1.89                     | 0.02557                      | 3.04                       | 0.01865                        | conserved hypothetical protein                                                               |                  |
| CIMG_00326 | 2.22                     | 0.00528                      | 1.69                       | 0.03956                        | conserved hypothetical protein                                                               |                  |
| CIMG_00330 | 2.02                     | 4.72E-06                     | 1.61                       | 0.02179                        | conserved hypothetical protein (Methyltransferase domain)                                    |                  |
| CIMG_00336 | 2.55                     | 0.00001                      | 1.68                       | 0.03396                        | conserved hypothetical protein                                                               |                  |
| CIMG_00341 | 5.06                     | 5.88E-13                     | 2.14                       | 0.00133                        | DEAD/DEAH box RNA helicase                                                                   |                  |
| CIMG_00342 | 1.89                     | 0.00010                      | 1.81                       | 0.00390                        | glyoxal oxidase                                                                              |                  |
| CIMG_00348 | 3.46                     | 9.81E-12                     | 6.55                       | 1.79E-20                       | endochitinase 2                                                                              | *                |
| CIMG_00351 | 5.21                     | 2.82E-15                     | 3.42                       | 2.22E-06                       | conserved hypothetical protein                                                               | *                |
| CIMG_00356 | 1.86                     | 0.00015                      | 2.97                       | 3.74E-09                       | conserved hypothetical protein (putative acetyltransferase)                                  |                  |
| CIMG_00373 | 3.81                     | 1.81E-06                     | 2.79                       | 0.00637                        | conserved hypothetical protein                                                               |                  |
| CIMG_00406 | 3.75                     | 1.12E-11                     | 1.41                       | 0.00163                        | HMG domain-containing protein                                                                |                  |
| CIMG_00407 | 3.68                     | 0.00076                      | 3.14                       | 8.11E-06                       | conserved hypothetical protein                                                               |                  |
| CIMG_00410 | 1.97                     | 0.00001                      | 2.01                       | 0.00024                        | conserved hypothetical protein (putative integral membrane protein)                          | *                |
| CIMG_00417 | 1.41                     | 0.01744                      | 1.76                       | 0.00275                        | conserved hypothetical protein                                                               |                  |
| CIMG_00426 | 2.51                     | 2.15E-07                     | 2.27                       | 0.00063                        | COX1 assembly protein                                                                        |                  |
| CIMG_00431 | 1.58                     | 0.00865                      | 1.83                       | 0.00134                        | 2-dehydropantoate 2-reductase                                                                |                  |
| CIMG_00452 | 5.74                     | 1.11E-06                     | 4.32                       | 2.72E-06                       | conserved hypothetical protein                                                               |                  |
| CIMG_00453 | 1.87                     | 0.00003                      | 1.54                       | 0.02790                        | conserved hypothetical protein                                                               |                  |
| CIMG_00455 | 2.90                     | 0.00195                      | 3.55                       | 0.00883                        | conserved hypothetical protein                                                               |                  |
| CIMG_00461 | 2.05                     | 3.44E-06                     | 2.60                       | 9.86E-09                       | deoxyribose-phosphate aldolase 1                                                             |                  |
| CIMG_00466 | 4.07                     | 1.38E-09                     | 1.94                       | 0.00278                        | conserved hypothetical protein                                                               | G                |
| CIMG_00471 | 1.65                     | 0.00041                      | 4.16                       | 8.81E-07                       | hypothetical protein                                                                         |                  |
| CIMG_00477 | 1.89                     | 0.00003                      | 2.00                       | 0.00008                        | conserved hypothetical protein                                                               |                  |
| CIMG_00478 | 5.26                     | 3.07E-10                     | 2.02                       | 0.01839                        | conserved hypothetical protein                                                               |                  |
| CIMG_00490 | 1.69                     | 0.02853                      | 4.15                       | 7.86E-08                       | conserved hypothetical protein (DUF1203)                                                     |                  |
| CIMG_00496 | 2.83                     | 2.28E-11                     | 3.20                       | 6.59E-11                       | sister chromatid cohesion acetyltransferase Eco1                                             |                  |
| CIMG_00497 | 3.48                     | 2.14E-15                     | 3.93                       | 1.49E-14                       | nucleolar essential protein 1 (EMG1/NEP1 methyltransferase)                                  |                  |
| CIMG_00502 | 1.90                     | 0.00007                      | 4.07                       | 9.64E-15                       | glutaryl-CoA dehydrogenase                                                                   | S                |
| CIMG_00509 | 10.38                    | 5.59E-37                     | 37.44                      | 1.15E-58                       | conserved hypothetical protein                                                               | G*               |
| CIMG_00530 | 1.93                     | 0.00002                      | 1.67                       | 0.01011                        | conserved hypothetical protein                                                               |                  |
| CIMG_00533 | 4.97                     | 8.21E-19                     | 12.76                      | 1.37E-31                       | ABC transporter                                                                              |                  |
| CIMG_00534 | 5.72                     | 5.00E-20                     | 33.02                      | 2.17E-45                       | glycerate kinase                                                                             |                  |
| CIMG_00535 | 1.80                     | 0.00003                      | 8.97                       | 1.12E-29                       | MFS multidrug transporter                                                                    |                  |
| CIMG_00539 | 1.94                     | 0.00002                      | 2.13                       | 4.17E-07                       | IFRD domain-containing protein                                                               |                  |

\*: Predicted secreted;

+: Gene under positive selection [19]; G: Gene gained in Coccidioides [19]

H, S: Up-regulated in Hyphae or Spherule by microarray [18]

**Table S2: All genes up-regulated in parasitic phase**

|            |       |          |       |          |                                                                                                      |   |
|------------|-------|----------|-------|----------|------------------------------------------------------------------------------------------------------|---|
| CIMG_00549 | 3.98  | 0.00010  | 3.52  | 0.00093  | conserved hypothetical protein                                                                       | + |
| CIMG_00551 | 1.98  | 0.00001  | 2.96  | 1.31E-07 | conserved hypothetical protein (Glycosyltransferase family 28 C-terminal domain)                     |   |
| CIMG_00553 | 3.48  | 2.66E-09 | 2.58  | 1.68E-06 | conserved hypothetical protein (Tat pathway signal sequence)                                         |   |
| CIMG_00554 | 4.01  | 0.00001  | 6.40  | 6.81E-12 | conserved hypothetical protein                                                                       |   |
| CIMG_00577 | 2.92  | 4.11E-10 | 3.75  | 1.33E-12 | hypothetical protein                                                                                 |   |
| CIMG_00580 | 2.31  | 3.93E-08 | 3.41  | 4.04E-10 | conserved hypothetical protein (COM1)                                                                |   |
| CIMG_00596 | 1.57  | 0.00193  | 1.59  | 0.00997  | conserved hypothetical protein (DUF1686)                                                             |   |
| CIMG_00601 | 5.29  | 1.66E-06 | 11.76 | 1.63E-14 | conserved hypothetical protein                                                                       |   |
| CIMG_00612 | 5.07  | 0.00009  | 7.15  | 9.95E-06 | conserved hypothetical protein                                                                       |   |
| CIMG_00618 | 2.65  | 2.56E-06 | 2.10  | 0.00098  | ubiquitin carboxyl-terminal hydrolase 12                                                             |   |
| CIMG_00622 | 2.46  | 1.87E-08 | 1.59  | 0.00623  | ubiquinone biosynthesis monooxygenase                                                                |   |
| CIMG_00628 | 1.69  | 0.01665  | 2.21  | 0.00417  | conserved hypothetical protein (MYND finger)                                                         |   |
| CIMG_00630 | 2.00  | 0.00001  | 2.09  | 0.00417  | lysine-specific histone demethylase Aof2                                                             |   |
| CIMG_00631 | 1.38  | 0.01886  | 2.02  | 0.00039  | golgi apparatus membrane protein tvp38                                                               |   |
| CIMG_00633 | 1.91  | 0.00004  | 3.74  | 2.51E-13 | citrate lyase beta subunit                                                                           |   |
| CIMG_00637 | 2.67  | 1.31E-09 | 1.65  | 0.02417  | conserved hypothetical protein                                                                       |   |
| CIMG_00638 | 11.12 | 2.57E-34 | 3.44  | 3.44E-10 | zinc knuckle transcription factor                                                                    |   |
| CIMG_00641 | 2.41  | 2.37E-08 | 19.85 | 3.45E-35 | conserved hypothetical protein                                                                       |   |
| CIMG_00643 | 2.81  | 1.19E-11 | 5.91  | 4.61E-22 | SreP protein                                                                                         |   |
| CIMG_00646 | 12.17 | 8.57E-36 | 15.42 | 5.06E-40 | conserved hypothetical protein                                                                       |   |
| CIMG_00648 | 2.26  | 0.00561  | 4.54  | 6.26E-07 | hypothetical protein                                                                                 |   |
| CIMG_00673 | 3.30  | 1.97E-09 | 2.35  | 0.00004  | WD repeat protein                                                                                    |   |
| CIMG_00682 | 3.21  | 0.00006  | 7.20  | 1.43E-11 | conserved hypothetical protein                                                                       |   |
| CIMG_00683 | 3.41  | 9.48E-13 | 3.80  | 2.21E-12 | conserved hypothetical protein                                                                       |   |
| CIMG_00686 | 3.18  | 1.91E-07 | 2.09  | 0.00030  | conserved hypothetical protein                                                                       |   |
| CIMG_00687 | 4.49  | 3.56E-10 | 2.67  | 0.00038  | conserved hypothetical protein                                                                       |   |
| CIMG_00700 | 1.41  | 0.00976  | 2.73  | 1.40E-09 | conserved hypothetical protein (histone-like transcription factor)                                   |   |
| CIMG_00702 | 5.00  | 3.47E-09 | 5.34  | 1.15E-14 | pyridoxamine phosphate oxidase                                                                       |   |
| CIMG_00703 | 2.56  | 0.00013  | 2.29  | 2.85E-06 | pentatricopeptide repeat protein                                                                     |   |
| CIMG_00704 | 4.23  | 4.03E-15 | 5.57  | 1.39E-19 | vacuolar membrane-associated protein IML1                                                            |   |
| CIMG_00708 | 2.40  | 3.03E-06 | 2.31  | 1.87E-07 | conserved hypothetical protein                                                                       |   |
| CIMG_00712 | 4.96  | 6.63E-16 | 2.13  | 0.00087  | conserved hypothetical protein (Helicase conserved C-terminal domain, SNF2 family N-terminal domain) |   |
| CIMG_00715 | 1.75  | 0.00022  | 4.08  | 8.01E-18 | conserved hypothetical protein                                                                       |   |
| CIMG_00722 | 2.85  | 0.00001  | 1.83  | 0.03304  | oxidoreductase                                                                                       |   |
| CIMG_00724 | 1.94  | 0.00003  | 1.72  | 0.00131  | Sec1 family superfamily                                                                              |   |
| CIMG_00760 | 4.37  | 2.99E-19 | 2.18  | 0.00019  | extracellular phytase                                                                                | * |
| CIMG_00776 | 1.98  | 0.00517  | 2.87  | 4.19E-06 | conserved hypothetical protein                                                                       |   |
| CIMG_00794 | 2.07  | 4.04E-06 | 2.50  | 3.06E-06 | conserved hypothetical protein                                                                       |   |
| CIMG_00801 | 3.01  | 1.67E-12 | 14.51 | 1.34E-39 | GDSL Lipase/Acylhydrolase                                                                            |   |
| CIMG_00815 | 2.70  | 2.71E-11 | 2.49  | 0.00003  | high-affinity nickel transporter nic1                                                                |   |
| CIMG_00816 | 2.26  | 0.00001  | 3.05  | 2.79E-06 | conserved hypothetical protein                                                                       |   |
| CIMG_00827 | 1.42  | 0.04451  | 1.61  | 0.00005  | acetyl-CoA carboxylase                                                                               |   |
| CIMG_00834 | 1.97  | 3.00E-06 | 1.48  | 0.00135  | 1-acylglycerol-3-phosphate O-acyltransferase                                                         |   |
| CIMG_00849 | 1.67  | 0.00066  | 1.51  | 0.01650  | transcription factor TFIIE complex, alpha subunit                                                    |   |
| CIMG_00861 | 1.79  | 0.00007  | 3.32  | 1.97E-10 | glutathione S-transferase                                                                            |   |
| CIMG_00867 | 1.89  | 0.00002  | 3.05  | 7.32E-10 | U3 small nucleolar ribonucleoprotein IMP3                                                            |   |
| CIMG_00869 | 2.30  | 0.00001  | 3.21  | 1.73E-08 | conserved hypothetical protein                                                                       |   |
| CIMG_00877 | 1.97  | 0.01693  | 2.24  | 0.00244  | di/tri peptide transporter 2                                                                         |   |
| CIMG_00899 | 4.15  | 4.08E-16 | 2.21  | 5.84E-06 | CorA family metal ion transporter                                                                    |   |
| CIMG_00921 | 1.98  | 0.00429  | 1.98  | 0.01017  | conserved hypothetical protein                                                                       |   |
| CIMG_00922 | 2.23  | 4.56E-08 | 3.13  | 4.17E-11 | conserved hypothetical protein (Patatin-like phospholipase)                                          |   |
| CIMG_00928 | 1.52  | 0.00689  | 1.72  | 0.00011  | Ras2                                                                                                 |   |
| CIMG_00937 | 4.64  | 2.89E-12 | 2.54  | 0.00003  | conserved hypothetical protein                                                                       |   |
| CIMG_00942 | 2.24  | 0.00027  | 2.26  | 0.00067  | conserved hypothetical protein                                                                       |   |
| CIMG_00945 | 1.63  | 0.00447  | 1.71  | 0.01397  | cyclin-dependent protein kinase complex component                                                    |   |
| CIMG_00962 | 1.95  | 0.00002  | 1.55  | 0.01118  | RNA polymerase II transcriptional coactivator                                                        |   |
| CIMG_00963 | 3.04  | 5.46E-11 | 1.98  | 0.00036  | conserved hypothetical protein (dual specificity phosphatase catalytic domain)                       |   |
| CIMG_00973 | 1.66  | 0.01346  | 1.78  | 0.01690  | autophagy protein Atg22                                                                              |   |
| CIMG_00977 | 2.05  | 0.00001  | 1.89  | 0.00027  | conserved hypothetical protein (TFIIIC subunit)                                                      |   |
| CIMG_00982 | 1.62  | 0.00113  | 2.43  | 9.98E-06 | conserved hypothetical protein (pentatricopeptide repeat domain)                                     |   |
| CIMG_00994 | 2.93  | 2.02E-06 | 2.45  | 0.01159  | conserved hypothetical protein                                                                       |   |
| CIMG_01005 | 4.41  | 6.84E-13 | 1.77  | 0.02097  | conserved hypothetical protein                                                                       |   |
| CIMG_01007 | 3.04  | 4.54E-13 | 3.19  | 1.36E-09 | MFS multidrug transporter (benomyl/methotrexate resistance protein)                                  |   |
| CIMG_01019 | 1.35  | 0.04686  | 3.07  | 1.54E-12 | arginine N-methyltransferase 2                                                                       |   |
| CIMG_01020 | 2.84  | 4.61E-07 | 2.52  | 0.00002  | conserved hypothetical protein                                                                       |   |
| CIMG_01021 | 3.81  | 5.30E-13 | 2.80  | 2.26E-07 | conserved hypothetical protein                                                                       | * |
| CIMG_01025 | 1.34  | 0.02874  | 2.80  | 3.52E-10 | NADH-ubiquinone oxidoreductase 24 kDa subunit                                                        |   |
| CIMG_01026 | 3.89  | 1.18E-17 | 6.89  | 4.25E-22 | conserved hypothetical protein                                                                       |   |
| CIMG_01034 | 1.75  | 0.00043  | 1.44  | 0.02169  | conserved hypothetical protein                                                                       |   |
| CIMG_01036 | 2.09  | 1.91E-06 | 5.33  | 3.16E-16 | taurine catabolism dioxygenase TauD                                                                  |   |
| CIMG_01037 | 1.77  | 0.00025  | 2.90  | 5.10E-10 | acetate non-utilizing protein 9                                                                      |   |
| CIMG_01053 | 2.81  | 2.00E-11 | 29.69 | 1.16E-52 | oxidoreductase                                                                                       |   |
| CIMG_01055 | 3.29  | 1.83E-06 | 2.69  | 0.00047  | HIT finger domain-containing protein                                                                 |   |
| CIMG_01056 | 1.41  | 0.02699  | 1.73  | 0.00046  | conserved hypothetical protein                                                                       |   |
| CIMG_01058 | 2.33  | 2.95E-08 | 1.95  | 0.00073  | vacuolar fusion protein MON1                                                                         |   |
| CIMG_01062 | 2.12  | 2.33E-06 | 2.95  | 2.21E-07 | prolyl peptidase                                                                                     |   |
| CIMG_01063 | 3.33  | 4.13E-11 | 5.23  | 1.89E-17 | conserved hypothetical protein                                                                       |   |

\*: Predicted secreted;

+: Gene under positive selection [19]; G: Gene gained in Coccidioides [19]

H, S: Up-regulated in Hyphae or Spherule by microarray [18]

**Table S2: All genes up-regulated in parasitic phase**

|            |       |          |       |          |                                                                                     |   |
|------------|-------|----------|-------|----------|-------------------------------------------------------------------------------------|---|
| CIMG_01065 | 1.64  | 0.00100  | 1.96  | 7.09E-06 | conserved hypothetical protein                                                      |   |
| CIMG_01067 | 7.96  | 2.17E-30 | 6.24  | 1.58E-23 | conserved hypothetical protein (Acetyltransferase (GNAT) family)                    |   |
| CIMG_01069 | 2.67  | 1.40E-09 | 2.17  | 0.00022  | fungus-specific transcription factor domain-containing protein                      |   |
| CIMG_01074 | 1.83  | 0.00003  | 1.80  | 0.00268  | conserved hypothetical protein                                                      |   |
| CIMG_01075 | 3.91  | 1.85E-14 | 3.24  | 0.00010  | conserved hypothetical protein (TAP42-like family)                                  |   |
| CIMG_01086 | 2.17  | 0.00116  | 2.28  | 0.00331  | golgi reassembly stacking protein                                                   |   |
| CIMG_01087 | 1.90  | 0.00023  | 2.93  | 3.66E-10 | RNA methylase                                                                       |   |
| CIMG_01093 | 1.69  | 0.00136  | 1.78  | 0.00670  | DNA damage repair protein Mus42                                                     |   |
| CIMG_01110 | 2.32  | 1.04E-07 | 1.86  | 0.00017  | conserved hypothetical protein                                                      |   |
| CIMG_01117 | 1.81  | 0.00040  | 3.04  | 3.84E-08 | conserved hypothetical protein                                                      |   |
| CIMG_01120 | 2.42  | 0.00001  | 51.24 | 3.45E-48 | putative sphingolipid long chain base-responsive protein LSP1                       |   |
| CIMG_01126 | 2.25  | 6.93E-07 | 1.94  | 0.00030  | conserved hypothetical protein (DUF571)                                             |   |
| CIMG_01128 | 2.75  | 1.95E-10 | 2.59  | 7.24E-10 | conserved hypothetical protein                                                      |   |
| CIMG_01138 | 5.25  | 0.00001  | 2.11  | 0.02252  | conserved hypothetical protein                                                      |   |
| CIMG_01170 | 2.36  | 0.00026  | 2.74  | 0.04083  | conserved hypothetical protein                                                      |   |
| CIMG_01176 | 2.17  | 7.33E-07 | 1.60  | 0.00241  | conserved hypothetical protein (3-hydroxyacyl-CoA dehydrogenase)                    |   |
| CIMG_01177 | 5.15  | 8.88E-16 | 1.91  | 0.00008  | conserved hypothetical protein (putative flavoprotein)                              |   |
| CIMG_01195 | 2.42  | 6.24E-09 | 2.69  | 3.41E-08 | xaa-Pro dipeptidase app                                                             |   |
| CIMG_01198 | 1.93  | 0.00070  | 3.63  | 2.12E-09 | acetyltransferase (GNAT family)                                                     |   |
| CIMG_01207 | 1.95  | 0.00058  | 2.42  | 0.00010  | Fum8p                                                                               |   |
| CIMG_01209 | 11.92 | 3.37E-28 | 23.03 | 3.33E-32 | SUR2 (fatty acid hydroxylase superfamily)                                           |   |
| CIMG_01210 | 8.86  | 2.74E-26 | 6.55  | 1.34E-26 | conserved hypothetical protein (Alkaline phytoeceramidase (aPHC))                   |   |
| CIMG_01211 | 9.37  | 6.01E-32 | 64.31 | 1.61E-65 | conserved hypothetical protein (Major Facilitator Superfamily)                      |   |
| CIMG_01213 | 2.68  | 3.54E-11 | 2.07  | 0.00002  | conserved hypothetical protein                                                      |   |
| CIMG_01214 | 2.33  | 0.00012  | 1.85  | 0.00555  | conserved hypothetical protein                                                      |   |
| CIMG_01227 | 3.93  | 2.52E-13 | 1.84  | 0.00846  | ubiquitin C-terminal hydrolase                                                      |   |
| CIMG_01257 | 5.12  | 6.49E-21 | 6.76  | 2.94E-24 | methionine-R-sulfoxide reductase                                                    |   |
| CIMG_01259 | 4.32  | 0.00005  | 1.91  | 0.03834  | conserved hypothetical protein                                                      | * |
| CIMG_01260 | 2.77  | 0.00001  | 8.65  | 8.68E-15 | conserved hypothetical protein (developmentally regulated MAPK interacting protein) | * |
| CIMG_01262 | 2.47  | 0.00001  | 2.91  | 2.38E-06 | conserved hypothetical protein                                                      |   |
| CIMG_01273 | 1.67  | 0.00063  | 5.80  | 1.16E-20 | sulfate permease II                                                                 |   |
| CIMG_01274 | 1.60  | 0.00192  | 2.63  | 1.14E-07 | mRNA cap methyltransferase                                                          |   |
| CIMG_01276 | 4.98  | 0.00001  | 5.94  | 1.51E-13 | cyclohexanone monooxygenase                                                         |   |
| CIMG_01277 | 3.98  | 0.00002  | 6.10  | 1.79E-09 | conserved hypothetical protein                                                      |   |
| CIMG_01287 | 2.08  | 0.00001  | 1.95  | 0.00204  | conserved hypothetical protein (Rap1 Myb domain)                                    |   |
| CIMG_01297 | 2.67  | 1.94E-07 | 1.65  | 0.00814  | CAIB/BAIF family enzyme                                                             |   |
| CIMG_01300 | 2.82  | 6.98E-11 | 2.51  | 9.88E-07 | catechol dioxygenase                                                                |   |
| CIMG_01301 | 1.51  | 0.01149  | 2.24  | 0.00007  | amidohydrolase                                                                      |   |
| CIMG_01306 | 3.12  | 4.00E-12 | 2.44  | 1.32E-06 | dynamain family protein                                                             |   |
| CIMG_01309 | 1.64  | 0.00212  | 2.63  | 1.39E-07 | cytochrome c oxidase assembly protein                                               |   |
| CIMG_01311 | 3.37  | 7.92E-11 | 4.29  | 1.02E-09 | conserved hypothetical protein                                                      |   |
| CIMG_01316 | 1.36  | 0.04529  | 1.91  | 7.52E-06 | biotin synthase                                                                     |   |
| CIMG_01324 | 3.83  | 1.16E-13 | 10.45 | 7.92E-35 | conserved hypothetical protein                                                      |   |
| CIMG_01332 | 2.38  | 1.00E-07 | 4.27  | 2.38E-13 | FMP52                                                                               |   |
| CIMG_01333 | 5.05  | 1.34E-21 | 13.33 | 2.78E-40 | conserved hypothetical protein                                                      |   |
| CIMG_01359 | 1.40  | 0.02440  | 3.32  | 1.67E-10 | NADH-ubiquinone oxidoreductase subunit                                              |   |
| CIMG_01377 | 3.06  | 1.53E-09 | 6.70  | 5.28E-19 | lipase/esterase                                                                     |   |
| CIMG_01391 | 2.10  | 0.00004  | 2.73  | 0.00004  | conserved hypothetical protein (Major Facilitator Superfamily)                      |   |
| CIMG_01392 | 3.50  | 7.89E-07 | 4.30  | 0.00008  | conserved hypothetical protein                                                      |   |
| CIMG_01393 | 2.16  | 1.66E-07 | 1.73  | 0.00190  | conserved hypothetical protein                                                      |   |
| CIMG_01398 | 2.02  | 0.00017  | 1.81  | 0.00268  | extracellular lipase                                                                |   |
| CIMG_01402 | 1.82  | 0.00005  | 3.12  | 3.28E-10 | 6-hydroxy-D-nicotine oxidase                                                        |   |
| CIMG_01411 | 6.77  | 6.99E-15 | 3.92  | 7.22E-09 | conserved hypothetical protein                                                      |   |
| CIMG_01424 | 1.77  | 0.00032  | 3.02  | 9.59E-11 | conserved hypothetical protein (Ankyrin repeats, F-box domain)                      |   |
| CIMG_01439 | 2.06  | 0.00002  | 1.42  | 0.04155  | l-allo-threonine aldolase                                                           |   |
| CIMG_01444 | 15.04 | 1.32E-40 | 8.53  | 4.93E-33 | MFS peptide transporter Ptr2 (POT family)                                           |   |
| CIMG_01456 | 2.81  | 8.08E-10 | 3.25  | 1.31E-10 | conserved hypothetical protein                                                      |   |
| CIMG_01457 | 2.39  | 1.19E-07 | 2.66  | 4.73E-07 | mitochondrial chaperone Frataxin                                                    |   |
| CIMG_01464 | 1.73  | 0.00049  | 2.75  | 2.23E-08 | prenyltransferase alpha subunit repeat protein                                      |   |
| CIMG_01466 | 3.53  | 3.75E-13 | 4.89  | 2.85E-16 | 4-hydroxyphenylpyruvate dioxygenase                                                 |   |
| CIMG_01467 | 1.75  | 0.00187  | 1.74  | 0.03616  | sister chromatid cohesion protein Ctf8                                              |   |
| CIMG_01472 | 3.02  | 6.85E-12 | 6.34  | 1.45E-27 | iron sulfur assembly protein 1                                                      |   |
| CIMG_01476 | 1.55  | 0.00182  | 1.92  | 0.00010  | 50S ribosomal protein L24                                                           |   |
| CIMG_01478 | 2.37  | 1.30E-07 | 1.55  | 0.00878  | steroid alpha reductase (3-oxo-5-alpha-steroid 4-dehydrogenase)                     |   |
| CIMG_01485 | 3.13  | 0.00001  | 2.59  | 0.00054  | conserved hypothetical protein                                                      |   |
| CIMG_01488 | 2.62  | 2.93E-10 | 4.05  | 8.68E-15 | MFS multidrug transporter                                                           |   |
| CIMG_01489 | 2.10  | 7.72E-07 | 2.89  | 3.58E-08 | SNF2 family helicase                                                                |   |
| CIMG_01499 | 3.14  | 7.04E-09 | 3.53  | 1.17E-09 | AAA family ATPase                                                                   |   |
| CIMG_01508 | 4.26  | 9.24E-17 | 16.66 | 1.36E-35 | C2 domain-containing protein                                                        |   |
| CIMG_01513 | 1.69  | 0.00108  | 2.59  | 8.42E-08 | conserved hypothetical protein (SET domain-containing protein)                      |   |
| CIMG_01527 | 3.89  | 7.89E-09 | 2.03  | 0.00119  | hypothetical protein                                                                |   |
| CIMG_01556 | 1.77  | 0.00004  | 2.36  | 6.59E-08 | prenyltransferase                                                                   |   |
| CIMG_01559 | 3.10  | 1.61E-08 | 2.00  | 0.02190  | conserved hypothetical protein                                                      |   |
| CIMG_01560 | 3.19  | 1.54E-12 | 1.33  | 0.01843  | conserved hypothetical protein (WW-domain ligand protein)                           |   |
| CIMG_01562 | 2.28  | 3.18E-08 | 3.91  | 1.83E-15 | cell surface receptor/MFS transporter                                               |   |
| CIMG_01564 | 1.35  | 0.03512  | 2.64  | 1.71E-07 | involucrin repeat protein                                                           |   |
| CIMG_01569 | 2.68  | 1.67E-09 | 4.29  | 1.30E-13 | D-isomer specific 2-hydroxyacid dehydrogenase                                       |   |
| CIMG_01577 | 1.47  | 0.00780  | 2.42  | 6.19E-08 | conserved hypothetical protein                                                      |   |
| CIMG_01603 | 2.25  | 0.00001  | 4.39  | 1.85E-10 | phosphotransferase enzyme family protein                                            |   |

\*: Predicted secreted;

+: Gene under positive selection [19]; G: Gene gained in Coccidioides [19]

H, S: Up-regulated in Hyphae or Spherule by microarray [18]

**Table S2: All genes up-regulated in parasitic phase**

|            |       |          |        |          |                                                                                  |   |
|------------|-------|----------|--------|----------|----------------------------------------------------------------------------------|---|
| CIMG_01609 | 2.94  | 4.50E-12 | 5.10   | 7.67E-21 | glyoxylate reductase                                                             |   |
| CIMG_01610 | 1.49  | 0.00668  | 1.72   | 0.00164  | cell cycle control protein                                                       |   |
| CIMG_01615 | 4.32  | 1.31E-16 | 2.90   | 6.08E-08 | conserved hypothetical protein                                                   |   |
| CIMG_01618 | 5.85  | 2.86E-12 | 4.93   | 0.00002  | conserved hypothetical protein                                                   |   |
| CIMG_01623 | 2.12  | 9.94E-07 | 1.82   | 0.00522  | caffeine-induced death protein Cid2                                              |   |
| CIMG_01624 | 4.91  | 4.15E-13 | 3.80   | 4.19E-08 | conserved hypothetical protein                                                   |   |
| CIMG_01634 | 1.45  | 0.01068  | 1.43   | 0.04210  | vacuolar protein sorting-associated protein 26                                   |   |
| CIMG_01642 | 1.64  | 0.00242  | 1.41   | 0.04953  | integral membrane protein                                                        |   |
| CIMG_01656 | 1.81  | 0.00238  | 2.00   | 0.02943  | conserved hypothetical protein                                                   |   |
| CIMG_01657 | 4.76  | 1.12E-20 | 2.48   | 0.00025  | conserved hypothetical protein                                                   |   |
| CIMG_01675 | 2.40  | 0.00001  | 2.19   | 0.00037  | conserved hypothetical protein                                                   |   |
| CIMG_01702 | 6.88  | 1.70E-15 | 2.86   | 1.33E-08 | CRAL/TRIO domain-containing protein                                              |   |
| CIMG_01703 | 5.58  | 1.01E-19 | 4.76   | 2.02E-18 | conserved hypothetical protein (DASH complex subunit Dam1)                       |   |
| CIMG_01704 | 5.32  | 7.81E-24 | 1.71   | 0.00234  | ubiquitin C-terminal hydrolase Ubp8                                              |   |
| CIMG_01716 | 2.10  | 6.59E-07 | 1.54   | 0.01429  | uroporphyrinogen-III synthase                                                    |   |
| CIMG_01720 | 1.51  | 0.04364  | 2.11   | 0.00041  | conserved hypothetical protein (mitochondrial protein Fmp26)                     |   |
| CIMG_01725 | 1.75  | 0.00018  | 1.95   | 0.00095  | mitochondrial carrier protein                                                    |   |
| CIMG_01732 | 1.61  | 0.00052  | 5.96   | 1.35E-23 | conserved hypothetical protein                                                   |   |
| CIMG_01733 | 3.25  | 2.02E-10 | 2.99   | 2.79E-09 | vacuolar sorting protein 4b                                                      |   |
| CIMG_01738 | 1.58  | 0.00400  | 3.47   | 1.39E-12 | conserved hypothetical protein                                                   |   |
| CIMG_01739 | 3.86  | 2.98E-15 | 2.63   | 1.65E-08 | stress response transcription factor SrrA/Skn7                                   |   |
| CIMG_01742 | 4.48  | 9.32E-12 | 2.03   | 0.00043  | MFS multidrug transporter                                                        |   |
| CIMG_01743 | 1.34  | 0.04037  | 1.58   | 0.00899  | NGG1 interacting factor Nif3                                                     |   |
| CIMG_01744 | 1.72  | 0.00691  | 1.86   | 0.02502  | golgi transport complex subunit Cog6                                             |   |
| CIMG_01745 | 2.73  | 4.50E-09 | 4.84   | 6.13E-14 | conserved hypothetical protein                                                   |   |
| CIMG_01749 | 10.74 | 4.56E-10 | 124.65 | 1.46E-43 | heat shock protein 30                                                            |   |
| CIMG_01750 | 6.59  | 1.09E-25 | 5.81   | 1.70E-17 | secreted serine protease (Subtilase family)                                      | * |
| CIMG_01754 | 5.41  | 3.24E-13 | 5.85   | 3.99E-15 | serine palmitoyltransferase 1                                                    |   |
| CIMG_01762 | 5.80  | 6.20E-25 | 4.12   | 2.95E-16 | conserved hypothetical protein (BAH domain, C-5 cytosine-specific DNA methylase) |   |
| CIMG_01769 | 4.96  | 1.26E-09 | 3.22   | 0.00045  | hypothetical protein                                                             | * |
| CIMG_01775 | 3.06  | 0.00023  | 2.89   | 0.00394  | conserved hypothetical protein                                                   |   |
| CIMG_01776 | 3.98  | 3.73E-13 | 4.79   | 5.22E-20 | acetamidase/formamidase                                                          |   |
| CIMG_01781 | 4.27  | 1.23E-19 | 5.57   | 7.47E-24 | PH domain-containing protein                                                     |   |
| CIMG_01783 | 1.43  | 0.02015  | 1.64   | 0.00229  | ubiquitin C-terminal hydrolase                                                   |   |
| CIMG_01791 | 1.74  | 0.00012  | 1.47   | 0.01182  | phosphatidylserine synthase                                                      |   |
| CIMG_01800 | 3.84  | 0.00179  | 4.21   | 0.00054  | conserved hypothetical protein                                                   |   |
| CIMG_01801 | 4.08  | 1.28E-13 | 3.61   | 1.58E-08 | sugar transporter                                                                |   |
| CIMG_01803 | 2.21  | 5.44E-07 | 3.01   | 4.16E-09 | conserved hypothetical protein                                                   |   |
| CIMG_01809 | 2.55  | 6.01E-10 | 6.32   | 1.97E-27 | glycerol dehydrogenase                                                           |   |
| CIMG_01811 | 6.93  | 1.13E-27 | 2.11   | 0.00077  | conserved hypothetical protein (F-box domain-containing protein)                 |   |
| CIMG_01813 | 1.49  | 0.00678  | 1.66   | 0.02256  | phosducin family protein                                                         |   |
| CIMG_01815 | 1.72  | 0.01048  | 2.61   | 0.00015  | conserved hypothetical protein                                                   | * |
| CIMG_01817 | 4.36  | 1.47E-11 | 3.57   | 1.21E-09 | casein kinase I isoform epsilon                                                  |   |
| CIMG_01818 | 3.48  | 0.00114  | 4.10   | 0.01275  | conserved hypothetical protein                                                   |   |
| CIMG_01823 | 2.58  | 0.00287  | 2.26   | 0.00825  | conserved hypothetical protein                                                   |   |
| CIMG_01826 | 3.43  | 4.96E-11 | 3.79   | 5.89E-09 | conserved hypothetical protein                                                   |   |
| CIMG_01828 | 1.74  | 0.00022  | 4.81   | 3.12E-19 | conserved hypothetical protein                                                   |   |
| CIMG_01837 | 1.50  | 0.00881  | 1.78   | 0.00348  | mitochondrial genome maintenance protein Mgr2                                    |   |
| CIMG_01843 | 1.80  | 0.00051  | 1.62   | 0.02253  | mitotic spindle biogenesis protein Spc19                                         |   |
| CIMG_01845 | 2.21  | 1.24E-07 | 2.72   | 3.32E-08 | conserved hypothetical protein                                                   |   |
| CIMG_01846 | 1.85  | 0.00064  | 1.58   | 0.02088  | conserved hypothetical protein                                                   | * |
| CIMG_01852 | 1.66  | 0.00043  | 1.31   | 0.03128  | conserved hypothetical protein (Phenazine biosynthesis-like protein)             |   |
| CIMG_01853 | 3.51  | 0.00002  | 2.95   | 0.00124  | hypothetical protein                                                             | * |
| CIMG_01856 | 2.88  | 2.73E-08 | 1.88   | 0.00078  | iron-regulated transporter                                                       |   |
| CIMG_01873 | 1.71  | 0.00009  | 4.74   | 5.32E-13 | conserved hypothetical protein                                                   | * |
| CIMG_01881 | 2.48  | 4.35E-10 | 6.55   | 4.90E-24 | conserved hypothetical protein                                                   |   |
| CIMG_01888 | 1.42  | 0.02045  | 2.01   | 0.00005  | prefoldin subunit 6                                                              |   |
| CIMG_01895 | 1.36  | 0.03415  | 1.57   | 0.02359  | conserved hypothetical protein                                                   |   |
| CIMG_01896 | 2.45  | 2.59E-06 | 1.79   | 0.03239  | conserved hypothetical protein                                                   |   |
| CIMG_01898 | 1.88  | 0.00222  | 2.16   | 0.00009  | conserved hypothetical protein                                                   |   |
| CIMG_01901 | 4.39  | 8.94E-14 | 1.54   | 0.03685  | conserved hypothetical protein (RNA recognition motif. )                         |   |
| CIMG_01907 | 7.03  | 0.00001  | 9.95   | 9.37E-10 | conserved hypothetical protein                                                   |   |
| CIMG_01908 | 2.77  | 0.00029  | 5.48   | 3.97E-12 | conserved hypothetical protein                                                   |   |
| CIMG_01910 | 1.39  | 0.04658  | 2.40   | 0.00002  | conserved hypothetical protein (DUF2434)                                         |   |
| CIMG_01914 | 5.30  | 0.00006  | 2.93   | 0.01096  | conserved hypothetical protein                                                   |   |
| CIMG_01916 | 1.55  | 0.01307  | 2.03   | 0.00397  | ABC efflux transporter                                                           |   |
| CIMG_01920 | 2.60  | 0.00897  | 3.57   | 0.00240  | conserved hypothetical protein                                                   |   |
| CIMG_01927 | 1.53  | 0.00751  | 4.33   | 8.67E-12 | hypothetical protein                                                             |   |
| CIMG_01932 | 1.53  | 0.00230  | 1.79   | 0.00247  | peptidyl-tRNA hydrolase domain-containing protein                                |   |
| CIMG_01935 | 3.92  | 1.26E-11 | 10.36  | 1.05E-25 | conserved hypothetical protein                                                   | * |
| CIMG_01943 | 1.44  | 0.00456  | 2.51   | 3.48E-08 | exosome complex exonuclease Rrp6                                                 |   |
| CIMG_01951 | 1.34  | 0.03725  | 1.70   | 0.00710  | meiotically up-regulated 65 protein                                              |   |
| CIMG_01959 | 3.26  | 4.03E-07 | 2.64   | 0.00010  | conserved hypothetical protein                                                   |   |
| CIMG_01964 | 4.17  | 6.46E-13 | 2.01   | 0.00354  | conserved hypothetical protein (Hemopexin)                                       |   |
| CIMG_01980 | 1.76  | 0.00008  | 1.77   | 0.00081  | conserved hypothetical protein (putative chorismate mutase type II)              | * |
| CIMG_01994 | 2.36  | 4.55E-07 | 3.29   | 1.82E-10 | alpha,alpha-trehalase                                                            |   |
| CIMG_02040 | 1.55  | 0.00810  | 1.51   | 0.04166  | conserved hypothetical protein                                                   |   |
| CIMG_02047 | 4.72  | 6.85E-13 | 4.43   | 2.62E-15 | trehalose-phosphatase                                                            | S |
| CIMG_02063 | 1.91  | 4.50E-06 | 2.34   | 4.00E-06 | aldose 1-epimerase                                                               |   |

\*: Predicted secreted;

+: Gene under positive selection [19]; G: Gene gained in Coccidioides [19]

H, S: Up-regulated in Hyphae or Spherule by microarray [18]

**Table S2: All genes up-regulated in parasitic phase**

|            |       |          |        |          |                                                                                                  |            |
|------------|-------|----------|--------|----------|--------------------------------------------------------------------------------------------------|------------|
| CIMG_02065 | 2.77  | 8.50E-07 | 2.15   | 0.00005  | nicotinate-nucleotide pyrophosphorylase                                                          |            |
| CIMG_02069 | 4.05  | 5.59E-08 | 4.38   | 2.21E-08 | conserved hypothetical protein                                                                   |            |
| CIMG_02073 | 2.68  | 3.80E-07 | 1.65   | 0.01173  | prp 8 CRoW domain-containing protein                                                             | <b>G *</b> |
| CIMG_02106 | 1.57  | 0.01657  | 1.61   | 0.00494  | conserved hypothetical protein                                                                   |            |
| CIMG_02125 | 1.82  | 0.00009  | 1.69   | 0.00334  | conserved hypothetical protein                                                                   |            |
| CIMG_02137 | 2.03  | 0.00004  | 1.91   | 0.00078  | ubiquitin carboxyl-terminal hydrolase, family 1 protein                                          |            |
| CIMG_02159 | 1.58  | 0.00188  | 1.90   | 0.00102  | ribonuclease P complex subunit Pop2                                                              | <b>+</b>   |
| CIMG_02178 | 1.89  | 0.00233  | 3.48   | 5.88E-11 | ureidoglycolate hydrolase                                                                        | <b>G</b>   |
| CIMG_02181 | 1.78  | 0.00013  | 1.62   | 0.01018  | serine/threonine protein kinase                                                                  |            |
| CIMG_02188 | 3.36  | 1.31E-09 | 4.05   | 1.27E-10 | tripeptidyl peptidase SED3                                                                       | <b>*</b>   |
| CIMG_02189 | 8.63  | 1.75E-09 | 3.85   | 0.00027  | hypothetical protein                                                                             |            |
| CIMG_02190 | 1.96  | 1.65E-06 | 10.78  | 1.10E-36 | sulfonate biosynthesis enzyme                                                                    |            |
| CIMG_02195 | 3.71  | 0.00010  | 4.45   | 5.26E-07 | conserved hypothetical protein                                                                   |            |
| CIMG_02209 | 2.69  | 0.00890  | 6.05   | 0.00006  | conserved hypothetical protein                                                                   |            |
| CIMG_02212 | 1.90  | 0.00001  | 1.98   | 0.00152  | conserved hypothetical protein (C-x8-C-x5-C-x3-H type zinc finger)                               |            |
| CIMG_02220 | 2.40  | 0.00001  | 2.14   | 0.00021  | YjeF domain-containing protein (carbohydrate kinase, YjeF homolog)                               |            |
| CIMG_02228 | 3.23  | 0.00100  | 2.94   | 0.00102  | conserved hypothetical protein                                                                   |            |
| CIMG_02255 | 3.19  | 3.17E-09 | 2.11   | 0.00123  | conserved hypothetical protein                                                                   |            |
| CIMG_02256 | 3.87  | 6.28E-11 | 3.15   | 8.28E-09 | conserved hypothetical protein                                                                   |            |
| CIMG_02272 | 1.34  | 0.02853  | 1.80   | 0.00171  | conserved hypothetical protein                                                                   |            |
| CIMG_02292 | 3.55  | 6.23E-11 | 13.00  | 5.30E-32 | D2 protein (phosphatidylethanolamine-binding protein)                                            |            |
| CIMG_02305 | 1.49  | 0.03775  | 12.08  | 1.97E-20 | conserved hypothetical protein                                                                   |            |
| CIMG_02339 | 1.88  | 0.00027  | 5.68   | 3.31E-18 | succinate dehydrogenase flavoprotein subunit                                                     |            |
| CIMG_02344 | 1.60  | 0.01933  | 8.52   | 4.40E-21 | conserved hypothetical protein                                                                   |            |
| CIMG_02367 | 1.50  | 0.04058  | 2.83   | 6.01E-06 | conserved hypothetical protein                                                                   |            |
| CIMG_02371 | 1.85  | 0.00003  | 1.83   | 0.00291  | conserved hypothetical protein                                                                   |            |
| CIMG_02373 | 2.91  | 1.64E-12 | 4.80   | 3.07E-15 | protein kinase                                                                                   |            |
| CIMG_02376 | 1.63  | 0.00362  | 1.99   | 0.00012  | conserved hypothetical protein                                                                   | <b>+</b>   |
| CIMG_02379 | 1.69  | 0.00048  | 1.91   | 0.00021  | 3-demethylubiquinone-9 3-methyltransferase                                                       |            |
| CIMG_02380 | 1.77  | 0.00109  | 1.73   | 0.01859  | arsenite resistance protein Ars2                                                                 |            |
| CIMG_02388 | 5.58  | 2.70E-06 | 11.06  | 5.35E-09 | conserved hypothetical protein                                                                   |            |
| CIMG_02400 | 15.16 | 1.17E-36 | 14.96  | 8.47E-45 | endo 1,5-alpha-arabinase                                                                         | <b>*</b>   |
| CIMG_02403 | 5.27  | 2.77E-09 | 3.64   | 7.15E-06 | conserved hypothetical protein                                                                   |            |
| CIMG_02404 | 2.68  | 2.57E-06 | 4.42   | 8.56E-10 | conserved hypothetical protein                                                                   |            |
| CIMG_02409 | 9.43  | 4.66E-26 | 5.61   | 3.54E-15 | conserved hypothetical protein                                                                   |            |
| CIMG_02433 | 1.83  | 0.00100  | 2.91   | 3.48E-07 | conserved hypothetical protein (DUF77)                                                           |            |
| CIMG_02437 | 1.81  | 0.00012  | 1.58   | 0.03462  | SYF2 splicing factor domain-containing protein                                                   |            |
| CIMG_02439 | 1.53  | 0.04871  | 4.40   | 1.45E-08 | conserved hypothetical protein                                                                   |            |
| CIMG_02469 | 3.59  | 2.24E-14 | 8.49   | 9.67E-28 | conserved hypothetical protein                                                                   |            |
| CIMG_02470 | 3.14  | 1.27E-09 | 11.72  | 9.96E-37 | NAD binding Rossmann fold oxidoreductase                                                         |            |
| CIMG_02481 | 1.82  | 0.00013  | 2.27   | 0.00001  | conserved hypothetical protein                                                                   |            |
| CIMG_02483 | 2.34  | 3.48E-08 | 3.12   | 7.21E-10 | mitochondrial escape protein 2                                                                   |            |
| CIMG_02486 | 1.47  | 0.01426  | 2.74   | 1.37E-06 | glutamate synthase                                                                               |            |
| CIMG_02491 | 3.63  | 4.18E-17 | 124.83 | 2.08E-89 | phosphatidylserine decarboxylase                                                                 | <b>*</b>   |
| CIMG_02496 | 5.91  | 1.44E-22 | 1.94   | 0.00063  | conserved hypothetical protein (Glyoxalase/Bleomycin resistance protein/Dioxigenase superfamily) |            |
| CIMG_02498 | 1.66  | 0.00093  | 2.05   | 0.00004  | conserved hypothetical protein                                                                   |            |
| CIMG_02527 | 2.38  | 0.00654  | 2.31   | 0.00208  | conserved hypothetical protein (Ubiquitin carboxyl-terminal hydrolase)                           |            |
| CIMG_02529 | 4.08  | 2.29E-10 | 6.65   | 1.98E-18 | conserved hypothetical protein                                                                   |            |
| CIMG_02532 | 3.05  | 3.77E-11 | 2.64   | 5.41E-08 | tRNA methyltransferase                                                                           |            |
| CIMG_02567 | 2.09  | 6.35E-07 | 3.05   | 7.26E-11 | rRNA processing protein Fcf2                                                                     |            |
| CIMG_02601 | 2.02  | 0.00001  | 2.99   | 2.20E-11 | mitochondrial folate carrier protein Flx1                                                        |            |
| CIMG_02602 | 4.30  | 9.90E-16 | 3.52   | 1.04E-12 | conserved hypothetical protein                                                                   |            |
| CIMG_02604 | 3.74  | 3.64E-11 | 3.06   | 3.57E-06 | conserved hypothetical protein                                                                   |            |
| CIMG_02620 | 2.11  | 0.00020  | 1.56   | 0.04948  | conserved hypothetical protein (Ubiquitin related modifier Urm1)                                 |            |
| CIMG_02621 | 1.47  | 0.01195  | 1.54   | 0.02388  | RNA polymerase II Elongator subunit                                                              |            |
| CIMG_02623 | 1.65  | 0.01213  | 2.35   | 0.00006  | tRNA isopentenyltransferase                                                                      |            |
| CIMG_02627 | 1.97  | 0.00027  | 2.00   | 0.00124  | acetamidase                                                                                      |            |
| CIMG_02628 | 15.76 | 4.82E-44 | 36.23  | 5.58E-56 | Arp2/3 complex subunit Arc16                                                                     |            |
| CIMG_02629 | 7.94  | 2.25E-30 | 3.95   | 1.98E-12 | conserved hypothetical protein (Histidine acid phosphatase)                                      | <b>*</b>   |
| CIMG_02639 | 1.43  | 0.01167  | 2.25   | 3.16E-06 | homoaconitate hydratase                                                                          |            |
| CIMG_02651 | 1.62  | 0.00175  | 56.84  | 3.90E-69 | conserved hypothetical protein                                                                   |            |
| CIMG_02660 | 1.46  | 0.00439  | 3.51   | 1.13E-11 | flavin-containing amine oxidasedehydrogenase                                                     |            |
| CIMG_02669 | 6.93  | 1.30E-27 | 6.90   | 6.64E-16 | conserved hypothetical protein                                                                   |            |
| CIMG_02674 | 2.66  | 1.42E-08 | 1.68   | 0.00414  | conserved hypothetical protein (Phosphotransferase enzyme family)                                | <b>*</b>   |
| CIMG_02682 | 2.63  | 8.34E-08 | 1.98   | 0.00166  | conserved hypothetical protein (K+ channel tetramerisation domain)                               |            |
| CIMG_02686 | 2.10  | 0.00044  | 1.85   | 0.02605  | conserved hypothetical protein                                                                   |            |
| CIMG_02687 | 1.94  | 0.00001  | 2.63   | 1.87E-07 | molecular chaperone (ABC1 family, ubiquinone biosynthesis protein coq-8)                         |            |
| CIMG_02688 | 3.41  | 2.17E-15 | 4.12   | 4.32E-15 | alpha-1,2-mannosyltransferase                                                                    | <b>*</b>   |
| CIMG_02697 | 1.72  | 0.00009  | 2.83   | 4.19E-08 | pre-rRNA processing protein                                                                      |            |
| CIMG_02700 | 1.40  | 0.03652  | 1.49   | 0.02898  | 40S ribosomal protein S9                                                                         |            |
| CIMG_02701 | 6.53  | 9.78E-15 | 9.92   | 2.26E-16 | conserved hypothetical protein                                                                   |            |
| CIMG_02706 | 2.19  | 6.81E-07 | 2.32   | 3.28E-06 | SET domain-containing protein                                                                    |            |
| CIMG_02711 | 2.21  | 5.42E-07 | 3.98   | 4.76E-19 | hydrolase                                                                                        |            |
| CIMG_02721 | 7.43  | 2.20E-30 | 3.64   | 2.35E-09 | conserved hypothetical protein                                                                   |            |
| CIMG_02793 | 1.44  | 0.03987  | 5.24   | 1.68E-20 | conserved hypothetical protein (GPR1/FUN34/yaaH family)                                          |            |
| CIMG_02797 | 1.74  | 0.00035  | 2.44   | 7.18E-08 | mitochondrial mRNA processing protein PET127                                                     |            |
| CIMG_02798 | 4.05  | 9.26E-16 | 4.76   | 1.17E-19 | leucine rich repeat protein                                                                      |            |
| CIMG_02801 | 1.83  | 0.00019  | 4.34   | 1.44E-18 | conserved hypothetical protein (alpha/beta hydrolase fold)                                       |            |
| CIMG_02804 | 4.55  | 6.42E-13 | 2.15   | 0.00091  | conserved hypothetical protein                                                                   | <b>G</b>   |

\*: Predicted secreted;

+: Gene under positive selection [19]; G: Gene gained in Coccidioides [19]

H, S: Up-regulated in Hyphae or Spherule by microarray [18]

**Table S2: All genes up-regulated in parasitic phase**

|            |       |          |        |          |                                                                              |     |
|------------|-------|----------|--------|----------|------------------------------------------------------------------------------|-----|
| CIMG_02805 | 3.77  | 1.99E-10 | 2.67   | 0.00080  | conserved hypothetical protein                                               |     |
| CIMG_02810 | 2.28  | 0.00001  | 1.53   | 0.02246  | conserved hypothetical protein                                               | *   |
| CIMG_02819 | 2.76  | 3.31E-08 | 2.36   | 4.32E-06 | conserved hypothetical protein                                               |     |
| CIMG_02830 | 2.67  | 1.96E-10 | 2.49   | 3.65E-10 | acyl-CoA dehydrogenase                                                       |     |
| CIMG_02831 | 2.56  | 7.25E-08 | 2.40   | 0.00002  | cwl1                                                                         |     |
| CIMG_02835 | 4.05  | 9.47E-07 | 9.83   | 5.14E-17 | conserved hypothetical protein                                               | *   |
| CIMG_02847 | 1.88  | 0.00014  | 1.74   | 0.00442  | conserved hypothetical protein                                               |     |
| CIMG_02866 | 1.74  | 0.00189  | 4.71   | 1.16E-11 | conserved hypothetical protein                                               |     |
| CIMG_02878 | 1.49  | 0.02147  | 3.98   | 9.24E-15 | conserved hypothetical protein                                               |     |
| CIMG_02885 | 1.98  | 1.16E-06 | 4.93   | 4.50E-18 | conserved hypothetical protein (putative oxidoreductase)                     |     |
| CIMG_02886 | 2.40  | 0.00006  | 10.16  | 2.20E-15 | conserved hypothetical protein                                               |     |
| CIMG_02887 | 1.38  | 0.01522  | 1.49   | 0.02658  | U3 small nucleolar ribonucleoprotein Lcp5                                    |     |
| CIMG_02923 | 2.89  | 9.01E-11 | 2.82   | 1.35E-08 | SET domain-containing protein                                                |     |
| CIMG_02985 | 4.18  | 3.26E-12 | 2.37   | 0.00003  | SUR2 (fatty acid hydroxylase superfamily)                                    |     |
| CIMG_02993 | 1.50  | 0.00995  | 1.67   | 0.00750  | ATP-dependent RNA helicase dbp6                                              |     |
| CIMG_03001 | 5.95  | 2.33E-26 | 9.51   | 1.12E-29 | sugar transporter hexose transporter                                         |     |
| CIMG_03002 | 5.56  | 9.78E-12 | 2.99   | 0.00091  | conserved hypothetical protein                                               |     |
| CIMG_03007 | 1.75  | 0.00010  | 1.58   | 0.02088  | protein kinase                                                               |     |
| CIMG_03011 | 4.79  | 1.60E-07 | 2.85   | 0.01251  | conserved hypothetical protein                                               |     |
| CIMG_03015 | 2.48  | 0.00014  | 1.64   | 0.01580  | conserved hypothetical protein                                               |     |
| CIMG_03018 | 1.53  | 0.01481  | 2.92   | 1.72E-06 | conserved hypothetical protein                                               |     |
| CIMG_03027 | 4.87  | 2.19E-18 | 9.07   | 4.40E-11 | conserved hypothetical protein (Phosphotransferase enzyme family)            |     |
| CIMG_03048 | 2.39  | 9.36E-09 | 1.78   | 0.00331  | GTP-binding protein GTR2                                                     |     |
| CIMG_03049 | 1.77  | 0.00028  | 1.85   | 0.00141  | heme/steroid binding domain-containing protein                               |     |
| CIMG_03055 | 2.34  | 0.00008  | 2.67   | 0.00007  | vacuolar protein sorting-associated protein Vps28                            |     |
| CIMG_03061 | 1.72  | 0.00007  | 192.69 | 2.68E-80 | conserved hypothetical protein                                               |     |
| CIMG_03067 | 2.22  | 8.76E-08 | 2.79   | 5.41E-08 | CHIP6 (glycosyltransferase family 28)                                        |     |
| CIMG_03077 | 5.72  | 2.95E-08 | 4.45   | 4.54E-07 | conserved hypothetical protein                                               |     |
| CIMG_03078 | 3.09  | 4.51E-07 | 6.33   | 1.81E-15 | conserved hypothetical protein                                               |     |
| CIMG_03083 | 9.13  | 2.63E-25 | 8.41   | 8.77E-29 | auxin efflux carrier superfamily                                             |     |
| CIMG_03084 | 2.50  | 0.00982  | 5.04   | 8.33E-06 | conserved hypothetical protein                                               |     |
| CIMG_03085 | 1.92  | 0.00165  | 2.89   | 3.50E-07 | conserved hypothetical protein                                               |     |
| CIMG_03098 | 5.17  | 6.26E-08 | 3.18   | 0.00011  | conserved hypothetical protein                                               |     |
| CIMG_03101 | 2.08  | 0.00017  | 1.92   | 0.00548  | conserved hypothetical protein                                               |     |
| CIMG_03103 | 2.26  | 3.10E-08 | 1.73   | 0.00915  | protein phosphatase 2c                                                       |     |
| CIMG_03110 | 2.52  | 1.24E-07 | 2.78   | 2.75E-07 | phosphatidylserine decarboxylase                                             |     |
| CIMG_03116 | 1.58  | 0.00148  | 1.79   | 0.00363  | conserved hypothetical protein                                               |     |
| CIMG_03119 | 1.95  | 0.04077  | 13.77  | 3.09E-21 | conserved hypothetical protein                                               |     |
| CIMG_03125 | 2.16  | 0.00018  | 3.63   | 4.66E-08 | conserved hypothetical protein                                               |     |
| CIMG_03131 | 2.79  | 7.64E-12 | 4.29   | 1.64E-15 | conserved hypothetical protein                                               |     |
| CIMG_03134 | 1.53  | 0.00228  | 6.71   | 1.27E-23 | succinate dehydrogenase subunit CybS                                         |     |
| CIMG_03135 | 2.00  | 0.00006  | 3.37   | 4.42E-10 | oxidoreductase                                                               |     |
| CIMG_03138 | 3.92  | 5.24E-12 | 8.93   | 2.21E-18 | nucleoside-diphosphate-sugar epimerase                                       |     |
| CIMG_03140 | 1.91  | 0.00929  | 5.73   | 4.24E-10 | conserved hypothetical protein (malate dehydrogenase)                        | * + |
| CIMG_03142 | 1.77  | 0.00391  | 2.60   | 0.00045  | alpha-                                                                       |     |
| CIMG_03144 | 1.73  | 0.01803  | 2.04   | 0.00217  | quinone oxidoreductase                                                       |     |
| CIMG_03149 | 3.16  | 0.00006  | 4.15   | 2.82E-06 | MFS multidrug transporter (benzoyl/methotrexate resistance protein)          |     |
| CIMG_03178 | 2.81  | 1.02E-10 | 2.68   | 2.12E-10 | conserved hypothetical protein                                               |     |
| CIMG_03179 | 3.86  | 2.52E-16 | 1.62   | 0.00047  | conserved hypothetical protein                                               |     |
| CIMG_03184 | 2.97  | 1.66E-08 | 2.24   | 0.00021  | conserved hypothetical protein (F-box domain)                                |     |
| CIMG_03186 | 1.66  | 0.00104  | 17.69  | 1.13E-44 | metalloreductase                                                             |     |
| CIMG_03188 | 2.06  | 8.10E-07 | 3.15   | 4.11E-10 | 2-deoxy-D-gluconate 3-dehydrogenase                                          |     |
| CIMG_03192 | 1.42  | 0.00524  | 2.75   | 5.25E-09 | zinc-dependent alcohol dehydrogenase                                         |     |
| CIMG_03193 | 1.46  | 0.01159  | 5.11   | 1.55E-18 | hydroxylisocaproate dehydrogenase                                            |     |
| CIMG_03197 | 3.60  | 7.40E-14 | 5.11   | 1.63E-20 | catechol dioxygenase                                                         |     |
| CIMG_03204 | 1.93  | 0.00001  | 1.69   | 0.00138  | UBX domain-containing protein                                                |     |
| CIMG_03207 | 2.49  | 9.11E-10 | 6.11   | 8.30E-23 | conserved hypothetical protein                                               |     |
| CIMG_03209 | 1.46  | 0.03158  | 2.08   | 0.00015  | homoserine O-acetyltransferase                                               |     |
| CIMG_03212 | 1.93  | 0.00919  | 12.31  | 1.03E-39 | conserved hypothetical protein                                               | +   |
| CIMG_03215 | 1.74  | 0.00032  | 2.29   | 0.00001  | UPF0586 protein                                                              |     |
| CIMG_03216 | 1.83  | 0.00066  | 2.11   | 0.00002  | conserved hypothetical protein                                               |     |
| CIMG_03221 | 1.73  | 0.00146  | 2.22   | 0.00003  | prefoldin subunit 4                                                          |     |
| CIMG_03222 | 3.10  | 2.68E-08 | 4.12   | 2.44E-18 | conserved hypothetical protein                                               |     |
| CIMG_03223 | 1.70  | 0.00142  | 1.63   | 5.86E-06 | heat shock protein CLPA                                                      |     |
| CIMG_03227 | 32.95 | 8.19E-35 | 5.05   | 2.99E-06 | conserved hypothetical protein                                               |     |
| CIMG_03233 | 2.14  | 2.64E-06 | 10.76  | 1.96E-30 | conserved hypothetical protein (Phosphotransferase enzyme family)            |     |
| CIMG_03242 | 1.34  | 0.04936  | 1.74   | 0.00167  | fibronectin type III domain-containing protein                               |     |
| CIMG_03250 | 4.64  | 0.00027  | 2.63   | 0.04461  | conserved hypothetical protein                                               |     |
| CIMG_03255 | 1.40  | 0.01947  | 2.89   | 9.67E-10 | C2H2 transcription factor                                                    |     |
| CIMG_03278 | 3.22  | 0.00010  | 3.66   | 7.46E-06 | conserved hypothetical protein                                               |     |
| CIMG_03281 | 2.14  | 0.00002  | 1.47   | 0.03000  | endosomal SPRY domain-containing protein                                     |     |
| CIMG_03282 | 2.32  | 4.28E-06 | 2.17   | 4.52E-06 | peptidase D                                                                  |     |
| CIMG_03283 | 5.30  | 3.83E-13 | 8.52   | 3.58E-26 | conserved hypothetical protein                                               |     |
| CIMG_03289 | 4.02  | 1.35E-12 | 1.50   | 0.03452  | conserved hypothetical protein (Fungal specific transcription factor domain) |     |
| CIMG_03300 | 4.36  | 0.00020  | 4.61   | 6.72E-08 | conserved hypothetical protein                                               |     |
| CIMG_03329 | 1.91  | 0.00003  | 3.19   | 2.23E-09 | JmjC domain-containing protein                                               |     |
| CIMG_03332 | 2.54  | 0.01355  | 4.65   | 0.00010  | conserved hypothetical protein                                               |     |
| CIMG_03342 | 1.47  | 0.02033  | 2.23   | 4.45E-06 | DUF614 domain-containing protein                                             |     |
| CIMG_03347 | 1.77  | 0.00134  | 1.58   | 0.04068  | hypothetical protein                                                         |     |
| CIMG_03352 | 3.95  | 2.84E-14 | 5.39   | 1.16E-14 | short chain dehydrogenase                                                    |     |

\*: Predicted secreted;

+: Gene under positive selection [19]; G: Gene gained in Coccidioides [19]

H, S: Up-regulated in Hyphae or Spherule by microarray [18]

**Table S2: All genes up-regulated in parasitic phase**

|            |       |          |       |          |                                                                                      |          |
|------------|-------|----------|-------|----------|--------------------------------------------------------------------------------------|----------|
| CIMG_03358 | 4.92  | 6.11E-13 | 2.88  | 8.91E-07 | F-box domain-containing protein                                                      | <b>G</b> |
| CIMG_03372 | 2.88  | 2.02E-11 | 1.63  | 0.01156  | conserved hypothetical protein (RING finger, C-x8-C-x5-C-x3-H type zinc finger)      |          |
| CIMG_03373 | 3.25  | 1.82E-10 | 4.39  | 1.10E-12 | conserved hypothetical protein (putative ATP adenyllyltransferase)                   |          |
| CIMG_03380 | 3.20  | 1.20E-13 | 2.72  | 3.12E-10 | snoRNP assembly factor Naf1                                                          |          |
| CIMG_03383 | 1.63  | 0.00703  | 3.12  | 2.51E-14 | C2H2 transcription factor                                                            |          |
| CIMG_03396 | 1.94  | 0.00002  | 1.73  | 0.00090  | WD repeat protein                                                                    |          |
| CIMG_03401 | 3.38  | 7.39E-14 | 3.41  | 1.68E-09 | cell division protein kinase                                                         |          |
| CIMG_03413 | 2.98  | 4.42E-13 | 8.86  | 1.05E-29 | TBC domain-containing protein                                                        |          |
| CIMG_03426 | 2.33  | 4.32E-06 | 7.87  | 3.84E-19 | conserved hypothetical protein (DUF1799)                                             |          |
| CIMG_03427 | 1.58  | 0.00280  | 1.83  | 0.00074  | sensor histidine kinase/response regulator                                           |          |
| CIMG_03428 | 2.50  | 1.03E-10 | 7.45  | 4.03E-23 | allantoicase Alc                                                                     |          |
| CIMG_03429 | 3.14  | 5.80E-14 | 9.86  | 1.09E-29 | cytochrome b561                                                                      |          |
| CIMG_03430 | 1.36  | 0.02990  | 1.85  | 0.00025  | seryl-tRNA synthetase                                                                |          |
| CIMG_03449 | 1.68  | 0.00050  | 4.68  | 6.75E-07 | conserved hypothetical protein                                                       |          |
| CIMG_03458 | 6.95  | 3.54E-15 | 3.75  | 1.38E-08 | conserved hypothetical protein                                                       |          |
| CIMG_03460 | 2.44  | 3.64E-08 | 2.56  | 3.66E-06 | mitochondrial chaperone BCS1                                                         |          |
| CIMG_03465 | 4.47  | 1.06E-21 | 3.05  | 1.85E-06 | conserved hypothetical protein                                                       |          |
| CIMG_03467 | 1.31  | 0.04069  | 2.47  | 1.15E-06 | conserved hypothetical protein                                                       |          |
| CIMG_03470 | 4.23  | 2.89E-10 | 2.15  | 0.00161  | conserved hypothetical protein                                                       |          |
| CIMG_03477 | 2.45  | 0.00017  | 2.66  | 0.00025  | hypothetical protein                                                                 |          |
| CIMG_03510 | 1.77  | 0.00022  | 1.56  | 0.01542  | conserved hypothetical protein                                                       |          |
| CIMG_03520 | 1.41  | 0.03878  | 3.43  | 1.67E-08 | pathogenesis associated protein Cap20                                                |          |
| CIMG_03524 | 3.48  | 1.08E-08 | 2.75  | 5.91E-06 | CAIB/BAIF family enzyme                                                              |          |
| CIMG_03547 | 2.53  | 4.15E-10 | 2.77  | 5.66E-09 | phosphoglycerate mutase family domain-containing protein                             |          |
| CIMG_03548 | 1.76  | 0.00019  | 1.90  | 0.00030  | conserved hypothetical protein (Dor1-like family)                                    |          |
| CIMG_03551 | 3.66  | 2.46E-13 | 4.04  | 8.34E-10 | conserved hypothetical protein                                                       |          |
| CIMG_03569 | 8.71  | 9.80E-11 | 9.43  | 1.26E-12 | conserved hypothetical protein                                                       | *        |
| CIMG_03575 | 1.70  | 0.00044  | 2.03  | 0.00021  | conserved hypothetical protein (Putative adipose-regulatory protein (Seipin))        |          |
| CIMG_03594 | 2.15  | 2.73E-07 | 1.56  | 0.02933  | esterase                                                                             |          |
| CIMG_03609 | 1.37  | 0.03453  | 2.04  | 0.00110  | DNA damage response protein                                                          |          |
| CIMG_03612 | 1.71  | 0.00007  | 16.92 | 3.55E-47 | conserved hypothetical protein                                                       |          |
| CIMG_03613 | 2.11  | 2.99E-06 | 1.50  | 0.02832  | PQ loop repeat protein                                                               |          |
| CIMG_03614 | 2.24  | 0.00002  | 7.31  | 1.61E-23 | conserved hypothetical protein (Putative stress-responsive nuclear envelope protein) | *        |
| CIMG_03617 | 3.05  | 0.00001  | 6.15  | 3.95E-11 | hypothetical protein                                                                 | *        |
| CIMG_03621 | 2.19  | 3.66E-06 | 2.51  | 2.25E-07 | conserved hypothetical protein                                                       |          |
| CIMG_03627 | 1.45  | 0.01261  | 1.97  | 0.01467  | transcription initiation factor IIB                                                  |          |
| CIMG_03630 | 2.67  | 1.42E-10 | 3.38  | 1.49E-11 | conserved hypothetical protein                                                       |          |
| CIMG_03636 | 1.47  | 0.03235  | 1.84  | 0.00040  | conserved hypothetical protein (putative acetyltransferase)                          |          |
| CIMG_03664 | 1.78  | 0.00570  | 4.33  | 1.37E-09 | phosphotransferase enzyme family protein                                             |          |
| CIMG_03668 | 2.70  | 0.00233  | 8.51  | 2.25E-08 | conserved hypothetical protein                                                       |          |
| CIMG_03674 | 5.17  | 2.99E-13 | 27.89 | 2.65E-40 | conserved hypothetical protein                                                       |          |
| CIMG_03676 | 3.38  | 5.12E-07 | 2.61  | 0.00118  | conserved hypothetical protein                                                       |          |
| CIMG_03677 | 1.52  | 0.00857  | 1.63  | 0.01963  | mitochondrial methylglutaconyl-CoA hydratase                                         |          |
| CIMG_03691 | 2.54  | 0.00006  | 4.30  | 6.75E-06 | conserved hypothetical protein                                                       |          |
| CIMG_03702 | 2.83  | 6.06E-10 | 3.88  | 4.63E-16 | BAG domain-containing protein                                                        |          |
| CIMG_03706 | 1.55  | 0.01491  | 1.58  | 0.04194  | conserved hypothetical protein (putative chalcone-flavanone isomerase)               |          |
| CIMG_03707 | 1.39  | 0.04834  | 3.42  | 1.96E-09 | conserved hypothetical protein                                                       |          |
| CIMG_03717 | 1.37  | 0.03255  | 2.02  | 0.00017  | RNA polymerase II mediator complex subunit Soh1                                      |          |
| CIMG_03730 | 2.09  | 0.00088  | 7.94  | 1.15E-23 | hypothetical protein                                                                 |          |
| CIMG_03743 | 4.40  | 0.00002  | 3.02  | 0.00002  | conserved hypothetical protein                                                       |          |
| CIMG_03755 | 3.62  | 1.14E-16 | 7.26  | 4.25E-26 | phosphoketolase                                                                      |          |
| CIMG_03756 | 2.77  | 1.63E-12 | 8.07  | 2.03E-26 | acetate kinase                                                                       |          |
| CIMG_03758 | 2.68  | 0.00025  | 2.07  | 0.03685  | conserved hypothetical protein                                                       |          |
| CIMG_03760 | 1.43  | 0.01592  | 3.13  | 1.01E-10 | conserved hypothetical protein                                                       |          |
| CIMG_03762 | 1.51  | 0.01728  | 3.43  | 2.61E-11 | conserved hypothetical protein                                                       |          |
| CIMG_03764 | 7.12  | 1.34E-06 | 4.80  | 0.00001  | conserved hypothetical protein                                                       |          |
| CIMG_03766 | 3.54  | 8.20E-09 | 2.18  | 0.00079  | ferric-chelate reductase                                                             | *        |
| CIMG_03770 | 1.50  | 0.00660  | 2.05  | 7.02E-06 | ATP-dependent RNA helicase DBP8                                                      |          |
| CIMG_03771 | 3.84  | 0.00038  | 1.84  | 0.03124  | conserved hypothetical protein                                                       |          |
| CIMG_03781 | 10.31 | 1.83E-35 | 5.22  | 4.26E-11 | conserved hypothetical protein                                                       |          |
| CIMG_03789 | 4.43  | 1.09E-09 | 18.08 | 1.31E-26 | pyruvate decarboxylase                                                               |          |
| CIMG_03790 | 2.33  | 5.93E-09 | 5.20  | 3.66E-21 | THUMP domain-containing protein                                                      |          |
| CIMG_03796 | 3.82  | 0.00125  | 2.55  | 0.01065  | conserved hypothetical protein                                                       |          |
| CIMG_03802 | 2.75  | 1.53E-09 | 2.87  | 2.39E-09 | glutamate decarboxylase                                                              |          |
| CIMG_03803 | 1.81  | 0.00010  | 1.89  | 0.00033  | RINT-1 family protein                                                                |          |
| CIMG_03804 | 1.83  | 0.00177  | 2.30  | 0.00024  | DNA ligase I                                                                         |          |
| CIMG_03805 | 6.65  | 3.01E-10 | 62.25 | 8.62E-41 | macrophage binding protein                                                           |          |
| CIMG_03817 | 1.81  | 0.00021  | 1.88  | 0.00304  | vacuolar assembly protein                                                            |          |
| CIMG_03819 | 5.78  | 1.38E-18 | 9.00  | 2.77E-21 | conserved hypothetical protein                                                       |          |
| CIMG_03822 | 3.08  | 4.25E-10 | 2.88  | 3.89E-08 | chitinase 7                                                                          | <b>S</b> |
| CIMG_03842 | 2.58  | 0.00003  | 2.69  | 0.00003  | conserved hypothetical protein                                                       |          |
| CIMG_03856 | 2.24  | 3.01E-07 | 1.41  | 0.04420  | RNA polymerase II mediator complex protein Nut2                                      |          |
| CIMG_03860 | 8.19  | 5.54E-18 | 11.35 | 1.29E-20 | conserved hypothetical protein                                                       |          |
| CIMG_03862 | 9.08  | 3.95E-19 | 3.38  | 1.33E-08 | conserved hypothetical protein                                                       |          |
| CIMG_03877 | 1.60  | 0.00358  | 2.21  | 0.00002  | NADH-ubiquinone oxidoreductase 11.5kD subunit                                        |          |
| CIMG_03880 | 2.95  | 8.35E-09 | 19.02 | 2.35E-38 | erythromycin esterase                                                                |          |
| CIMG_03881 | 6.88  | 7.21E-26 | 10.74 | 5.27E-32 | conserved hypothetical protein                                                       |          |

\*: Predicted secreted;

+: Gene under positive selection [19]; G: Gene gained in Coccidioides [19]

H, S: Up-regulated in Hyphae or Spherule by microarray [18]

**Table S2: All genes up-regulated in parasitic phase**

|            |       |          |       |          |                                                                                  |   |
|------------|-------|----------|-------|----------|----------------------------------------------------------------------------------|---|
| CIMG_03882 | 1.99  | 4.54E-06 | 1.90  | 0.00009  | inositol phospholipid biosynthesis protein Scs3                                  |   |
| CIMG_03886 | 1.43  | 0.03275  | 2.16  | 0.00019  | conserved hypothetical protein                                                   |   |
| CIMG_03895 | 3.12  | 4.00E-08 | 2.51  | 0.00186  | tRNA-specific adenosine deaminase                                                |   |
| CIMG_03896 | 1.55  | 0.00524  | 1.63  | 0.00468  | splicing factor 3B, subunit 10 (SF3b10)                                          |   |
| CIMG_03897 | 1.51  | 0.00520  | 5.92  | 3.88E-20 | conserved hypothetical protein (putative phage head-tail adaptor)                |   |
| CIMG_03899 | 2.65  | 0.00109  | 5.96  | 0.00005  | conserved hypothetical protein                                                   |   |
| CIMG_03901 | 1.40  | 0.03777  | 3.73  | 6.34E-13 | conserved hypothetical protein (putative oestrogen-responsive protein Fam102A-B) |   |
| CIMG_03907 | 4.26  | 4.86E-19 | 1.53  | 0.02514  | glycosyl transferase family 8 protein                                            |   |
| CIMG_03909 | 4.92  | 6.32E-23 | 5.54  | 4.74E-21 | alpha/beta hydrolase                                                             | * |
| CIMG_03914 | 2.74  | 0.00014  | 6.34  | 5.58E-09 | conserved hypothetical protein                                                   |   |
| CIMG_03938 | 2.61  | 0.00122  | 5.37  | 4.38E-08 | conserved hypothetical protein                                                   |   |
| CIMG_03948 | 1.39  | 0.02175  | 1.81  | 0.00032  | TBC domain-containing protein                                                    |   |
| CIMG_03952 | 1.42  | 0.01474  | 2.09  | 0.00016  | Phospholipid:diacylglycerol acyltransferase                                      |   |
| CIMG_03956 | 18.84 | 7.28E-24 | 2.40  | 4.44E-07 | carboxylic acid transporter                                                      |   |
| CIMG_03959 | 2.42  | 3.18E-06 | 7.54  | 3.62E-12 | conserved hypothetical protein                                                   |   |
| CIMG_03960 | 2.50  | 1.14E-07 | 3.30  | 7.11E-10 | conserved hypothetical protein                                                   |   |
| CIMG_03961 | 2.86  | 7.84E-12 | 1.60  | 0.01914  | cAMP-dependent protein kinase regulatory subunit                                 |   |
| CIMG_03962 | 2.26  | 1.34E-07 | 1.52  | 0.01587  | conserved hypothetical protein                                                   |   |
| CIMG_03969 | 2.52  | 5.11E-09 | 2.47  | 6.13E-07 | conserved hypothetical protein                                                   |   |
| CIMG_03971 | 4.56  | 1.39E-09 | 4.24  | 7.85E-06 | conserved hypothetical protein                                                   |   |
| CIMG_03990 | 5.34  | 4.97E-08 | 4.60  | 0.00002  | conserved hypothetical protein                                                   |   |
| CIMG_03992 | 2.82  | 0.04836  | 4.28  | 3.39E-06 | conserved hypothetical protein                                                   | * |
| CIMG_03996 | 1.42  | 0.00897  | 6.22  | 7.70E-24 | NADH-ubiquinone oxidoreductase 23 kDa subunit                                    |   |
| CIMG_03998 | 1.57  | 0.00362  | 2.96  | 1.16E-09 | vacuolar protein sorting-associated protein 74                                   |   |
| CIMG_03999 | 1.61  | 0.00048  | 3.33  | 1.28E-11 | conserved hypothetical protein                                                   |   |
| CIMG_04007 | 1.55  | 0.00329  | 1.54  | 0.01738  | RLI and DUF367 domain-containing protein                                         |   |
| CIMG_04016 | 1.83  | 0.00007  | 3.67  | 4.42E-14 | aconitate hydratase                                                              |   |
| CIMG_04019 | 1.38  | 0.01155  | 3.64  | 1.43E-14 | vacuolar membrane PQ loop repeat protein                                         |   |
| CIMG_04020 | 3.46  | 0.00038  | 3.96  | 0.00049  | conserved hypothetical protein                                                   | G |
| CIMG_04040 | 1.85  | 0.02480  | 3.33  | 0.00065  | conserved hypothetical protein                                                   |   |
| CIMG_04053 | 4.71  | 2.71E-18 | 4.73  | 7.54E-12 | conserved hypothetical protein                                                   |   |
| CIMG_04055 | 1.48  | 0.01083  | 3.38  | 4.02E-10 | conserved hypothetical protein                                                   |   |
| CIMG_04068 | 3.26  | 0.00026  | 3.68  | 0.00236  | conserved hypothetical protein                                                   |   |
| CIMG_04085 | 2.32  | 1.93E-08 | 2.96  | 1.15E-11 | conserved hypothetical protein                                                   |   |
| CIMG_04092 | 1.61  | 0.00171  | 2.46  | 6.13E-07 | conserved hypothetical protein                                                   |   |
| CIMG_04096 | 11.10 | 5.43E-35 | 14.73 | 5.13E-43 | conserved hypothetical protein                                                   |   |
| CIMG_04100 | 1.47  | 0.01315  | 2.24  | 3.26E-07 | conserved hypothetical protein                                                   |   |
| CIMG_04136 | 1.79  | 0.01460  | 2.35  | 0.00117  | conserved hypothetical protein                                                   |   |
| CIMG_04137 | 2.66  | 1.64E-10 | 3.94  | 2.83E-14 | tyrosine phosphatase                                                             |   |
| CIMG_04150 | 2.20  | 0.00008  | 2.21  | 0.00004  | conserved hypothetical protein                                                   |   |
| CIMG_04172 | 2.35  | 0.00001  | 1.93  | 0.00013  | bZIP transcription factor                                                        |   |
| CIMG_04183 | 1.67  | 0.00022  | 4.24  | 3.71E-18 | longevity-assurance protein                                                      |   |
| CIMG_04192 | 1.49  | 0.03451  | 1.72  | 0.02507  | conserved hypothetical protein                                                   |   |
| CIMG_04215 | 3.24  | 3.68E-10 | 1.69  | 0.01559  | conserved hypothetical protein                                                   |   |
| CIMG_04228 | 1.58  | 0.00464  | 2.14  | 0.00043  | cytochrome oxidase assembly                                                      |   |
| CIMG_04236 | 1.59  | 0.00088  | 2.94  | 7.10E-10 | conserved hypothetical protein                                                   |   |
| CIMG_04240 | 1.73  | 0.00034  | 1.99  | 0.00068  | conserved hypothetical protein (Sedlin N-terminal conserved region)              |   |
| CIMG_04267 | 2.64  | 2.77E-10 | 1.46  | 0.02417  | conserved hypothetical protein                                                   |   |
| CIMG_04306 | 1.46  | 0.03136  | 1.76  | 0.00393  | nucleic acid-binding protein                                                     |   |
| CIMG_04316 | 2.76  | 2.38E-10 | 2.68  | 9.37E-09 | conserved hypothetical protein                                                   |   |
| CIMG_04331 | 4.53  | 2.77E-14 | 29.86 | 3.20E-48 | conserved hypothetical protein                                                   |   |
| CIMG_04336 | 5.75  | 5.04E-09 | 5.52  | 1.26E-15 | catalase                                                                         |   |
| CIMG_04337 | 3.86  | 1.41E-06 | 6.45  | 1.27E-12 | conserved hypothetical protein                                                   |   |
| CIMG_04344 | 3.94  | 4.51E-16 | 1.80  | 0.00140  | uricase                                                                          |   |
| CIMG_04347 | 2.19  | 2.05E-07 | 2.89  | 8.52E-09 | AAR2 family protein                                                              |   |
| CIMG_04349 | 1.53  | 0.00633  | 2.43  | 5.25E-07 | prephenate dehydrogenase                                                         |   |
| CIMG_04350 | 2.70  | 0.00039  | 7.13  | 1.37E-08 | conserved hypothetical protein                                                   |   |
| CIMG_04351 | 9.46  | 1.79E-31 | 30.67 | 5.22E-52 | cellobiose dehydrogenase                                                         | * |
| CIMG_04354 | 1.62  | 0.00357  | 2.08  | 0.00056  | iron-sulfur cluster assembly 2                                                   |   |
| CIMG_04355 | 8.65  | 1.81E-15 | 20.07 | 1.40E-33 | HHE domain-containing protein                                                    |   |
| CIMG_04356 | 5.11  | 3.02E-24 | 10.94 | 1.98E-37 | metallo-beta-lactamase superfamily protein                                       |   |
| CIMG_04362 | 1.82  | 0.00003  | 1.55  | 0.00321  | DUF408 domain-containing protein                                                 |   |
| CIMG_04367 | 4.04  | 3.47E-18 | 3.22  | 6.09E-12 | conserved hypothetical protein (Methyltransferase domain)                        | G |
| CIMG_04370 | 2.56  | 2.61E-07 | 11.09 | 7.49E-27 | conserved hypothetical protein                                                   |   |
| CIMG_04373 | 2.38  | 2.89E-09 | 1.52  | 0.04283  | glycerol dehydrogenase                                                           |   |
| CIMG_04384 | 1.78  | 0.00043  | 1.70  | 0.00864  | topoisomerase TRF4                                                               |   |
| CIMG_04389 | 2.05  | 1.92E-06 | 1.49  | 0.01718  | DUF602 domain-containing protein                                                 |   |
| CIMG_04394 | 1.82  | 0.00104  | 2.41  | 0.00011  | conserved hypothetical protein (DUF2458)                                         |   |
| CIMG_04396 | 3.40  | 0.00002  | 8.26  | 4.49E-09 | conserved hypothetical protein                                                   |   |
| CIMG_04409 | 2.64  | 2.94E-08 | 3.95  | 4.30E-11 | conserved hypothetical protein                                                   |   |
| CIMG_04411 | 2.88  | 2.90E-10 | 5.47  | 5.47E-17 | glucosamine-6-phosphate deaminase                                                |   |
| CIMG_04427 | 2.43  | 2.55E-09 | 4.55  | 5.01E-17 | conserved hypothetical protein                                                   | * |
| CIMG_04428 | 1.35  | 0.04561  | 1.89  | 0.00167  | conserved hypothetical protein                                                   |   |
| CIMG_04431 | 3.00  | 7.39E-08 | 4.12  | 5.56E-12 | actin cytoskeleton protein                                                       |   |
| CIMG_04434 | 2.39  | 3.06E-08 | 2.31  | 3.20E-06 | antiviral helicase SKI2                                                          |   |
| CIMG_04435 | 2.03  | 3.48E-06 | 2.03  | 0.00006  | conserved hypothetical protein (DUF2415)                                         |   |
| CIMG_04439 | 4.34  | 3.03E-07 | 6.63  | 7.98E-17 | conserved hypothetical protein                                                   |   |
| CIMG_04448 | 4.13  | 4.10E-10 | 2.44  | 0.00672  | conserved hypothetical protein                                                   |   |
| CIMG_04457 | 2.04  | 0.00002  | 3.07  | 1.70E-06 | C6 transcription factor                                                          |   |

\*: Predicted secreted;

+: Gene under positive selection [19]; G: Gene gained in Coccidioides [19]

H, S: Up-regulated in Hyphae or Spherule by microarray [18]



**Table S2: All genes up-regulated in parasitic phase**

|            |       |          |        |          |                                                                                         |     |
|------------|-------|----------|--------|----------|-----------------------------------------------------------------------------------------|-----|
| CIMG_04459 | 1.31  | 0.04138  | 2.98   | 6.68E-10 | MFS transporter Fmp42                                                                   |     |
| CIMG_04465 | 1.87  | 0.00005  | 2.10   | 0.00002  | UTP-glucose-1-phosphate uridylyltransferase                                             |     |
| CIMG_04472 | 2.65  | 0.00516  | 3.01   | 0.00040  | conserved hypothetical protein                                                          |     |
| CIMG_04496 | 1.49  | 0.01533  | 2.14   | 0.00074  | IMP dehydrogenase                                                                       |     |
| CIMG_04503 | 3.69  | 0.00002  | 4.38   | 8.44E-07 | conserved hypothetical protein                                                          |     |
| CIMG_04504 | 2.82  | 0.01562  | 2.46   | 0.02402  | conserved hypothetical protein                                                          | *   |
| CIMG_04513 | 2.88  | 0.00131  | 2.79   | 0.01077  | conserved hypothetical protein                                                          |     |
| CIMG_04519 | 2.28  | 0.00002  | 1.52   | 0.02887  | conserved hypothetical protein                                                          |     |
| CIMG_04523 | 1.53  | 0.00792  | 2.16   | 0.00003  | C6 transcription factor                                                                 |     |
| CIMG_04526 | 1.45  | 0.02192  | 1.50   | 0.04093  | import inner membrane translocase subunit tim-50                                        |     |
| CIMG_04531 | 5.28  | 5.51E-16 | 3.35   | 5.42E-06 | polarized growth protein                                                                |     |
| CIMG_04532 | 7.79  | 5.81E-07 | 2.90   | 0.02002  | conserved hypothetical protein                                                          |     |
| CIMG_04534 | 1.66  | 0.00074  | 2.13   | 0.00008  | conserved hypothetical protein                                                          |     |
| CIMG_04536 | 2.22  | 0.00004  | 3.92   | 1.89E-09 | conserved hypothetical protein (Mitochondrial ATPase inhibitor, IATP)                   |     |
| CIMG_04544 | 1.72  | 0.00123  | 2.14   | 0.00004  | alpha-amylase AmyA                                                                      | * S |
| CIMG_04545 | 2.73  | 5.04E-08 | 2.85   | 1.22E-07 | bax Inhibitor family protein                                                            |     |
| CIMG_04550 | 4.53  | 8.20E-11 | 116.10 | 4.32E-68 | conserved hypothetical protein                                                          |     |
| CIMG_04551 | 2.08  | 2.76E-07 | 140.87 | 3.25E-73 | conserved hypothetical protein (putative conidiation protein 6)                         |     |
| CIMG_04552 | 1.76  | 0.00616  | 2.35   | 0.00102  | conserved hypothetical protein                                                          |     |
| CIMG_04558 | 1.40  | 0.01056  | 3.32   | 7.38E-06 | proline oxidase PrnD                                                                    |     |
| CIMG_04561 | 2.65  | 0.00010  | 2.69   | 0.00113  | hypothetical protein                                                                    |     |
| CIMG_04574 | 2.47  | 4.77E-07 | 3.59   | 3.06E-10 | conserved hypothetical protein                                                          | G   |
| CIMG_04575 | 2.98  | 2.67E-06 | 3.48   | 0.00023  | MYB DNA-binding domain-containing protein                                               |     |
| CIMG_04576 | 1.65  | 0.00860  | 1.98   | 0.00059  | cytochrome c oxidase polypeptide IV                                                     |     |
| CIMG_04583 | 4.52  | 4.26E-12 | 2.72   | 0.00002  | conserved hypothetical protein                                                          |     |
| CIMG_04587 | 6.23  | 4.50E-06 | 3.14   | 0.00541  | conserved hypothetical protein                                                          |     |
| CIMG_04588 | 7.02  | 2.48E-24 | 4.62   | 1.60E-14 | aldo-keto reductase                                                                     |     |
| CIMG_04590 | 1.56  | 0.00206  | 1.88   | 0.00039  | dual specificity phosphatase                                                            |     |
| CIMG_04591 | 1.40  | 0.00890  | 3.36   | 1.48E-11 | dihydroxyacid dehydratase Ilv3                                                          |     |
| CIMG_04592 | 2.68  | 3.57E-07 | 12.12  | 1.86E-27 | conserved hypothetical protein (DUF1772)                                                |     |
| CIMG_04610 | 3.59  | 2.25E-13 | 1.95   | 0.00089  | conserved hypothetical protein (Fungal Zn(2)-Cys(6) binuclear cluster domain)           |     |
| CIMG_04613 | 10.92 | 5.51E-12 | 26.33  | 3.03E-50 | hypothetical protein                                                                    | *   |
| CIMG_04624 | 1.57  | 0.00236  | 1.78   | 0.00058  | prefoldin subunit 2                                                                     |     |
| CIMG_04634 | 1.68  | 0.00023  | 2.76   | 7.73E-09 | DNA-directed RNA polymerase I and III polypeptide                                       |     |
| CIMG_04635 | 2.04  | 3.71E-06 | 1.63   | 0.01830  | NEDD8 activating enzyme                                                                 |     |
| CIMG_04661 | 5.54  | 4.15E-21 | 4.82   | 9.10E-18 | conserved hypothetical protein (Fungal Zn(2)-Cys(6) binuclear cluster domain)           |     |
| CIMG_04662 | 9.70  | 4.93E-18 | 28.77  | 9.55E-41 | magnesium-translocating P-type ATPase                                                   | S   |
| CIMG_04663 | 1.44  | 0.02072  | 4.67   | 5.75E-18 | acetyltransferase                                                                       |     |
| CIMG_04673 | 1.72  | 0.00170  | 2.79   | 1.03E-07 | 8-oxoguanine DNA glycosylase                                                            |     |
| CIMG_04678 | 9.38  | 7.24E-15 | 8.47   | 4.99E-07 | conserved hypothetical protein (Fatty acid hydroxylase superfamily)                     |     |
| CIMG_04680 | 10.16 | 2.69E-18 | 5.49   | 4.24E-14 | conserved hypothetical protein                                                          |     |
| CIMG_04682 | 12.64 | 7.10E-15 | 4.43   | 2.76E-08 | conserved hypothetical protein (DUF1857)                                                | G   |
| CIMG_04683 | 11.48 | 2.92E-18 | 20.81  | 1.80E-23 | O-methyltransferase                                                                     |     |
| CIMG_04684 | 8.29  | 2.27E-22 | 17.52  | 1.81E-30 | pyridoxal reductase                                                                     |     |
| CIMG_04685 | 3.23  | 9.83E-09 | 3.01   | 1.37E-08 | conserved hypothetical protein (O-methyltransferase)                                    |     |
| CIMG_04687 | 2.63  | 2.98E-08 | 4.19   | 8.40E-11 | conserved hypothetical protein (Myb-like DNA-binding domain)                            |     |
| CIMG_04691 | 2.23  | 2.67E-07 | 1.45   | 0.02941  | chromate ion transporter                                                                |     |
| CIMG_04695 | 1.37  | 0.03475  | 1.82   | 0.00033  | conserved hypothetical protein (Dpy-30 motif)                                           |     |
| CIMG_04710 | 2.71  | 1.69E-08 | 2.04   | 0.00013  | conserved hypothetical protein                                                          |     |
| CIMG_04717 | 3.50  | 1.24E-15 | 2.50   | 1.21E-07 | silencing information regulator (Sir2 family)                                           |     |
| CIMG_04723 | 1.80  | 0.04049  | 2.57   | 0.01304  | conserved hypothetical protein                                                          |     |
| CIMG_04726 | 1.50  | 0.01033  | 1.88   | 0.00092  | conserved hypothetical protein (Helix-loop-helix DNA-binding domain)                    |     |
| CIMG_04731 | 2.99  | 3.78E-10 | 12.06  | 1.18E-37 | aspartyl-tRNA synthetase                                                                |     |
| CIMG_04732 | 1.49  | 0.01771  | 48.62  | 1.40E-61 | HHE domain-containing protein                                                           |     |
| CIMG_04739 | 3.00  | 7.87E-12 | 4.10   | 1.41E-17 | conserved hypothetical protein                                                          |     |
| CIMG_04740 | 18.35 | 1.99E-48 | 16.54  | 5.75E-32 | conserved hypothetical protein                                                          |     |
| CIMG_04744 | 1.69  | 0.00045  | 1.79   | 0.00155  | conserved hypothetical protein (Fungal family of unknown function (DUF1776))            | S   |
| CIMG_04753 | 2.41  | 2.31E-06 | 1.88   | 0.00002  | conserved hypothetical protein                                                          |     |
| CIMG_04756 | 2.36  | 1.09E-06 | 6.49   | 4.41E-16 | Y20 protein                                                                             |     |
| CIMG_04757 | 1.55  | 0.02437  | 12.23  | 9.46E-16 | conserved hypothetical protein (CVNH domain)                                            |     |
| CIMG_04761 | 1.72  | 0.01277  | 1.93   | 0.01388  | chitinase 5                                                                             | +   |
| CIMG_04763 | 2.01  | 0.00251  | 1.97   | 0.01167  | conserved hypothetical protein                                                          |     |
| CIMG_04765 | 3.06  | 5.06E-10 | 38.38  | 5.73E-54 | integral membrane protein                                                               |     |
| CIMG_04768 | 1.63  | 0.00122  | 1.57   | 0.01174  | conserved hypothetical protein (Mediator complex protein)                               |     |
| CIMG_04801 | 1.67  | 0.00027  | 2.89   | 1.36E-09 | conserved hypothetical protein (Protein of unknown function (DUF2414))                  |     |
| CIMG_04819 | 4.49  | 5.44E-17 | 5.26   | 2.75E-19 | conserved hypothetical protein (Vta1-like)                                              |     |
| CIMG_04858 | 2.55  | 0.00011  | 2.31   | 0.01419  | conserved hypothetical protein (putative ochratoxin A non-ribosomal peptide synthetase) |     |
| CIMG_04862 | 6.02  | 8.87E-24 | 1.84   | 0.00326  | cytochrome P450 monooxygenase                                                           |     |
| CIMG_04863 | 2.83  | 1.42E-09 | 2.91   | 6.70E-07 | conserved hypothetical protein (MFS transporter, Tat pathway signal sequence)           |     |
| CIMG_04864 | 2.00  | 0.00160  | 2.22   | 0.00009  | flavoprotein subunit P-cresol methylhydroxylase                                         |     |
| CIMG_04869 | 2.14  | 0.01499  | 3.59   | 0.00002  | conserved hypothetical protein                                                          |     |
| CIMG_04877 | 2.42  | 0.00102  | 2.87   | 0.00836  | conserved hypothetical protein                                                          |     |
| CIMG_04891 | 2.17  | 7.00E-07 | 2.11   | 0.00002  | sulfate permease II                                                                     |     |
| CIMG_04897 | 2.79  | 1.76E-09 | 2.70   | 1.30E-06 | patatin-like phospholipase domain-containing protein                                    |     |
| CIMG_04912 | 1.58  | 0.00117  | 1.48   | 0.01579  | translocon protein Sec61beta                                                            |     |

\*: Predicted secreted;

+: Gene under positive selection [19]; G: Gene gained in Coccidioides [19]

H, S: Up-regulated in Hyphae or Spherule by microarray [18]

**Table S2: All genes up-regulated in parasitic phase**

|            |       |          |       |          |                                                                                                                            |          |
|------------|-------|----------|-------|----------|----------------------------------------------------------------------------------------------------------------------------|----------|
| CIMG_04916 | 1.80  | 0.00305  | 3.00  | 3.39E-07 | conserved hypothetical protein                                                                                             |          |
| CIMG_04925 | 1.78  | 0.00573  | 3.88  | 4.20E-09 | conserved hypothetical protein (YDG/SRA domain)                                                                            |          |
| CIMG_04927 | 2.66  | 4.70E-10 | 3.06  | 7.98E-09 | Sin3 complex subunit (SIN3 protein-binding protein STB2)                                                                   |          |
| CIMG_04933 | 2.45  | 0.00160  | 4.84  | 0.00019  | conserved hypothetical protein                                                                                             |          |
| CIMG_04935 | 1.60  | 0.00408  | 2.38  | 0.00002  | urease                                                                                                                     |          |
| CIMG_04936 | 2.92  | 2.15E-11 | 3.79  | 1.04E-10 | DNA repair protein                                                                                                         |          |
| CIMG_04938 | 2.30  | 1.20E-08 | 2.05  | 0.00022  | conserved hypothetical protein                                                                                             |          |
| CIMG_04950 | 2.53  | 5.29E-07 | 2.30  | 4.34E-06 | conserved hypothetical protein                                                                                             |          |
| CIMG_04952 | 1.66  | 0.00197  | 1.66  | 0.04320  | conserved hypothetical protein                                                                                             |          |
| CIMG_04955 | 2.02  | 0.00001  | 1.68  | 0.00940  | conserved hypothetical protein (FMC1 protein family)                                                                       |          |
| CIMG_04956 | 2.61  | 1.09E-08 | 2.08  | 0.00019  | HIT finger domain-containing protein                                                                                       |          |
| CIMG_04961 | 6.21  | 1.44E-13 | 2.51  | 0.00014  | conserved hypothetical protein                                                                                             | <b>G</b> |
| CIMG_04979 | 3.26  | 3.01E-14 | 1.64  | 0.00739  | Ser/Thr protein phosphatase                                                                                                |          |
| CIMG_04984 | 1.56  | 0.04574  | 2.64  | 0.00007  | hypothetical protein                                                                                                       |          |
| CIMG_04986 | 2.42  | 0.00396  | 2.55  | 0.00312  | conserved hypothetical protein                                                                                             |          |
| CIMG_05000 | 1.73  | 0.00056  | 1.78  | 0.00391  | TBC domain-containing protein                                                                                              |          |
| CIMG_05004 | 8.81  | 1.58E-21 | 9.52  | 8.78E-25 | conserved hypothetical protein                                                                                             | <b>G</b> |
| CIMG_05010 | 2.71  | 0.01686  | 5.18  | 0.00017  | conserved hypothetical protein                                                                                             |          |
| CIMG_05013 | 2.47  | 2.85E-09 | 1.85  | 0.00122  | conserved hypothetical protein (pentatricopeptide repeat domain)                                                           |          |
| CIMG_05037 | 3.80  | 1.20E-12 | 2.01  | 0.00022  | conserved hypothetical protein                                                                                             | <b>*</b> |
| CIMG_05043 | 1.94  | 0.00001  | 1.51  | 0.02618  | phosphatidylinositol 4-kinase type II subunit alpha                                                                        |          |
| CIMG_05052 | 4.90  | 1.35E-21 | 2.77  | 3.80E-07 | mitochondrial pyruvate dehydrogenase kinase                                                                                |          |
| CIMG_05071 | 5.44  | 1.38E-18 | 21.93 | 8.67E-40 | conserved hypothetical protein                                                                                             |          |
| CIMG_05072 | 2.45  | 0.00039  | 1.76  | 0.02565  | hypothetical protein                                                                                                       |          |
| CIMG_05078 | 2.61  | 3.92E-10 | 2.18  | 2.67E-06 | extracellular serine-rich protein                                                                                          | <b>*</b> |
| CIMG_05085 | 1.72  | 0.00048  | 4.00  | 2.00E-15 | DRAP deaminase                                                                                                             |          |
| CIMG_05086 | 1.76  | 0.01280  | 3.52  | 2.99E-09 | conserved hypothetical protein                                                                                             |          |
| CIMG_05095 | 1.93  | 0.00004  | 3.49  | 3.55E-10 | conserved hypothetical protein                                                                                             |          |
| CIMG_05107 | 2.75  | 9.55E-11 | 2.56  | 1.03E-08 | calcineurin binding protein                                                                                                |          |
| CIMG_05109 | 5.20  | 7.59E-19 | 2.71  | 0.00005  | conserved hypothetical protein                                                                                             |          |
| CIMG_05116 | 1.78  | 0.00017  | 2.43  | 2.15E-06 | phenylalanyl-tRNA synthetase, alpha subunit                                                                                |          |
| CIMG_05122 | 2.00  | 0.00001  | 2.23  | 0.00003  | conserved hypothetical protein (PAPA-1-like conserved region)                                                              |          |
| CIMG_05123 | 1.46  | 0.00877  | 1.49  | 0.00842  | conserved hypothetical protein                                                                                             |          |
| CIMG_05163 | 2.19  | 4.78E-07 | 2.03  | 0.00009  | conserved hypothetical protein                                                                                             |          |
| CIMG_05172 | 11.66 | 2.61E-38 | 2.60  | 0.00004  | conserved hypothetical protein (Ankyrin repeat)                                                                            |          |
| CIMG_05174 | 1.93  | 0.00002  | 1.48  | 0.04517  | NADPH-adrenodoxin reductase Arh1                                                                                           |          |
| CIMG_05193 | 3.46  | 0.00087  | 5.91  | 8.13E-08 | conserved hypothetical protein                                                                                             |          |
| CIMG_05209 | 3.24  | 1.33E-13 | 2.47  | 6.99E-07 | hydroxymethylglutaryl-CoA lyase                                                                                            |          |
| CIMG_05218 | 1.48  | 0.01017  | 1.66  | 0.00687  | mitochondrion organization and biogenesis protein                                                                          |          |
| CIMG_05221 | 1.68  | 0.00098  | 1.75  | 0.00135  | conserved hypothetical protein                                                                                             |          |
| CIMG_05229 | 1.69  | 0.00100  | 1.70  | 0.02547  | mitochondrial cytochrome c oxidase assembly factor Cox11p                                                                  |          |
| CIMG_05235 | 19.55 | 2.44E-44 | 35.45 | 2.80E-52 | conserved hypothetical protein                                                                                             |          |
| CIMG_05241 | 4.02  | 4.12E-11 | 2.80  | 4.86E-07 | conserved hypothetical protein                                                                                             |          |
| CIMG_05247 | 4.41  | 3.05E-16 | 9.33  | 8.28E-27 | conserved hypothetical protein                                                                                             |          |
| CIMG_05252 | 2.24  | 8.07E-07 | 3.12  | 4.84E-09 | glycosyl transferase                                                                                                       |          |
| CIMG_05255 | 6.32  | 5.37E-10 | 3.12  | 0.00015  | conserved hypothetical protein                                                                                             |          |
| CIMG_05269 | 1.90  | 0.00003  | 2.15  | 0.00010  | kinase activator                                                                                                           |          |
| CIMG_05271 | 2.33  | 1.15E-06 | 3.55  | 4.45E-11 | sulfur metabolite repression control protein                                                                               |          |
| CIMG_05278 | 1.70  | 0.00029  | 1.95  | 0.00200  | conserved hypothetical protein                                                                                             |          |
| CIMG_05288 | 2.38  | 0.00001  | 2.09  | 0.00087  | conserved hypothetical protein                                                                                             |          |
| CIMG_05377 | 6.64  | 1.84E-15 | 18.02 | 1.01E-28 | protein phosphatase regulatory subunit Gac1                                                                                |          |
| CIMG_05392 | 1.58  | 0.00175  | 1.49  | 0.02040  | conserved hypothetical protein (U3 snoRNA associated)                                                                      |          |
| CIMG_05394 | 2.05  | 0.00012  | 2.40  | 6.83E-06 | Sad1-interacting factor 2                                                                                                  |          |
| CIMG_05402 | 1.81  | 0.00054  | 2.04  | 0.00144  | conserved hypothetical protein (DUF917, Hydantoinase/oxoprolinase N-terminal region)                                       |          |
| CIMG_05406 | 1.76  | 0.00021  | 1.71  | 0.00849  | dual specificity phosphatase                                                                                               |          |
| CIMG_05409 | 1.97  | 3.49E-06 | 2.17  | 4.67E-06 | exocyst complex protein exo70                                                                                              |          |
| CIMG_05415 | 1.64  | 0.00043  | 1.55  | 0.00480  | conserved hypothetical protein                                                                                             |          |
| CIMG_05419 | 3.70  | 6.43E-09 | 2.54  | 0.00054  | conserved hypothetical protein                                                                                             |          |
| CIMG_05424 | 2.76  | 2.29E-08 | 3.41  | 4.97E-11 | conserved hypothetical protein                                                                                             |          |
| CIMG_05442 | 2.28  | 1.81E-08 | 3.25  | 4.58E-12 | phosphoglycerate mutase                                                                                                    |          |
| CIMG_05452 | 1.53  | 0.01764  | 1.89  | 0.00179  | phosphoric ester hydrolase                                                                                                 |          |
| CIMG_05460 | 1.76  | 0.00254  | 4.97  | 1.13E-14 | conserved hypothetical protein                                                                                             |          |
| CIMG_05471 | 3.07  | 1.16E-07 | 3.57  | 4.71E-08 | conserved hypothetical protein                                                                                             |          |
| CIMG_05475 | 2.74  | 2.21E-10 | 3.61  | 6.23E-14 | DUF1275 domain-containing protein                                                                                          | <b>+</b> |
| CIMG_05484 | 2.67  | 6.74E-09 | 1.59  | 0.01284  | sorting nexin-41                                                                                                           |          |
| CIMG_05485 | 5.01  | 5.30E-16 | 3.74  | 3.39E-08 | conserved hypothetical protein                                                                                             |          |
| CIMG_05489 | 1.72  | 0.00087  | 1.57  | 0.02287  | protein kinase                                                                                                             |          |
| CIMG_05492 | 2.47  | 6.21E-08 | 2.84  | 2.52E-09 | dihydroxy acid dehydratase Iiv3                                                                                            |          |
| CIMG_05501 | 5.23  | 4.11E-17 | 3.61  | 7.35E-08 | benzoate 4-monoxygenase cytochrome P450                                                                                    |          |
| CIMG_05503 | 7.96  | 7.05E-15 | 3.55  | 1.59E-06 | conserved hypothetical protein (alpha/beta hydrolase fold)                                                                 |          |
| CIMG_05510 | 2.02  | 0.00004  | 1.70  | 0.01797  | conserved hypothetical protein (Ankyrin repeat)                                                                            |          |
| CIMG_05516 | 4.02  | 1.52E-08 | 2.04  | 0.00401  | CCCH zinc finger domain-containing protein                                                                                 |          |
| CIMG_05519 | 2.22  | 0.00004  | 2.00  | 0.00896  | conserved hypothetical protein (Fungal Zn(2)-Cys(6) binuclear cluster domain, Fungal specific transcription factor domain) |          |
| CIMG_05526 | 2.11  | 5.71E-07 | 1.57  | 0.00447  | conserved hypothetical protein                                                                                             |          |
| CIMG_05530 | 2.47  | 0.00018  | 3.07  | 0.00015  | conserved hypothetical protein                                                                                             |          |
| CIMG_05533 | 1.75  | 0.00132  | 2.02  | 0.00084  | regulatory protein suaprga1                                                                                                |          |
| CIMG_05539 | 2.68  | 0.00002  | 1.84  | 0.00244  | protein kinase domain-containing protein                                                                                   |          |
| CIMG_05542 | 1.78  | 0.00044  | 1.87  | 0.00663  | hexose carrier protein (MFS transporter)                                                                                   |          |

\*: Predicted secreted;

+: Gene under positive selection [19]; G: Gene gained in Coccidioides [19]

H, S: Up-regulated in Hyphae or Spherule by microarray [18]

**Table S2: All genes up-regulated in parasitic phase**

|            |      |          |       |          |                                                                             |   |
|------------|------|----------|-------|----------|-----------------------------------------------------------------------------|---|
| CIMG_05543 | 3.96 | 3.35E-06 | 2.08  | 0.00916  | conserved hypothetical protein                                              |   |
| CIMG_05545 | 3.38 | 0.00001  | 7.53  | 5.00E-08 | conserved hypothetical protein                                              |   |
| CIMG_05549 | 1.91 | 0.00002  | 2.90  | 5.64E-09 | metallo-beta-lactamase superfamily protein                                  |   |
| CIMG_05552 | 2.91 | 4.32E-11 | 1.71  | 0.03153  | transmembrane protein UsgS                                                  |   |
| CIMG_05564 | 5.89 | 7.31E-13 | 3.32  | 3.91E-08 | conserved hypothetical protein                                              |   |
| CIMG_05575 | 5.05 | 0.00012  | 4.04  | 0.00041  | conserved hypothetical protein                                              |   |
| CIMG_05584 | 4.70 | 2.39E-11 | 2.08  | 0.00399  | conserved hypothetical protein                                              |   |
| CIMG_05585 | 5.60 | 8.30E-22 | 3.93  | 1.17E-10 | conserved hypothetical protein (carbonic anhydrase 2)                       | * |
| CIMG_05588 | 2.16 | 5.50E-07 | 2.78  | 2.55E-08 | conserved hypothetical protein                                              |   |
| CIMG_05595 | 2.22 | 7.03E-07 | 1.88  | 0.00143  | ubiquinone biosynthesis protein Coq7                                        |   |
| CIMG_05608 | 1.76 | 0.00154  | 5.43  | 6.41E-10 | conserved hypothetical protein                                              |   |
| CIMG_05609 | 1.43 | 0.01255  | 1.90  | 0.00012  | mitochondrial large ribosomal subunit                                       |   |
| CIMG_05615 | 2.06 | 0.00005  | 2.40  | 2.96E-06 | conserved hypothetical protein (Major facilitator superfamily)              |   |
| CIMG_05617 | 1.77 | 0.00147  | 2.00  | 0.00017  | phosphoglycerate mutase                                                     | * |
| CIMG_05622 | 1.69 | 0.00015  | 21.08 | 1.99E-51 | conserved hypothetical protein (DUF2503)                                    | * |
| CIMG_05627 | 1.32 | 0.03190  | 8.86  | 1.54E-24 | conserved hypothetical protein                                              |   |
| CIMG_05629 | 1.73 | 0.00039  | 1.60  | 0.02288  | conserved hypothetical protein (FHA domain)                                 |   |
| CIMG_05631 | 2.50 | 0.00229  | 10.77 | 1.73E-13 | conserved hypothetical protein                                              |   |
| CIMG_05651 | 2.63 | 2.62E-06 | 3.41  | 3.20E-07 | conserved hypothetical protein                                              |   |
| CIMG_05653 | 1.94 | 0.00001  | 5.68  | 4.05E-20 | syntaxin 5                                                                  |   |
| CIMG_05654 | 2.98 | 1.00E-08 | 2.48  | 0.00005  | conserved hypothetical protein                                              |   |
| CIMG_05660 | 4.03 | 2.50E-14 | 3.34  | 2.54E-09 | protein kinase                                                              |   |
| CIMG_05695 | 3.66 | 3.05E-07 | 2.42  | 0.00272  | conserved hypothetical protein                                              |   |
| CIMG_05723 | 1.49 | 0.00950  | 1.70  | 0.00103  | conserved hypothetical protein (Phosphotransferase enzyme family)           |   |
| CIMG_05727 | 2.20 | 6.21E-08 | 2.15  | 2.27E-08 | farnesyltransferase alpha subunit                                           |   |
| CIMG_05729 | 2.04 | 9.84E-07 | 2.20  | 0.00010  | methionyl-tRNA synthetase                                                   |   |
| CIMG_05730 | 2.44 | 1.26E-09 | 1.76  | 0.00126  | nuclear transport factor 2 domain-containing protein                        |   |
| CIMG_05736 | 1.89 | 0.02360  | 2.33  | 0.01552  | metalloproteinase 6                                                         |   |
| CIMG_05745 | 6.71 | 1.36E-17 | 4.60  | 1.96E-13 | conserved hypothetical protein (cytoplasm protein)                          |   |
| CIMG_05749 | 2.80 | 0.00007  | 2.66  | 0.00003  | conserved hypothetical protein                                              |   |
| CIMG_05752 | 1.76 | 0.01887  | 2.34  | 0.00523  | conserved hypothetical protein (ankyrin repeat domain-containing protein 1) |   |
| CIMG_05758 | 9.83 | 8.21E-20 | 38.01 | 3.01E-52 | parasitic phase-specific protein PSP-1                                      |   |
| CIMG_05759 | 3.42 | 1.87E-11 | 6.36  | 1.74E-16 | FAD dependent sulfhydryl oxidase Erv2                                       |   |
| CIMG_05760 | 1.91 | 0.00106  | 1.62  | 0.00476  | conserved hypothetical protein                                              |   |
| CIMG_05769 | 2.00 | 0.03113  | 1.88  | 0.04734  | siderophore iron transporter                                                |   |
| CIMG_05793 | 1.92 | 0.00001  | 1.60  | 0.00988  | mitochondrial inner membrane magnesium transporter mrs2                     |   |
| CIMG_05803 | 2.26 | 1.10E-06 | 3.08  | 1.44E-08 | conserved hypothetical protein (Phospholipase/Carboxylesterase)             |   |
| CIMG_05810 | 6.10 | 3.52E-13 | 6.58  | 1.56E-16 | proteasome subunit beta type-9                                              |   |
| CIMG_05824 | 2.48 | 3.96E-09 | 2.31  | 6.08E-08 | peptidyl-prolyl cis-trans isomerase-like 1                                  |   |
| CIMG_05827 | 2.10 | 7.07E-07 | 2.43  | 1.76E-06 | ribonuclease P complex subunit Pop1                                         |   |
| CIMG_05834 | 1.46 | 0.03312  | 1.93  | 0.00121  | conserved hypothetical protein (phosphotransferase enzyme family)           |   |
| CIMG_05852 | 1.85 | 0.00004  | 7.35  | 2.05E-25 | fascilin domain-containing protein                                          | * |
| CIMG_05853 | 1.73 | 0.00324  | 2.86  | 1.24E-06 | serine/threonine protein kinase                                             | S |
| CIMG_05873 | 1.77 | 0.00018  | 1.98  | 0.00061  | esterase                                                                    |   |
| CIMG_05884 | 1.81 | 0.00742  | 1.71  | 0.01065  | rRNA processing protein Ipi1                                                |   |
| CIMG_05892 | 7.08 | 4.50E-24 | 14.40 | 2.88E-45 | conserved hypothetical protein (Methyltransferase domain)                   |   |
| CIMG_05893 | 2.89 | 0.00014  | 2.76  | 0.00289  | conserved hypothetical protein                                              |   |
| CIMG_05898 | 2.53 | 3.56E-10 | 1.44  | 0.03904  | aldo/keto reductase                                                         |   |
| CIMG_05899 | 3.43 | 5.86E-14 | 2.28  | 5.23E-06 | sulfite transporter Ssu1                                                    |   |
| CIMG_05904 | 3.10 | 4.78E-10 | 2.42  | 0.00004  | conserved hypothetical protein                                              |   |
| CIMG_05914 | 3.87 | 7.48E-14 | 4.22  | 7.16E-10 | conserved hypothetical protein                                              |   |
| CIMG_05915 | 1.43 | 0.01569  | 1.65  | 0.00220  | mitogen-activated protein kinase HOG1                                       | S |
| CIMG_05918 | 1.64 | 0.00061  | 3.35  | 4.54E-11 | cupin domain-containing protein                                             | G |
| CIMG_05920 | 2.69 | 2.83E-11 | 3.11  | 2.52E-11 | conserved hypothetical protein (DUF2342)                                    |   |
| CIMG_05961 | 4.58 | 2.44E-09 | 5.46  | 3.69E-10 | hypothetical protein                                                        |   |
| CIMG_05973 | 5.12 | 5.22E-15 | 4.37  | 3.53E-13 | conserved hypothetical protein (Swi5)                                       |   |
| CIMG_05987 | 1.44 | 0.01466  | 2.56  | 2.67E-07 | DnaJ domain-containing protein Psi                                          |   |
| CIMG_05995 | 1.72 | 0.00009  | 3.41  | 4.55E-13 | 4-aminobutyrate aminotransferase                                            |   |
| CIMG_05996 | 4.11 | 0.00017  | 3.39  | 0.00010  | conserved hypothetical protein                                              |   |
| CIMG_06007 | 1.41 | 0.02679  | 2.28  | 0.00001  | filamentation protein                                                       |   |
| CIMG_06009 | 2.89 | 0.00004  | 2.03  | 0.02305  | low-temperature viability protein ltv1                                      |   |
| CIMG_06011 | 2.35 | 0.00001  | 2.15  | 0.00002  | C2H2 type zinc finger domain-containing protein                             |   |
| CIMG_06039 | 2.85 | 4.05E-08 | 23.97 | 4.38E-44 | conserved hypothetical protein                                              |   |
| CIMG_06040 | 5.62 | 3.31E-21 | 8.00  | 3.81E-20 | BAR domain-containing protein                                               |   |
| CIMG_06048 | 1.89 | 0.00001  | 1.49  | 0.01610  | conserved hypothetical protein                                              |   |
| CIMG_06053 | 5.55 | 3.65E-08 | 10.51 | 4.66E-28 | alcohol dehydrogenase I                                                     |   |
| CIMG_06054 | 1.63 | 0.00290  | 1.65  | 0.00646  | SNF2 family helicase/ATPase                                                 |   |
| CIMG_06062 | 1.33 | 0.04058  | 2.75  | 2.52E-06 | DUF500 domain-containing protein                                            |   |
| CIMG_06064 | 1.43 | 0.01923  | 3.77  | 1.74E-12 | NADPH-dependent FMN/FAD containing oxidoreductase                           |   |
| CIMG_06068 | 5.63 | 1.41E-22 | 2.02  | 8.14E-06 | DUF300 domain-containing protein                                            |   |
| CIMG_06073 | 4.56 | 1.97E-11 | 2.54  | 6.11E-06 | metalloproteinase 10                                                        | * |
| CIMG_06074 | 3.83 | 1.20E-07 | 3.64  | 0.00001  | conserved hypothetical protein                                              |   |
| CIMG_06075 | 2.97 | 1.48E-12 | 3.21  | 9.16E-13 | conserved hypothetical protein                                              |   |
| CIMG_06080 | 1.46 | 0.00890  | 3.47  | 1.95E-11 | elongation factor G                                                         |   |
| CIMG_06088 | 3.94 | 2.58E-13 | 1.87  | 0.00050  | cystathionine beta-synthase                                                 |   |
| CIMG_06090 | 2.58 | 0.00189  | 2.91  | 0.00076  | conserved hypothetical protein                                              |   |
| CIMG_06104 | 2.68 | 7.01E-11 | 1.81  | 0.00044  | conserved hypothetical protein                                              |   |
| CIMG_06118 | 5.04 | 1.57E-22 | 4.55  | 2.03E-19 | conserved hypothetical protein                                              |   |
| CIMG_06120 | 1.61 | 0.00174  | 2.63  | 1.60E-06 | conserved hypothetical protein                                              | * |

\*: Predicted secreted;

+: Gene under positive selection [19]; G: Gene gained in Coccidioides [19]

H, S: Up-regulated in Hyphae or Spherule by microarray [18]

**Table S2: All genes up-regulated in parasitic phase**

|            |       |          |       |          |                                                                                       |          |
|------------|-------|----------|-------|----------|---------------------------------------------------------------------------------------|----------|
| CIMG_06121 | 2.95  | 1.23E-12 | 2.56  | 5.89E-07 | conserved hypothetical protein                                                        |          |
| CIMG_06122 | 1.54  | 0.00174  | 2.70  | 4.16E-07 | AMP-binding enzyme                                                                    |          |
| CIMG_06124 | 2.81  | 0.00747  | 4.85  | 0.00006  | conserved hypothetical protein                                                        |          |
| CIMG_06131 | 4.10  | 1.61E-09 | 5.78  | 7.10E-10 | conserved hypothetical protein                                                        | <b>G</b> |
| CIMG_06132 | 2.04  | 2.45E-06 | 2.15  | 0.00002  | SH3 domain signaling protein                                                          |          |
| CIMG_06138 | 2.42  | 1.21E-08 | 1.62  | 0.00350  | Ku70                                                                                  |          |
| CIMG_06140 | 2.10  | 5.05E-07 | 1.79  | 0.00184  | pre-mRNA-splicing factor cwc24                                                        |          |
| CIMG_06144 | 1.93  | 0.02491  | 7.55  | 5.18E-07 | hypothetical protein                                                                  |          |
| CIMG_06146 | 2.22  | 2.63E-07 | 3.58  | 1.37E-12 | ferrochelatase                                                                        |          |
| CIMG_06147 | 2.29  | 1.16E-07 | 2.91  | 1.37E-09 | conserved hypothetical protein (pentatricopeptide repeat domain)                      |          |
| CIMG_06175 | 7.49  | 8.50E-14 | 10.35 | 4.55E-11 | conserved hypothetical protein                                                        |          |
| CIMG_06176 | 2.14  | 0.00004  | 2.51  | 1.19E-06 | N-terminal asparagine amidohydrolase                                                  |          |
| CIMG_06182 | 1.69  | 0.00404  | 2.30  | 0.00072  | phospholipase D                                                                       | *        |
| CIMG_06194 | 2.96  | 4.47E-07 | 2.21  | 0.00198  | conserved hypothetical protein (Glutathione-dependent formaldehyde-activating enzyme) |          |
| CIMG_06198 | 5.15  | 1.61E-22 | 4.89  | 2.99E-15 | conserved hypothetical protein                                                        |          |
| CIMG_06203 | 4.50  | 1.20E-19 | 3.55  | 2.52E-11 | conserved hypothetical protein (F-box domain)                                         |          |
| CIMG_06217 | 1.68  | 0.00058  | 2.60  | 2.14E-07 | TRAPP complex subunit                                                                 |          |
| CIMG_06218 | 2.60  | 9.25E-08 | 2.16  | 0.00122  | serine/threonine protein kinase                                                       |          |
| CIMG_06228 | 1.59  | 0.00160  | 2.01  | 0.00038  | poly(p)/ATP NAD kinase                                                                |          |
| CIMG_06232 | 2.81  | 0.00001  | 1.70  | 0.03874  | conserved hypothetical protein                                                        |          |
| CIMG_06239 | 1.73  | 0.00012  | 2.50  | 6.44E-07 | calcium channel subunit Mid1                                                          | *        |
| CIMG_06242 | 4.95  | 2.07E-13 | 4.80  | 2.52E-07 | conserved hypothetical protein                                                        |          |
| CIMG_06246 | 1.48  | 0.00984  | 1.68  | 0.00392  | 1,3-beta-glucan biosynthesis protein                                                  |          |
| CIMG_06250 | 3.79  | 1.13E-09 | 2.79  | 3.80E-07 | conserved hypothetical protein                                                        | *        |
| CIMG_06258 | 1.89  | 0.02104  | 2.76  | 0.00349  | conserved hypothetical protein                                                        |          |
| CIMG_06261 | 4.81  | 8.03E-09 | 2.59  | 0.00112  | conserved hypothetical protein                                                        |          |
| CIMG_06262 | 22.25 | 1.54E-27 | 2.95  | 5.45E-06 | conserved hypothetical protein                                                        |          |
| CIMG_06263 | 3.18  | 0.00005  | 16.28 | 8.11E-32 | conserved hypothetical protein                                                        |          |
| CIMG_06271 | 4.51  | 8.69E-19 | 1.62  | 0.01851  | conserved hypothetical protein (Chromatin organisation modifier (chromo) domain)      |          |
| CIMG_06275 | 2.20  | 2.85E-07 | 1.98  | 0.00135  | glycogen branching enzyme                                                             |          |
| CIMG_06290 | 3.67  | 0.00001  | 3.01  | 0.00150  | conserved hypothetical protein                                                        |          |
| CIMG_06294 | 1.61  | 0.01424  | 2.55  | 2.52E-06 | citrate synthase                                                                      |          |
| CIMG_06297 | 2.11  | 5.83E-07 | 1.73  | 0.00291  | DNA-directed RNA polymerase III subunit rpc3                                          |          |
| CIMG_06322 | 2.38  | 1.34E-06 | 1.45  | 0.04058  | conserved hypothetical protein (alpha/beta hydrolase fold)                            | *        |
| CIMG_06327 | 1.98  | 0.00001  | 1.92  | 0.00022  | conserved hypothetical protein                                                        |          |
| CIMG_06333 | 2.32  | 4.64E-06 | 1.87  | 0.00324  | conserved hypothetical protein                                                        |          |
| CIMG_06340 | 1.40  | 0.03495  | 1.65  | 0.04492  | RNase3 domain-containing protein                                                      |          |
| CIMG_06357 | 2.04  | 0.00904  | 2.41  | 0.00760  | conserved hypothetical protein                                                        |          |
| CIMG_06363 | 1.81  | 0.00056  | 2.06  | 0.00003  | hemoglobin and proliferation regulated protein                                        |          |
| CIMG_06364 | 1.54  | 0.01566  | 2.41  | 9.11E-07 | DUF1671 domain-containing protein (peptidase family C78)                              |          |
| CIMG_06371 | 2.30  | 3.90E-08 | 3.30  | 1.09E-10 | conserved hypothetical protein                                                        |          |
| CIMG_06377 | 1.41  | 0.03907  | 1.53  | 0.01658  | FYV10                                                                                 |          |
| CIMG_06378 | 3.74  | 7.85E-10 | 7.54  | 4.05E-20 | UPF0617 protein                                                                       |          |
| CIMG_06384 | 3.12  | 0.00005  | 2.20  | 0.02696  | conserved hypothetical protein                                                        |          |
| CIMG_06390 | 3.72  | 0.00003  | 4.34  | 0.00002  | conserved hypothetical protein                                                        |          |
| CIMG_06395 | 3.00  | 2.09E-10 | 4.31  | 2.43E-12 | Ser/Thr protein phosphatase                                                           |          |
| CIMG_06399 | 2.61  | 3.61E-10 | 2.07  | 0.00004  | heat shock transcription factor                                                       |          |
| CIMG_06404 | 2.29  | 0.00031  | 3.05  | 2.44E-07 | glyceraldehyde-3-phosphate dehydrogenase                                              |          |
| CIMG_06417 | 4.74  | 1.77E-22 | 8.62  | 3.27E-25 | conserved hypothetical protein                                                        |          |
| CIMG_06424 | 1.39  | 0.04520  | 2.07  | 0.00020  | D-lactate dehydrogenase 2                                                             |          |
| CIMG_06427 | 1.89  | 0.00001  | 4.44  | 3.32E-18 | sulfite oxidase                                                                       |          |
| CIMG_06434 | 2.30  | 0.00182  | 5.21  | 4.57E-06 | conserved hypothetical protein                                                        | *        |
| CIMG_06441 | 3.26  | 0.00277  | 3.68  | 0.00502  | conserved hypothetical protein                                                        | *        |
| CIMG_06442 | 1.60  | 0.00117  | 1.42  | 0.02710  | NAD dependent epimerase/dehydratase                                                   |          |
| CIMG_06445 | 4.56  | 4.98E-20 | 6.48  | 4.39E-23 | potassium ion transporter                                                             |          |
| CIMG_06449 | 1.57  | 0.00137  | 1.92  | 0.00185  | WD domain-containing protein                                                          |          |
| CIMG_06478 | 2.14  | 8.26E-07 | 2.21  | 6.18E-06 | amino acid permease                                                                   |          |
| CIMG_06483 | 5.09  | 1.54E-21 | 2.36  | 6.88E-07 | conserved hypothetical protein                                                        |          |
| CIMG_06484 | 3.78  | 1.15E-14 | 2.83  | 7.86E-09 | glyoxylate reductase                                                                  |          |
| CIMG_06492 | 3.91  | 1.56E-06 | 11.32 | 1.42E-15 | conserved hypothetical protein                                                        |          |
| CIMG_06493 | 5.56  | 1.07E-08 | 4.78  | 1.10E-06 | conserved hypothetical protein                                                        |          |
| CIMG_06497 | 2.12  | 0.00098  | 2.29  | 0.00003  | conserved hypothetical protein                                                        |          |
| CIMG_06500 | 1.66  | 0.00144  | 1.72  | 0.00246  | impact family protein                                                                 |          |
| CIMG_06513 | 8.34  | 9.01E-11 | 3.94  | 2.84E-06 | conserved hypothetical protein                                                        |          |
| CIMG_06517 | 3.50  | 1.34E-10 | 8.57  | 9.74E-30 | conserved hypothetical protein                                                        |          |
| CIMG_06519 | 1.56  | 0.00098  | 3.97  | 1.95E-10 | conserved hypothetical protein                                                        |          |
| CIMG_06520 | 6.90  | 4.14E-16 | 3.12  | 2.31E-07 | conserved hypothetical protein                                                        |          |
| CIMG_06523 | 1.73  | 0.00018  | 2.05  | 0.00008  | conserved hypothetical protein                                                        |          |
| CIMG_06528 | 2.54  | 5.45E-08 | 2.14  | 0.00004  | conserved hypothetical protein                                                        | *        |
| CIMG_06534 | 3.28  | 0.00009  | 5.48  | 1.20E-09 | conserved hypothetical protein                                                        | *        |
| CIMG_06539 | 2.50  | 2.12E-09 | 2.09  | 0.00006  | pyruvate dehydrogenase kinase                                                         |          |
| CIMG_06542 | 2.83  | 1.36E-08 | 12.44 | 2.77E-27 | conserved hypothetical protein (Uncharacterized protein family UPF0057)               | *        |
| CIMG_06544 | 1.69  | 0.00038  | 1.71  | 0.02055  | Ulp1 protease                                                                         |          |
| CIMG_06547 | 2.94  | 0.00002  | 4.69  | 4.21E-10 | conserved hypothetical protein (putative aminotransferase)                            |          |
| CIMG_06552 | 2.82  | 2.23E-07 | 2.95  | 6.57E-07 | conserved hypothetical protein                                                        |          |
| CIMG_06559 | 1.59  | 0.00457  | 1.76  | 0.00274  | carboxyvinyl-carboxyphosphonate phosphorylmutase                                      |          |
| CIMG_06577 | 1.74  | 0.00012  | 2.78  | 4.19E-09 | conserved hypothetical protein                                                        |          |
| CIMG_06589 | 1.78  | 0.00456  | 1.65  | 0.01650  | conserved hypothetical protein (CHP02453)                                             |          |

\*: Predicted secreted;

+: Gene under positive selection [19]; G: Gene gained in Coccidioides [19]

H, S: Up-regulated in Hyphae or Spherule by microarray [18]

**Table S2: All genes up-regulated in parasitic phase**

|            |       |          |       |          |                                                                                                                            |            |
|------------|-------|----------|-------|----------|----------------------------------------------------------------------------------------------------------------------------|------------|
| CIMG_06594 | 3.29  | 1.39E-15 | 7.23  | 8.56E-23 | oxidoreductase                                                                                                             |            |
| CIMG_06596 | 1.42  | 0.01083  | 2.04  | 0.00073  | alkaline phosphatase                                                                                                       |            |
| CIMG_06600 | 1.65  | 0.00057  | 1.49  | 0.01606  | conserved hypothetical protein (mitochondrial fusion and transporter Ugo1)                                                 |            |
| CIMG_06609 | 2.83  | 1.84E-10 | 12.36 | 4.57E-29 | cupin 2 domain-containing protein                                                                                          |            |
| CIMG_06612 | 1.58  | 0.00750  | 2.48  | 1.46E-06 | ankyrin repeat protein                                                                                                     |            |
| CIMG_06617 | 1.41  | 0.01159  | 3.90  | 4.17E-16 | succinate dehydrogenase cytochrome b560 subunit                                                                            |            |
| CIMG_06638 | 1.85  | 0.00002  | 1.71  | 0.00411  | conserved hypothetical protein (Nin one binding (NOB1) Zn-ribbon like)                                                     |            |
| CIMG_06642 | 1.43  | 0.02998  | 1.79  | 0.00088  | conserved hypothetical protein                                                                                             | <b>G *</b> |
| CIMG_06643 | 2.40  | 7.00E-09 | 1.89  | 0.00098  | scramblase                                                                                                                 |            |
| CIMG_06645 | 2.17  | 0.00248  | 2.35  | 0.00350  | meiotic recombination protein spo11                                                                                        |            |
| CIMG_06646 | 1.83  | 0.00002  | 1.51  | 0.02120  | oxidosqualene:lanosterol cyclase                                                                                           |            |
| CIMG_06648 | 2.29  | 2.15E-08 | 1.93  | 0.02394  | PQ loop repeat protein                                                                                                     |            |
| CIMG_06651 | 1.52  | 0.00856  | 2.24  | 0.00001  | tRNA methyltransferase complex GCD14 subunit                                                                               |            |
| CIMG_06653 | 4.26  | 1.30E-10 | 1.94  | 0.00324  | conserved hypothetical protein                                                                                             |            |
| CIMG_06659 | 3.08  | 2.71E-11 | 2.18  | 0.00024  | MFS multidrug transporter                                                                                                  |            |
| CIMG_06669 | 2.02  | 4.06E-06 | 3.36  | 1.07E-09 | phospholipase/Carboxylesterase superfamily                                                                                 |            |
| CIMG_06683 | 2.59  | 8.29E-08 | 10.84 | 2.66E-22 | DUF1479 domain-containing protein                                                                                          |            |
| CIMG_06687 | 3.19  | 0.00001  | 3.47  | 0.00057  | conserved hypothetical protein                                                                                             |            |
| CIMG_06688 | 2.16  | 6.72E-07 | 3.18  | 7.05E-11 | ubiquitin conjugating enzyme                                                                                               |            |
| CIMG_06694 | 2.03  | 0.00190  | 2.43  | 0.00005  | DEAD box helicase                                                                                                          |            |
| CIMG_06705 | 4.37  | 3.99E-18 | 9.62  | 1.95E-23 | conserved hypothetical protein                                                                                             |            |
| CIMG_06707 | 2.94  | 8.98E-08 | 1.82  | 0.02035  | MFS transporter                                                                                                            |            |
| CIMG_06720 | 2.59  | 8.02E-10 | 3.76  | 2.29E-12 | triglyceride lipase-cholesterol esterase                                                                                   | <b>* S</b> |
| CIMG_06721 | 2.70  | 2.55E-07 | 1.72  | 0.01571  | conserved hypothetical protein                                                                                             |            |
| CIMG_06725 | 1.33  | 0.04616  | 2.12  | 0.00036  | conserved hypothetical protein                                                                                             |            |
| CIMG_06728 | 1.95  | 0.00042  | 2.04  | 0.01555  | conserved hypothetical protein (Ankyrin repeats, F-box domain)                                                             |            |
| CIMG_06765 | 4.28  | 0.00021  | 9.90  | 6.80E-12 | conserved hypothetical protein                                                                                             |            |
| CIMG_06768 | 1.74  | 0.00117  | 4.60  | 2.20E-12 | conserved hypothetical protein                                                                                             |            |
| CIMG_06770 | 2.96  | 2.30E-12 | 2.18  | 0.00001  | phosphoinositide 3-kinase                                                                                                  |            |
| CIMG_06773 | 3.98  | 5.85E-08 | 2.17  | 0.00917  | conserved hypothetical protein                                                                                             | <b>G</b>   |
| CIMG_06775 | 1.60  | 0.00100  | 1.68  | 0.01338  | serine/threonine-protein kinase PRKX                                                                                       |            |
| CIMG_06787 | 4.34  | 8.04E-16 | 2.71  | 3.13E-07 | conserved hypothetical protein (Coiled-coil domain containing protein (DUF2052))                                           |            |
| CIMG_06790 | 2.00  | 0.00003  | 1.96  | 0.00007  | serine/threonine protein kinase                                                                                            |            |
| CIMG_06791 | 8.37  | 1.57E-13 | 3.69  | 6.23E-06 | conserved hypothetical protein                                                                                             |            |
| CIMG_06797 | 3.05  | 3.65E-06 | 6.77  | 3.23E-14 | conserved hypothetical protein                                                                                             |            |
| CIMG_06798 | 3.34  | 1.46E-14 | 3.75  | 7.06E-13 | conserved hypothetical protein                                                                                             |            |
| CIMG_06799 | 2.20  | 1.87E-06 | 2.80  | 1.19E-09 | high osmolarity signaling protein Sho1                                                                                     |            |
| CIMG_06816 | 3.23  | 0.00036  | 2.46  | 0.01529  | conserved hypothetical protein                                                                                             |            |
| CIMG_06830 | 1.57  | 0.02112  | 2.65  | 6.65E-06 | short chain dehydrogenase                                                                                                  |            |
| CIMG_06836 | 1.56  | 0.00694  | 2.70  | 9.55E-07 | isocitrate dehydrogenase                                                                                                   |            |
| CIMG_06849 | 1.76  | 0.01309  | 1.35  | 0.02908  | conserved hypothetical protein (Fungal Zn(2)-Cys(6) binuclear cluster domain)                                              |            |
| CIMG_06853 | 1.99  | 0.00258  | 9.49  | 1.97E-11 | conserved hypothetical protein                                                                                             |            |
| CIMG_06858 | 1.68  | 0.00043  | 5.29  | 5.33E-18 | mannosylphosphate transferase                                                                                              | <b>*</b>   |
| CIMG_06865 | 1.64  | 0.01386  | 2.68  | 5.89E-07 | conserved hypothetical protein (FAD dependent oxidoreductase)                                                              |            |
| CIMG_06866 | 7.33  | 1.07E-06 | 4.68  | 7.76E-07 | conserved hypothetical protein                                                                                             |            |
| CIMG_06867 | 2.15  | 0.00027  | 4.86  | 1.35E-12 | conserved hypothetical protein (Major facilitator superfamily)                                                             |            |
| CIMG_06877 | 6.65  | 1.68E-09 | 3.82  | 2.48E-08 | conserved hypothetical protein                                                                                             |            |
| CIMG_06881 | 9.93  | 4.57E-17 | 3.30  | 4.20E-09 | MFS transporter                                                                                                            |            |
| CIMG_06882 | 7.76  | 9.00E-08 | 12.43 | 1.33E-14 | conserved hypothetical protein                                                                                             |            |
| CIMG_06898 | 2.63  | 0.00001  | 2.86  | 0.00004  | conserved hypothetical protein                                                                                             |            |
| CIMG_06907 | 1.93  | 0.00008  | 2.37  | 0.00007  | conserved hypothetical protein                                                                                             |            |
| CIMG_06911 | 3.10  | 1.01E-13 | 4.55  | 1.26E-16 | lanthionine synthetase C family protein                                                                                    |            |
| CIMG_06959 | 2.56  | 5.76E-10 | 3.65  | 6.73E-13 | conserved hypothetical protein                                                                                             |            |
| CIMG_06964 | 1.62  | 0.01133  | 2.60  | 2.10E-06 | sterol desaturase family                                                                                                   | <b>*</b>   |
| CIMG_06969 | 1.97  | 0.00008  | 2.31  | 0.00003  | heat shock protein 78                                                                                                      | <b>+ S</b> |
| CIMG_06976 | 3.90  | 5.34E-11 | 1.97  | 0.00902  | conserved hypothetical protein                                                                                             |            |
| CIMG_06980 | 2.42  | 0.00336  | 4.82  | 0.00002  | conserved hypothetical protein                                                                                             |            |
| CIMG_06984 | 6.27  | 2.19E-11 | 4.55  | 2.51E-12 | conserved hypothetical protein                                                                                             |            |
| CIMG_06996 | 3.96  | 3.30E-06 | 8.30  | 8.10E-07 | conserved hypothetical protein                                                                                             |            |
| CIMG_07013 | 4.45  | 5.22E-20 | 3.35  | 7.21E-10 | transmembrane amino acid transporter                                                                                       |            |
| CIMG_07014 | 1.83  | 0.03030  | 1.62  | 0.03987  | conserved hypothetical protein                                                                                             |            |
| CIMG_07020 | 3.17  | 0.00009  | 3.90  | 0.00047  | conserved hypothetical protein                                                                                             |            |
| CIMG_07031 | 2.19  | 1.16E-08 | 7.21  | 9.89E-27 | glutamyl-tRNA synthetase                                                                                                   |            |
| CIMG_07032 | 2.58  | 5.12E-09 | 7.99  | 3.84E-17 | calcium transporter                                                                                                        |            |
| CIMG_07033 | 1.55  | 0.00413  | 2.05  | 0.00001  | conserved hypothetical protein (LSM domain)                                                                                |            |
| CIMG_07034 | 2.74  | 3.11E-11 | 2.31  | 9.31E-07 | conserved hypothetical protein                                                                                             |            |
| CIMG_07036 | 1.70  | 0.00055  | 4.03  | 1.24E-10 | cytoplasm protein (asparagine synthase)                                                                                    |            |
| CIMG_07062 | 3.68  | 2.59E-12 | 2.94  | 0.00025  | conserved hypothetical protein                                                                                             |            |
| CIMG_07072 | 2.16  | 0.00002  | 2.40  | 0.00005  | conserved hypothetical protein                                                                                             |            |
| CIMG_07073 | 1.60  | 0.00134  | 2.38  | 1.55E-09 | alkaline dihydroceramidase Ydc1                                                                                            |            |
| CIMG_07082 | 6.88  | 8.50E-22 | 5.69  | 1.99E-19 | citric acid biosynthesis oxidoreductase CtnB                                                                               |            |
| CIMG_07083 | 4.09  | 8.38E-09 | 2.43  | 0.00009  | conserved hypothetical protein (Major Facilitator Superfamily)                                                             |            |
| CIMG_07085 | 5.26  | 1.28E-12 | 5.03  | 1.68E-08 | citric acid biosynthesis oxygenase CtnA                                                                                    |            |
| CIMG_07086 | 5.99  | 3.46E-15 | 2.13  | 0.01524  | conserved hypothetical protein (Fungal specific transcription factor domain, fungal Zn(2)-Cys(6) binuclear cluster domain) |            |
| CIMG_07088 | 4.31  | 8.48E-07 | 9.97  | 3.39E-25 | zinc-binding oxidoreductase CipB                                                                                           |            |
| CIMG_07089 | 12.09 | 9.74E-12 | 48.44 | 2.60E-48 | conserved hypothetical protein (YCII-related domain)                                                                       |            |
| CIMG_07091 | 1.55  | 0.00361  | 1.49  | 0.01341  | LIM domain-containing protein                                                                                              |            |

\*: Predicted secreted;

+: Gene under positive selection [19]; G: Gene gained in Coccidioides [19]

H, S: Up-regulated in Hyphae or Spherule by microarray [18]

**Table S2: All genes up-regulated in parasitic phase**

|            |       |          |       |          |                                                                                  |   |
|------------|-------|----------|-------|----------|----------------------------------------------------------------------------------|---|
| CIMG_07094 | 1.64  | 0.00688  | 2.08  | 0.00102  | nitrilase                                                                        |   |
| CIMG_07101 | 1.50  | 0.00699  | 2.43  | 4.96E-06 | protein kinase                                                                   |   |
| CIMG_07102 | 2.30  | 1.98E-07 | 1.64  | 0.00802  | 3-oxoacyl-(acyl-carrier-protein) reductase                                       |   |
| CIMG_07137 | 1.56  | 0.00228  | 2.17  | 2.98E-06 | cholinephosphate cytidyltransferase                                              |   |
| CIMG_07140 | 2.29  | 3.08E-08 | 2.48  | 7.43E-07 | acetyltransferase (GNAT family)                                                  |   |
| CIMG_07153 | 2.60  | 6.87E-11 | 16.99 | 6.60E-52 | conserved hypothetical protein                                                   |   |
| CIMG_07162 | 6.70  | 0.00001  | 4.41  | 0.00191  | conserved hypothetical protein                                                   |   |
| CIMG_07166 | 1.61  | 0.00131  | 4.34  | 4.20E-15 | conserved hypothetical protein (putative patatin-like phospholipase)             |   |
| CIMG_07167 | 1.36  | 0.02508  | 1.52  | 0.01563  | conserved hypothetical protein (RXT2-like N-terminal domain)                     |   |
| CIMG_07176 | 1.35  | 0.04692  | 1.64  | 0.00138  | UPF0160 domain-containing protein MYG1                                           |   |
| CIMG_07177 | 1.76  | 0.00022  | 1.55  | 0.01063  | conserved hypothetical protein (putative ER membrane protein ICE2)               | * |
| CIMG_07180 | 1.78  | 0.00017  | 3.56  | 8.15E-14 | DUF431 domain-containing protein (predicted SAM-dependent RNA methyltransferase) |   |
| CIMG_07182 | 1.64  | 0.00148  | 1.58  | 0.01039  | WD repeat protein                                                                |   |
| CIMG_07184 | 5.46  | 9.97E-11 | 2.11  | 0.01407  | conserved hypothetical protein                                                   |   |
| CIMG_07189 | 3.25  | 3.72E-07 | 18.52 | 2.25E-24 | conserved hypothetical protein                                                   |   |
| CIMG_07201 | 2.31  | 0.00005  | 3.90  | 1.06E-10 | conserved hypothetical protein                                                   |   |
| CIMG_07203 | 1.47  | 0.00338  | 1.49  | 0.02898  | glycerol-3-phosphate dehydrogenase                                               |   |
| CIMG_07216 | 1.96  | 0.00001  | 6.28  | 2.94E-23 | salicylate hydroxylase                                                           | * |
| CIMG_07237 | 1.77  | 0.00033  | 3.20  | 9.48E-09 | conserved hypothetical protein                                                   |   |
| CIMG_07255 | 1.67  | 0.00043  | 1.59  | 0.02887  | conserved hypothetical protein                                                   |   |
| CIMG_07256 | 2.08  | 0.00001  | 2.34  | 0.00003  | adoMet-dependent tRNA methyltransferase complex subunit Trm112                   |   |
| CIMG_07263 | 2.08  | 0.00005  | 2.59  | 2.84E-06 | isocitrate dehydrogenase subunit 1                                               |   |
| CIMG_07265 | 1.81  | 0.00004  | 1.63  | 0.00566  | methyltransferase                                                                |   |
| CIMG_07270 | 1.72  | 0.00019  | 1.93  | 0.00057  | conserved hypothetical protein (HCNGP-like protein)                              |   |
| CIMG_07281 | 5.31  | 2.98E-12 | 2.97  | 0.00002  | conserved hypothetical protein                                                   |   |
| CIMG_07287 | 1.65  | 0.00029  | 2.01  | 2.79E-06 | DnaJ chaperone                                                                   |   |
| CIMG_07295 | 2.28  | 2.85E-07 | 7.78  | 1.11E-26 | conserved hypothetical protein                                                   |   |
| CIMG_07309 | 3.09  | 0.00001  | 2.00  | 0.01513  | conserved hypothetical protein                                                   |   |
| CIMG_07324 | 1.63  | 0.00240  | 1.58  | 0.01315  | 26S protease regulatory subunit S10B                                             |   |
| CIMG_07329 | 2.01  | 3.01E-06 | 1.59  | 0.00855  | telomere-binding alpha subunit central domain-containing protein                 |   |
| CIMG_07333 | 1.51  | 0.00353  | 2.19  | 1.72E-06 | sulphite efflux pump protein                                                     |   |
| CIMG_07338 | 9.99  | 1.58E-30 | 10.30 | 2.43E-35 | essential protein Yae1                                                           |   |
| CIMG_07339 | 10.95 | 3.05E-32 | 6.14  | 4.11E-27 | conserved hypothetical protein (Putative phosphatase regulatory subunit)         |   |
| CIMG_07354 | 2.07  | 0.00003  | 1.64  | 0.02224  | RNA polymerase II transcription factor B subunit 5                               |   |
| CIMG_07462 | 1.81  | 0.00004  | 2.12  | 0.00005  | diacylglycerol O-acyltransferase                                                 |   |
| CIMG_07464 | 1.33  | 0.04735  | 1.99  | 0.00011  | conserved hypothetical protein (G-patch domain)                                  |   |
| CIMG_07514 | 3.11  | 0.00001  | 2.67  | 0.00209  | conserved hypothetical protein                                                   |   |
| CIMG_07525 | 1.88  | 0.00005  | 2.93  | 2.22E-10 | amino acid permease                                                              |   |
| CIMG_07529 | 1.71  | 0.00088  | 1.80  | 0.00118  | conserved hypothetical protein                                                   | * |
| CIMG_07537 | 7.53  | 1.32E-29 | 1.62  | 0.00189  | conserved hypothetical protein                                                   |   |
| CIMG_07542 | 1.58  | 0.00220  | 2.03  | 0.00009  | type II protein geranylgeranyltransferase, beta subunit                          |   |
| CIMG_07543 | 3.94  | 2.32E-08 | 3.27  | 0.00005  | conserved hypothetical protein                                                   |   |
| CIMG_07565 | 1.65  | 0.00110  | 2.28  | 6.59E-06 | BEM46 family protein                                                             |   |
| CIMG_07572 | 3.71  | 9.28E-10 | 3.97  | 1.33E-10 | conserved hypothetical protein (Fungal Zn(2)-Cys(6) binuclear cluster domain)    |   |
| CIMG_07600 | 1.46  | 0.01923  | 1.76  | 0.00054  | NUDIX domain-containing protein                                                  |   |
| CIMG_07608 | 2.90  | 2.88E-10 | 2.95  | 1.80E-07 | conserved hypothetical protein                                                   |   |
| CIMG_07610 | 4.21  | 0.00014  | 1.99  | 0.03243  | conserved hypothetical protein                                                   |   |
| CIMG_07632 | 3.35  | 3.71E-06 | 1.83  | 0.00625  | conserved hypothetical protein                                                   |   |
| CIMG_07636 | 5.10  | 5.33E-23 | 5.25  | 1.38E-17 | conserved hypothetical protein                                                   |   |
| CIMG_07640 | 3.55  | 6.84E-14 | 3.27  | 3.15E-10 | conserved hypothetical protein (Phosphotransferase enzyme family)                |   |
| CIMG_07644 | 1.83  | 0.01653  | 6.80  | 2.63E-09 | conserved hypothetical protein                                                   |   |
| CIMG_07645 | 7.33  | 1.05E-27 | 2.19  | 0.00004  | protein kinase domain-containing protein                                         |   |
| CIMG_07646 | 24.59 | 1.19E-53 | 7.49  | 1.79E-21 | conserved hypothetical protein                                                   |   |
| CIMG_07647 | 7.28  | 5.08E-21 | 2.55  | 9.80E-07 | conserved hypothetical protein                                                   |   |
| CIMG_07651 | 2.13  | 0.00006  | 1.84  | 0.00581  | conserved hypothetical protein                                                   |   |
| CIMG_07661 | 2.09  | 1.15E-06 | 1.54  | 0.02033  | glucose-6-phosphate 1-dehydrogenase                                              |   |
| CIMG_07665 | 4.07  | 9.01E-11 | 3.04  | 2.69E-06 | mitochondrial phosphate carrier protein 2                                        |   |
| CIMG_07666 | 1.90  | 0.00421  | 5.07  | 3.06E-12 | conserved hypothetical protein                                                   | G |
| CIMG_07675 | 3.01  | 5.02E-12 | 1.92  | 0.00009  | SH3 domain-containing protein                                                    |   |
| CIMG_07676 | 1.71  | 0.00330  | 1.91  | 0.00070  | conserved hypothetical protein                                                   | * |
| CIMG_07685 | 3.37  | 1.24E-07 | 21.69 | 2.99E-29 | conserved hypothetical protein                                                   |   |
| CIMG_07692 | 1.52  | 0.00706  | 2.93  | 1.04E-08 | NADH-ubiquinone oxidoreductase subunit GRIM-19                                   |   |
| CIMG_07700 | 2.67  | 2.98E-10 | 5.21  | 6.21E-17 | conserved hypothetical protein                                                   |   |
| CIMG_07701 | 1.44  | 0.00481  | 5.00  | 1.31E-13 | conserved hypothetical protein                                                   |   |
| CIMG_07702 | 2.48  | 0.00019  | 2.37  | 0.00002  | conserved hypothetical protein                                                   | * |
| CIMG_07706 | 2.82  | 1.77E-07 | 1.76  | 0.04096  | conserved hypothetical protein (F-box domain)                                    |   |
| CIMG_07711 | 3.61  | 1.04E-14 | 1.83  | 0.00209  | conserved hypothetical protein                                                   |   |
| CIMG_07721 | 5.80  | 9.73E-07 | 2.52  | 0.01157  | conserved hypothetical protein                                                   |   |
| CIMG_07723 | 1.49  | 0.04659  | 2.69  | 1.53E-06 | polysaccharide synthase Cps1                                                     |   |
| CIMG_07724 | 3.20  | 0.00002  | 2.59  | 0.00092  | conserved hypothetical protein                                                   |   |
| CIMG_07734 | 1.49  | 0.00788  | 1.54  | 0.03695  | helicase swr1                                                                    |   |
| CIMG_07743 | 2.09  | 0.00029  | 2.68  | 0.00073  | conserved hypothetical protein                                                   |   |
| CIMG_07753 | 3.91  | 2.00E-16 | 5.16  | 1.03E-17 | conserved hypothetical protein                                                   |   |
| CIMG_07755 | 2.87  | 1.54E-09 | 3.62  | 4.19E-10 | conserved hypothetical protein                                                   | G |
| CIMG_07757 | 1.69  | 0.00022  | 2.22  | 4.86E-06 | conserved hypothetical protein                                                   |   |
| CIMG_07766 | 4.13  | 6.47E-14 | 3.54  | 4.27E-10 | conserved hypothetical protein (Putative methyltransferase)                      |   |
| CIMG_07798 | 1.80  | 0.00020  | 3.92  | 4.98E-14 | conserved hypothetical protein (Fungal protein of unknown function (DUF1711))    |   |

\*: Predicted secreted;

+: Gene under positive selection [19]; G: Gene gained in Coccidioides [19]

H, S: Up-regulated in Hyphae or Spherule by microarray [18]

**Table S2: All genes up-regulated in parasitic phase**

|            |       |          |       |          |                                                                               |   |
|------------|-------|----------|-------|----------|-------------------------------------------------------------------------------|---|
| CIMG_07803 | 4.77  | 1.38E-19 | 1.54  | 0.03147  | indoleamine 2,3-dioxygenase                                                   |   |
| CIMG_07804 | 1.93  | 0.01097  | 2.50  | 0.00040  | conserved hypothetical protein (tetra-ricopeptide repeat)                     |   |
| CIMG_07806 | 2.04  | 0.00229  | 2.03  | 0.00295  | conserved hypothetical protein                                                |   |
| CIMG_07807 | 4.33  | 2.77E-06 | 9.57  | 1.13E-12 | conserved hypothetical protein                                                |   |
| CIMG_07815 | 3.16  | 6.17E-09 | 11.24 | 9.29E-24 | short chain dehydrogenase/reductase                                           |   |
| CIMG_07822 | 3.47  | 0.00122  | 4.14  | 0.00065  | conserved hypothetical protein                                                |   |
| CIMG_07829 | 8.63  | 2.24E-22 | 2.04  | 0.00207  | conserved hypothetical protein (Fungal Zn(2)-Cys(6) binuclear cluster domain) |   |
| CIMG_07834 | 1.62  | 0.03938  | 2.63  | 1.70E-06 | conserved hypothetical protein (UbiD family decarboxylases)                   |   |
| CIMG_07840 | 4.67  | 0.00001  | 4.69  | 4.27E-06 | conserved hypothetical protein                                                |   |
| CIMG_07842 | 3.52  | 2.49E-13 | 1.81  | 0.00181  | conserved hypothetical protein (WSC domain, putative peroxidase)              | * |
| CIMG_07843 | 3.40  | 3.40E-11 | 1.65  | 0.00028  | prp 6 CRoW domain-containing protein                                          | * |
| CIMG_07849 | 1.70  | 0.00014  | 8.13  | 8.23E-29 | conserved hypothetical protein (DUF2263)                                      |   |
| CIMG_07853 | 2.47  | 0.02317  | 3.71  | 0.00818  | conserved hypothetical protein                                                |   |
| CIMG_07857 | 1.81  | 0.00016  | 2.09  | 0.00003  | hypothetical protein (CHCH domain)                                            | G |
| CIMG_07867 | 1.41  | 0.02013  | 2.30  | 2.39E-06 | SNARE protein                                                                 |   |
| CIMG_07895 | 2.09  | 1.05E-06 | 1.98  | 0.00002  | conserved hypothetical protein                                                |   |
| CIMG_07902 | 1.75  | 0.00134  | 1.90  | 0.00108  | DNA repair protein rad9                                                       |   |
| CIMG_07903 | 2.01  | 4.50E-06 | 1.74  | 0.00006  | alpha-tubulin suppressor protein Aats1                                        |   |
| CIMG_07904 | 5.26  | 1.97E-12 | 3.62  | 1.86E-09 | conserved hypothetical protein                                                |   |
| CIMG_07921 | 5.08  | 0.00001  | 3.92  | 1.78E-07 | conserved hypothetical protein                                                |   |
| CIMG_07930 | 3.66  | 9.06E-16 | 2.38  | 1.75E-06 | conserved hypothetical protein                                                |   |
| CIMG_07948 | 3.92  | 3.15E-08 | 4.23  | 2.36E-08 | conserved hypothetical protein                                                |   |
| CIMG_07949 | 2.06  | 0.00006  | 3.42  | 6.25E-09 | conserved hypothetical protein (NmrA-like family)                             |   |
| CIMG_07959 | 1.71  | 0.01924  | 1.60  | 0.04656  | conserved hypothetical protein (putative ADP-ribosylglycohydrolase)           |   |
| CIMG_07965 | 17.39 | 1.62E-11 | 5.79  | 1.50E-09 | conserved hypothetical protein                                                |   |
| CIMG_07966 | 4.78  | 1.11E-06 | 2.28  | 0.01268  | conserved hypothetical protein                                                |   |
| CIMG_07968 | 2.44  | 0.00021  | 2.53  | 0.00051  | conserved hypothetical protein                                                |   |
| CIMG_07972 | 2.42  | 1.27E-06 | 3.34  | 1.69E-09 | developmental regulator flbA                                                  | S |
| CIMG_07982 | 1.49  | 0.03133  | 1.59  | 0.02747  | DNA replication complex GINS protein PSF2                                     |   |
| CIMG_07983 | 4.89  | 1.28E-08 | 3.57  | 0.00007  | conserved hypothetical protein                                                |   |
| CIMG_07989 | 3.36  | 1.55E-14 | 3.65  | 1.84E-12 | conserved hypothetical protein                                                | * |
| CIMG_07997 | 1.90  | 0.00002  | 3.06  | 4.41E-11 | methylacetate reductase                                                       |   |
| CIMG_07999 | 2.43  | 7.51E-09 | 2.37  | 0.00001  | conserved hypothetical protein                                                |   |
| CIMG_08005 | 3.02  | 5.48E-07 | 2.89  | 3.15E-06 | conserved hypothetical protein                                                |   |
| CIMG_08006 | 3.13  | 0.00086  | 1.94  | 0.01279  | conserved hypothetical protein                                                |   |
| CIMG_08014 | 1.79  | 0.00004  | 2.42  | 0.00004  | conserved hypothetical protein                                                | G |
| CIMG_08017 | 3.43  | 1.50E-12 | 3.71  | 2.18E-11 | nitrate reductase                                                             | S |
| CIMG_08021 | 5.05  | 1.06E-16 | 2.51  | 5.84E-06 | kynurenine 3-monooxygenase                                                    |   |
| CIMG_08028 | 2.52  | 9.41E-10 | 3.35  | 1.36E-11 | conserved hypothetical protein (DUF1769)                                      |   |
| CIMG_08040 | 3.20  | 0.00027  | 4.92  | 0.00220  | conserved hypothetical protein                                                |   |
| CIMG_08044 | 3.97  | 1.23E-08 | 13.58 | 2.98E-27 | cell wall integrity signaling protein Lsp1/Pil1                               |   |
| CIMG_08048 | 2.67  | 1.12E-10 | 1.71  | 0.00142  | LSM domain-containing protein                                                 |   |
| CIMG_08051 | 1.68  | 0.00063  | 1.84  | 0.00103  | chromatin assembly factor 1 subunit B                                         |   |
| CIMG_08055 | 2.30  | 0.00048  | 7.83  | 1.55E-18 | hypothetical protein                                                          |   |
| CIMG_08056 | 7.96  | 4.14E-07 | 2.75  | 0.00126  | conserved hypothetical protein                                                |   |
| CIMG_08072 | 6.62  | 2.36E-16 | 3.93  | 1.89E-08 | conserved hypothetical protein (cytochrome P450)                              |   |
| CIMG_08077 | 4.66  | 7.04E-12 | 3.05  | 8.53E-07 | conserved hypothetical protein                                                | * |
| CIMG_08082 | 5.46  | 6.18E-23 | 2.35  | 1.44E-08 | mitochondrial import receptor subunit                                         |   |
| CIMG_08085 | 3.51  | 3.45E-15 | 3.21  | 9.07E-10 | conserved hypothetical protein                                                |   |
| CIMG_08096 | 1.76  | 0.00011  | 2.09  | 0.00017  | conserved hypothetical protein                                                |   |
| CIMG_08103 | 6.50  | 1.09E-11 | 56.16 | 2.50E-48 | opsin 1                                                                       |   |
| CIMG_08116 | 1.87  | 0.00374  | 2.07  | 0.00303  | conserved hypothetical protein                                                |   |
| CIMG_08119 | 2.28  | 6.47E-08 | 2.36  | 6.23E-06 | DNA-directed polymerase kappa                                                 |   |
| CIMG_08122 | 1.92  | 0.00566  | 2.10  | 0.00357  | conserved hypothetical protein                                                |   |
| CIMG_08132 | 2.62  | 9.39E-07 | 1.84  | 0.00466  | conserved hypothetical protein                                                |   |
| CIMG_08150 | 1.79  | 0.00192  | 1.55  | 0.00022  | carbon catabolite repressor                                                   |   |
| CIMG_08152 | 3.69  | 1.60E-11 | 3.00  | 0.00009  | conserved hypothetical protein                                                |   |
| CIMG_08153 | 4.85  | 0.00002  | 3.98  | 0.00006  | conserved hypothetical protein                                                |   |
| CIMG_08154 | 1.97  | 0.02272  | 2.31  | 0.01558  | conserved hypothetical protein                                                |   |
| CIMG_08155 | 1.58  | 0.00142  | 1.83  | 0.00052  | MOSC domain-containing protein                                                |   |
| CIMG_08156 | 3.80  | 2.02E-16 | 3.03  | 1.74E-10 | conserved hypothetical protein                                                |   |
| CIMG_08157 | 3.90  | 1.42E-12 | 3.65  | 6.34E-13 | conserved hypothetical protein                                                |   |
| CIMG_08158 | 6.16  | 4.86E-08 | 5.06  | 9.20E-12 | acyl-CoA desaturase                                                           |   |
| CIMG_08167 | 2.64  | 7.23E-09 | 2.66  | 0.00003  | 5-formyltetrahydrofolate cyclo-ligase                                         |   |
| CIMG_08168 | 1.83  | 0.00021  | 1.66  | 0.01075  | rot1 (chaperone for protein-folding within the ER)                            | * |
| CIMG_08180 | 2.23  | 2.10E-06 | 2.99  | 1.19E-07 | conserved hypothetical protein (F-box domain)                                 |   |
| CIMG_08195 | 1.51  | 0.00460  | 1.66  | 0.01392  | acetyltransferase                                                             |   |
| CIMG_08201 | 1.78  | 0.00057  | 5.48  | 2.00E-16 | conserved hypothetical protein                                                |   |
| CIMG_08209 | 1.76  | 0.00066  | 8.62  | 4.81E-22 | cytochrome c peroxidase Ccp1                                                  |   |
| CIMG_08221 | 5.16  | 3.64E-09 | 2.53  | 0.00039  | high affinity methionine permease                                             |   |
| CIMG_08289 | 5.86  | 5.08E-20 | 5.49  | 2.14E-08 | calcium/calmodulin dependent protein kinase                                   |   |
| CIMG_08294 | 1.87  | 0.00002  | 2.98  | 3.72E-09 | conserved hypothetical protein                                                |   |
| CIMG_08303 | 1.67  | 0.00079  | 2.25  | 0.00002  | conserved hypothetical protein                                                |   |
| CIMG_08310 | 1.36  | 0.02155  | 3.37  | 1.82E-10 | MFS monosaccharide transporter                                                |   |
| CIMG_08323 | 3.71  | 1.86E-16 | 3.05  | 2.84E-09 | conserved hypothetical protein                                                |   |
| CIMG_08328 | 4.18  | 5.53E-19 | 4.21  | 3.71E-15 | conserved hypothetical protein                                                |   |
| CIMG_08337 | 2.46  | 2.47E-07 | 2.08  | 0.00210  | molybdenum cofactor sulfuryase                                                | * |
| CIMG_08342 | 6.21  | 4.91E-08 | 3.37  | 0.00003  | conserved hypothetical protein                                                |   |
| CIMG_08457 | 2.00  | 0.00256  | 1.95  | 0.00295  | conserved hypothetical protein                                                |   |

\*: Predicted secreted;

+: Gene under positive selection [19]; G: Gene gained in Coccidioides [19]

H, S: Up-regulated in Hyphae or Spherule by microarray [18]

**Table S2: All genes up-regulated in parasitic phase**

|            |       |          |       |          |                                                                                |   |
|------------|-------|----------|-------|----------|--------------------------------------------------------------------------------|---|
| CIMG_08458 | 1.61  | 0.00139  | 3.24  | 3.59E-10 | glutamyl-tRNA amidotransferase                                                 |   |
| CIMG_08474 | 8.94  | 1.55E-29 | 5.42  | 2.68E-09 | conserved hypothetical protein                                                 |   |
| CIMG_08477 | 2.33  | 0.00003  | 1.57  | 0.00842  | fatty acid synthase alpha subunit FasA                                         |   |
| CIMG_08490 | 1.77  | 0.01471  | 4.03  | 3.20E-07 | conserved hypothetical protein                                                 |   |
| CIMG_08491 | 1.79  | 0.00254  | 1.40  | 0.03673  | conserved hypothetical protein                                                 |   |
| CIMG_08492 | 2.44  | 1.01E-07 | 1.94  | 0.00102  | inositol pyrophosphate synthase                                                |   |
| CIMG_08495 | 1.70  | 0.01237  | 3.10  | 4.48E-06 | conserved hypothetical protein                                                 |   |
| CIMG_08504 | 2.84  | 2.05E-07 | 2.24  | 0.00601  | conserved hypothetical protein (PAN domain)                                    | * |
| CIMG_08509 | 3.07  | 6.30E-11 | 2.58  | 2.88E-07 | conserved hypothetical protein (Pterin 4 alpha carbinolamine dehydratase)      |   |
| CIMG_08518 | 2.45  | 1.78E-07 | 2.83  | 2.69E-07 | riboflavin-specific deaminase                                                  |   |
| CIMG_08530 | 4.53  | 5.37E-10 | 11.94 | 6.44E-18 | conserved hypothetical protein                                                 |   |
| CIMG_08535 | 1.65  | 0.00240  | 1.85  | 0.00139  | ubiquitin-conjugating enzyme E2 6                                              |   |
| CIMG_08537 | 2.03  | 0.00001  | 2.20  | 0.00003  | cytochrome c heme lyase                                                        |   |
| CIMG_08540 | 3.84  | 2.14E-15 | 4.10  | 2.04E-12 | ubiquinone biosynthesis protein (ABC1 family)                                  |   |
| CIMG_08545 | 1.35  | 0.03383  | 2.96  | 1.30E-08 | short chain dehydrogenase/reductase                                            |   |
| CIMG_08547 | 1.56  | 0.00319  | 2.07  | 0.00020  | conserved hypothetical protein                                                 |   |
| CIMG_08563 | 2.09  | 1.08E-06 | 1.37  | 0.04164  | AflT                                                                           |   |
| CIMG_08564 | 2.86  | 2.54E-11 | 1.78  | 0.00175  | fatty-acid synthase                                                            |   |
| CIMG_08613 | 2.20  | 0.00372  | 4.40  | 6.21E-08 | metalloproteinase 7                                                            | * |
| CIMG_08614 | 3.17  | 0.00425  | 4.46  | 0.00010  | conserved hypothetical protein                                                 |   |
| CIMG_08623 | 1.73  | 0.00144  | 2.30  | 0.00074  | actin-like protein arp6                                                        |   |
| CIMG_08637 | 2.71  | 1.35E-10 | 13.98 | 5.77E-36 | copper resistance protein Crd2                                                 |   |
| CIMG_08653 | 3.07  | 3.74E-07 | 2.78  | 2.52E-15 | conserved hypothetical protein                                                 |   |
| CIMG_08660 | 1.68  | 0.00068  | 1.59  | 0.02754  | SAC3/GANP domain-containing protein                                            |   |
| CIMG_08671 | 4.67  | 3.48E-12 | 2.57  | 0.00161  | conserved hypothetical protein                                                 |   |
| CIMG_08675 | 2.30  | 1.19E-06 | 2.09  | 0.00010  | conserved hypothetical protein                                                 |   |
| CIMG_08679 | 2.51  | 1.17E-08 | 1.93  | 2.99E-06 | conserved hypothetical protein (putative mitochondrial 18 KDa protein (MTP18)) |   |
| CIMG_08686 | 4.00  | 1.24E-08 | 4.61  | 3.21E-12 | conserved hypothetical protein                                                 |   |
| CIMG_08701 | 2.85  | 0.01954  | 2.61  | 0.00649  | conserved hypothetical protein                                                 |   |
| CIMG_08703 | 1.55  | 0.00280  | 2.21  | 3.99E-06 | conserved hypothetical protein (Alkaline phytoceramidase (aPHC))               |   |
| CIMG_08709 | 3.13  | 0.00007  | 3.31  | 0.00009  | conserved hypothetical protein                                                 |   |
| CIMG_08716 | 2.10  | 4.31E-07 | 3.53  | 1.49E-11 | malic acid transporter                                                         |   |
| CIMG_08719 | 1.45  | 0.00957  | 2.19  | 0.00006  | conserved hypothetical protein                                                 |   |
| CIMG_08720 | 4.31  | 3.56E-10 | 9.82  | 2.14E-22 | fumarate reductase Osm1                                                        | * |
| CIMG_08724 | 2.61  | 0.00001  | 4.27  | 5.32E-13 | acetyl-coA hydrolase Ach1                                                      |   |
| CIMG_08770 | 4.64  | 5.39E-21 | 5.19  | 1.18E-19 | MFS multidrug transporter                                                      |   |
| CIMG_08779 | 2.21  | 0.00013  | 4.91  | 5.54E-16 | conserved hypothetical protein (Putative methyltransferase)                    |   |
| CIMG_08780 | 2.19  | 3.33E-07 | 2.15  | 0.00031  | conserved hypothetical protein                                                 |   |
| CIMG_08782 | 7.55  | 1.37E-28 | 6.11  | 4.87E-19 | conserved hypothetical protein                                                 |   |
| CIMG_08783 | 3.16  | 0.00001  | 2.04  | 0.00705  | conserved hypothetical protein                                                 |   |
| CIMG_08815 | 1.44  | 0.01139  | 2.02  | 0.00182  | threonine dehydratase                                                          |   |
| CIMG_08832 | 2.86  | 0.00001  | 3.03  | 0.00002  | conserved hypothetical protein                                                 |   |
| CIMG_08867 | 1.91  | 0.00005  | 1.98  | 0.00323  | MFS multidrug transporter                                                      |   |
| CIMG_08872 | 2.97  | 1.09E-09 | 2.88  | 4.27E-09 | oxidoreductase (2OG-Fe(II) oxygenase superfamily)                              |   |
| CIMG_08873 | 3.35  | 8.26E-09 | 5.93  | 5.22E-17 | NmrA family transcriptional regulator                                          |   |
| CIMG_08879 | 1.53  | 0.01293  | 1.69  | 0.02078  | 6-phosphofruktokinase                                                          |   |
| CIMG_08903 | 2.21  | 0.00100  | 2.76  | 0.00081  | conserved hypothetical protein                                                 |   |
| CIMG_08913 | 1.67  | 0.02646  | 4.49  | 3.27E-12 | conserved hypothetical protein                                                 |   |
| CIMG_08914 | 1.61  | 0.04593  | 2.16  | 0.00014  | conserved hypothetical protein                                                 |   |
| CIMG_08919 | 2.01  | 1.06E-06 | 4.17  | 4.18E-19 | conserved hypothetical protein (NmrA-like family)                              |   |
| CIMG_08979 | 1.59  | 0.00221  | 1.54  | 0.02547  | proteasome regulatory particle subunit                                         |   |
| CIMG_08986 | 2.76  | 5.73E-10 | 4.76  | 2.94E-14 | MFS monocarboxylate transporter                                                |   |
| CIMG_08990 | 3.07  | 2.98E-10 | 3.07  | 2.90E-08 | mitochondrial hypoxia responsive domain-containing protein                     |   |
| CIMG_08993 | 2.54  | 2.11E-06 | 5.52  | 3.20E-22 | MFS multidrug transporter                                                      |   |
| CIMG_09001 | 3.75  | 6.61E-08 | 6.31  | 1.34E-17 | conserved hypothetical protein                                                 | * |
| CIMG_09013 | 1.83  | 0.00006  | 1.75  | 0.00029  | conserved hypothetical protein                                                 |   |
| CIMG_09020 | 3.92  | 5.48E-17 | 2.41  | 2.78E-06 | conserved hypothetical protein                                                 |   |
| CIMG_09040 | 2.00  | 1.18E-06 | 2.62  | 1.27E-08 | conserved hypothetical protein                                                 |   |
| CIMG_09045 | 2.69  | 2.98E-10 | 3.80  | 2.15E-11 | acyl-CoA thioesterase                                                          |   |
| CIMG_09049 | 3.86  | 6.08E-11 | 4.65  | 1.35E-11 | conserved hypothetical protein                                                 |   |
| CIMG_09058 | 10.28 | 6.62E-17 | 14.16 | 1.87E-17 | conserved hypothetical protein                                                 |   |
| CIMG_09059 | 2.40  | 2.56E-09 | 4.36  | 1.72E-14 | serine palmitoyltransferase 2                                                  |   |
| CIMG_09061 | 1.68  | 0.00030  | 4.43  | 8.94E-21 | acetoacetyl-CoA synthase                                                       |   |
| CIMG_09062 | 2.35  | 2.30E-06 | 1.54  | 0.00462  | mitochondrial processing peptidase alpha subunit                               |   |
| CIMG_09079 | 2.52  | 4.97E-09 | 1.75  | 0.01801  | cation diffusion facilitator 1                                                 |   |
| CIMG_09087 | 4.60  | 1.04E-09 | 2.65  | 0.00008  | conserved hypothetical protein (Fungal Zn(2)-Cys(6) binuclear cluster domain)  |   |
| CIMG_09095 | 4.71  | 1.58E-12 | 4.84  | 2.27E-08 | conserved hypothetical protein                                                 |   |
| CIMG_09097 | 2.47  | 4.12E-08 | 3.59  | 1.04E-10 | conserved hypothetical protein                                                 |   |
| CIMG_09099 | 1.44  | 0.01665  | 2.06  | 0.00004  | HAD superfamily hydrolase                                                      |   |
| CIMG_09105 | 5.55  | 3.88E-08 | 3.90  | 1.65E-06 | conserved hypothetical protein                                                 |   |
| CIMG_09112 | 1.33  | 0.04592  | 1.79  | 0.00243  | TPR repeat protein                                                             |   |
| CIMG_09117 | 2.29  | 0.00016  | 5.06  | 1.12E-06 | conserved hypothetical protein                                                 |   |
| CIMG_09121 | 1.90  | 0.00001  | 3.29  | 2.61E-10 | conserved hypothetical protein                                                 |   |
| CIMG_09140 | 1.96  | 0.00001  | 1.59  | 0.00635  | conserved hypothetical protein                                                 |   |
| CIMG_09146 | 1.38  | 0.04114  | 6.82  | 2.33E-22 | quinone oxidoreductase                                                         |   |
| CIMG_09152 | 2.77  | 2.43E-06 | 3.57  | 1.36E-07 | conserved hypothetical protein (Histidine acid phosphatase)                    | * |
| CIMG_09153 | 4.23  | 3.56E-18 | 1.60  | 0.00940  | conserved hypothetical protein                                                 |   |
| CIMG_09155 | 1.78  | 0.00013  | 1.56  | 0.00917  | serine/threonine-protein kinase nrc-2                                          |   |

\*: Predicted secreted;

+: Gene under positive selection [19]; G: Gene gained in Coccidioides [19]

H, S: Up-regulated in Hyphae or Spherule by microarray [18]



**Table S2: All genes up-regulated in parasitic phase**

|            |       |          |        |          |                                                                               |          |
|------------|-------|----------|--------|----------|-------------------------------------------------------------------------------|----------|
| CIMG_09160 | 1.79  | 0.00057  | 1.78   | 0.01962  | transcription factor TFIIH, subunit Tfb4                                      |          |
| CIMG_09181 | 3.05  | 9.76E-10 | 2.07   | 8.68E-06 | TOR signaling pathway regulator                                               |          |
| CIMG_09188 | 1.53  | 0.00806  | 1.45   | 0.01786  | survival factor 1                                                             |          |
| CIMG_09191 | 1.97  | 0.00001  | 1.62   | 0.00127  | protein kinase                                                                | <b>S</b> |
| CIMG_09194 | 2.18  | 0.00001  | 3.13   | 1.38E-08 | mitochondrial carrier protein                                                 |          |
| CIMG_09205 | 7.27  | 8.86E-12 | 9.96   | 1.22E-19 | conserved hypothetical protein                                                |          |
| CIMG_09211 | 1.67  | 0.00019  | 1.92   | 0.00064  | conserved hypothetical protein                                                | <b>*</b> |
| CIMG_09213 | 2.56  | 2.09E-09 | 1.89   | 0.00270  | nitrogen assimilation transcription factor nirA                               | <b>H</b> |
| CIMG_09214 | 4.06  | 7.89E-07 | 4.17   | 8.71E-08 | conserved hypothetical protein                                                |          |
| CIMG_09226 | 1.58  | 0.01360  | 1.67   | 0.00533  | conserved hypothetical protein (PH domain)                                    |          |
| CIMG_09238 | 6.15  | 1.58E-15 | 18.64  | 2.35E-28 | conserved hypothetical protein                                                |          |
| CIMG_09260 | 2.32  | 0.00007  | 1.81   | 0.00383  | conserved hypothetical protein                                                |          |
| CIMG_09276 | 1.53  | 0.00603  | 3.22   | 9.57E-10 | mitochondrial inner membrane protease subunit 1                               |          |
| CIMG_09286 | 5.27  | 8.24E-14 | 4.92   | 4.05E-10 | conserved hypothetical protein                                                |          |
| CIMG_09309 | 2.06  | 0.00006  | 2.25   | 3.59E-06 | UPF0052 domain-containing protein                                             |          |
| CIMG_09313 | 3.23  | 8.82E-13 | 1.97   | 0.00058  | CorA family metal ion transporter                                             |          |
| CIMG_09317 | 4.04  | 2.02E-18 | 8.27   | 2.88E-30 | conserved hypothetical protein                                                |          |
| CIMG_09319 | 1.40  | 0.02825  | 1.96   | 0.00072  | conserved hypothetical protein (pentatricopeptide repeat domain)              |          |
| CIMG_09324 | 1.61  | 0.00190  | 1.59   | 0.03653  | cell cycle control protein                                                    |          |
| CIMG_09325 | 1.60  | 0.00145  | 2.96   | 5.76E-09 | aminomethyl transferase                                                       |          |
| CIMG_09327 | 2.49  | 1.67E-09 | 2.79   | 3.69E-09 | conserved hypothetical protein                                                |          |
| CIMG_09332 | 3.18  | 0.00001  | 1.70   | 0.01454  | conserved hypothetical protein (DUF2392)                                      |          |
| CIMG_09336 | 4.14  | 1.30E-14 | 29.61  | 1.57E-47 | conserved hypothetical protein                                                |          |
| CIMG_09338 | 28.41 | 3.75E-14 | 15.49  | 1.96E-12 | conserved hypothetical protein                                                |          |
| CIMG_09340 | 3.55  | 1.46E-07 | 2.52   | 0.00021  | C-5 cytosine methyltransferase DmtA                                           |          |
| CIMG_09341 | 3.38  | 1.04E-07 | 6.63   | 2.85E-14 | conserved hypothetical protein                                                |          |
| CIMG_09344 | 1.85  | 0.00010  | 1.93   | 0.00054  | WD repeat protein                                                             |          |
| CIMG_09345 | 3.82  | 1.06E-13 | 1.91   | 0.00036  | mitochondrial oxaloacetate transporter                                        |          |
| CIMG_09353 | 1.97  | 0.00001  | 2.07   | 0.00003  | ribosome biogenesis protein Ria1                                              |          |
| CIMG_09354 | 2.40  | 2.67E-07 | 2.21   | 0.00002  | conserved hypothetical protein                                                |          |
| CIMG_09404 | 1.77  | 0.00017  | 1.48   | 0.00558  | conserved hypothetical protein                                                |          |
| CIMG_09405 | 3.82  | 2.24E-16 | 2.50   | 1.07E-06 | conserved hypothetical protein                                                |          |
| CIMG_09408 | 1.39  | 0.03709  | 2.01   | 0.00045  | conserved hypothetical protein                                                |          |
| CIMG_09424 | 1.38  | 0.03041  | 2.62   | 4.02E-07 | 50S ribosomal subunit L30                                                     |          |
| CIMG_09431 | 2.36  | 0.03277  | 5.35   | 1.76E-06 | conserved hypothetical protein                                                |          |
| CIMG_09439 | 6.39  | 3.91E-27 | 3.43   | 3.95E-13 | conserved hypothetical protein                                                |          |
| CIMG_09440 | 3.05  | 2.17E-08 | 5.04   | 7.46E-13 | conserved hypothetical protein (PHD-finger)                                   |          |
| CIMG_09459 | 1.58  | 0.00574  | 1.81   | 0.00072  | conserved hypothetical protein (Protein of unknown function (DUF2454))        |          |
| CIMG_09471 | 8.07  | 9.41E-26 | 19.28  | 1.73E-32 | tyrosinase central domain-containing protein                                  | <b>*</b> |
| CIMG_09477 | 2.39  | 1.67E-09 | 3.12   | 7.61E-11 | cyanate hydratase                                                             |          |
| CIMG_09478 | 4.17  | 2.08E-16 | 25.83  | 5.34E-48 | 3-dehydroshikimate dehydratase                                                |          |
| CIMG_09483 | 4.78  | 9.80E-18 | 7.65   | 1.29E-26 | conserved hypothetical protein                                                |          |
| CIMG_09484 | 5.29  | 1.27E-14 | 4.16   | 4.89E-13 | conserved hypothetical protein                                                |          |
| CIMG_09485 | 4.64  | 7.54E-21 | 4.28   | 1.46E-18 | conserved hypothetical protein (Fungal protein of unknown function (DUF1760)) |          |
| CIMG_09486 | 3.50  | 8.98E-14 | 5.80   | 7.31E-20 | conserved hypothetical protein                                                |          |
| CIMG_09494 | 2.44  | 2.06E-08 | 3.18   | 4.26E-11 | conserved hypothetical protein                                                |          |
| CIMG_09498 | 3.16  | 1.13E-13 | 9.73   | 1.44E-39 | conserved hypothetical protein                                                | <b>*</b> |
| CIMG_09499 | 1.47  | 0.01213  | 1.51   | 0.01139  | conserved hypothetical protein (B-block binding subunit of TFIIC)             |          |
| CIMG_09500 | 2.19  | 0.01091  | 5.29   | 1.34E-06 | conserved hypothetical protein                                                | <b>*</b> |
| CIMG_09502 | 1.62  | 0.00120  | 1.81   | 0.00017  | glutamyl-tRNA synthetase                                                      |          |
| CIMG_09521 | 3.25  | 2.99E-12 | 1.56   | 0.02528  | serine peptidase, family S28                                                  | <b>*</b> |
| CIMG_09522 | 2.02  | 0.00005  | 1.59   | 0.03219  | FAD binding domain-containing protein                                         |          |
| CIMG_09523 | 1.31  | 0.04692  | 2.35   | 7.52E-07 | conserved hypothetical protein                                                | <b>*</b> |
| CIMG_09539 | 64.98 | 4.20E-26 | 184.24 | 8.57E-61 | conserved hypothetical protein                                                |          |
| CIMG_09540 | 2.01  | 0.00059  | 5.74   | 1.57E-19 | conserved hypothetical protein                                                |          |
| CIMG_09541 | 2.91  | 0.02495  | 7.35   | 3.00E-09 | conserved hypothetical protein                                                |          |
| CIMG_09568 | 1.59  | 0.00159  | 1.69   | 0.01011  | INO80 chromatin remodeling complex                                            |          |
| CIMG_09581 | 3.33  | 1.15E-07 | 4.33   | 1.57E-09 | conserved hypothetical protein                                                |          |
| CIMG_09583 | 1.54  | 0.03115  | 1.83   | 0.01183  | conserved hypothetical protein                                                |          |
| CIMG_09599 | 2.55  | 0.00654  | 4.24   | 0.00038  | conserved hypothetical protein                                                |          |
| CIMG_09609 | 2.69  | 4.18E-07 | 6.90   | 7.38E-22 | conserved hypothetical protein                                                |          |
| CIMG_09614 | 2.10  | 0.01109  | 6.10   | 7.76E-13 | hypothetical protein                                                          |          |
| CIMG_09620 | 2.47  | 2.44E-07 | 1.66   | 0.00936  | recombination hotspot-binding protein                                         |          |
| CIMG_09641 | 2.50  | 2.58E-06 | 1.97   | 0.00074  | conserved hypothetical protein                                                |          |
| CIMG_09642 | 13.43 | 2.07E-34 | 4.19   | 6.15E-09 | conserved hypothetical protein                                                |          |
| CIMG_09668 | 2.48  | 1.74E-07 | 2.87   | 4.98E-08 | conserved hypothetical protein (WD repeat-containing protein 79)              |          |
| CIMG_09695 | 4.74  | 1.90E-12 | 6.17   | 1.29E-12 | conserved hypothetical protein                                                |          |
| CIMG_09698 | 3.90  | 2.65E-07 | 12.16  | 7.05E-11 | conserved hypothetical protein                                                |          |
| CIMG_09707 | 1.61  | 0.00301  | 1.57   | 0.00220  | transcriptional elongation regulator Elc1/Elongin C                           |          |
| CIMG_09714 | 4.36  | 2.28E-08 | 2.92   | 0.00004  | conserved hypothetical protein (RNase P Rpr2/Rpp21/SNM1 subunit domain)       |          |
| CIMG_09743 | 2.64  | 0.00029  | 1.99   | 0.00197  | conserved hypothetical protein                                                | <b>*</b> |
| CIMG_09749 | 4.14  | 2.35E-12 | 35.56  | 4.23E-53 | conserved hypothetical protein                                                |          |
| CIMG_09750 | 3.94  | 2.82E-08 | 2.01   | 0.03637  | cyclic peptide synthetase                                                     | <b>S</b> |
| CIMG_09751 | 22.88 | 4.40E-27 | 11.18  | 6.01E-15 | conserved hypothetical protein                                                |          |
| CIMG_09753 | 6.57  | 2.90E-09 | 2.69   | 0.00121  | ABC multidrug transporter                                                     |          |
| CIMG_09764 | 2.21  | 4.16E-06 | 3.06   | 2.00E-10 | ABC transporter                                                               |          |
| CIMG_09765 | 12.92 | 4.62E-39 | 9.18   | 2.01E-28 | oxidoreductase                                                                |          |
| CIMG_09793 | 1.78  | 0.00065  | 1.80   | 0.00123  | vesicle-associated membrane protein 712                                       |          |

\*: Predicted secreted;

+: Gene under positive selection [19]; G: Gene gained in Coccidioides [19]

H, S: Up-regulated in Hyphae or Spherule by microarray [18]

**Table S2: All genes up-regulated in parasitic phase**

|            |       |          |       |          |                                                                               |   |
|------------|-------|----------|-------|----------|-------------------------------------------------------------------------------|---|
| CIMG_09795 | 6.63  | 6.73E-09 | 4.33  | 9.93E-07 | conserved hypothetical protein                                                |   |
| CIMG_09796 | 2.12  | 1.19E-06 | 2.57  | 8.92E-09 | ura1                                                                          |   |
| CIMG_09798 | 1.68  | 0.00080  | 2.33  | 0.00001  | conserved hypothetical protein                                                |   |
| CIMG_09830 | 2.98  | 3.81E-11 | 2.85  | 1.57E-07 | conserved hypothetical protein                                                |   |
| CIMG_09894 | 5.38  | 3.91E-14 | 6.90  | 1.03E-16 | cytochrome P450                                                               |   |
| CIMG_09897 | 3.32  | 1.51E-14 | 2.35  | 3.26E-06 | conserved hypothetical protein (Thioesterase domain)                          |   |
| CIMG_09902 | 2.30  | 1.57E-07 | 4.11  | 1.23E-16 | conserved hypothetical protein (Phosphotransferase enzyme family)             |   |
| CIMG_09940 | 2.72  | 6.66E-09 | 2.28  | 0.00013  | conserved hypothetical protein                                                | + |
| CIMG_09960 | 1.66  | 0.00053  | 1.54  | 0.00508  | conserved hypothetical protein                                                |   |
| CIMG_09972 | 5.99  | 4.36E-20 | 7.19  | 9.58E-18 | DNA mismatch repair protein Msh4                                              |   |
| CIMG_09973 | 1.60  | 0.00056  | 1.80  | 0.00020  | WD repeat protein                                                             |   |
| CIMG_09978 | 2.80  | 5.21E-10 | 1.72  | 0.00802  | conserved hypothetical protein                                                |   |
| CIMG_09980 | 2.93  | 3.75E-10 | 1.92  | 0.00214  | DUF221 domain-containing protein                                              |   |
| CIMG_09990 | 10.56 | 9.39E-09 | 6.75  | 8.88E-08 | conserved hypothetical protein                                                |   |
| CIMG_09991 | 1.98  | 0.01436  | 6.97  | 4.19E-10 | conserved hypothetical protein                                                |   |
| CIMG_10000 | 8.35  | 1.44E-24 | 18.78 | 5.86E-31 | conserved hypothetical protein                                                |   |
| CIMG_10001 | 5.23  | 3.19E-08 | 2.45  | 0.01859  | conserved hypothetical protein                                                |   |
| CIMG_10002 | 2.79  | 5.84E-10 | 11.35 | 1.22E-33 | conserved hypothetical protein (F-box domain)                                 |   |
| CIMG_10013 | 10.25 | 3.10E-35 | 1.57  | 0.04276  | conserved hypothetical protein                                                |   |
| CIMG_10015 | 6.06  | 2.18E-06 | 6.97  | 1.92E-11 | conserved hypothetical protein                                                |   |
| CIMG_10020 | 2.66  | 1.30E-10 | 5.40  | 1.18E-18 | glutamate decarboxylase                                                       |   |
| CIMG_10022 | 2.81  | 8.98E-08 | 13.12 | 3.60E-30 | conserved hypothetical protein                                                |   |
| CIMG_10023 | 9.67  | 8.13E-15 | 6.19  | 1.67E-12 | conserved hypothetical protein                                                |   |
| CIMG_10026 | 2.08  | 3.50E-06 | 4.77  | 3.17E-15 | conserved hypothetical protein (DUF1687)                                      |   |
| CIMG_10027 | 2.39  | 1.04E-06 | 2.06  | 0.00009  | conserved hypothetical protein                                                |   |
| CIMG_10030 | 1.81  | 0.00103  | 1.74  | 0.01160  | fungal specific transcription factor domain-containing protein                |   |
| CIMG_10039 | 1.50  | 0.01532  | 4.63  | 6.60E-14 | short-chain dehydrogenase/reductase                                           |   |
| CIMG_10046 | 3.21  | 0.00143  | 3.54  | 0.00002  | hypothetical protein                                                          |   |
| CIMG_10050 | 2.11  | 0.00001  | 2.40  | 0.00003  | ankyrin repeat and BTB/POZ domain-containing protein                          |   |
| CIMG_10054 | 2.10  | 0.00001  | 1.70  | 0.00390  | conserved hypothetical protein                                                |   |
| CIMG_10055 | 2.79  | 6.58E-12 | 3.56  | 5.34E-11 | RNAse P Rpr2/Rpp21 subunit domain-containing protein                          |   |
| CIMG_10064 | 26.71 | 3.10E-54 | 3.93  | 1.43E-06 | conserved hypothetical protein                                                |   |
| CIMG_10086 | 2.54  | 1.01E-09 | 1.70  | 0.01505  | chitin synthase activator                                                     |   |
| CIMG_10094 | 5.05  | 1.15E-10 | 3.64  | 1.77E-06 | conserved hypothetical protein                                                |   |
| CIMG_10103 | 2.96  | 0.00011  | 1.87  | 0.03691  | serine/threonine protein kinase                                               |   |
| CIMG_10109 | 3.23  | 9.19E-13 | 1.55  | 0.03924  | alcohol dehydrogenase                                                         | S |
| CIMG_10112 | 2.70  | 1.22E-07 | 3.74  | 1.36E-10 | aromatic ring-opening dioxygenase LigB subunit                                |   |
| CIMG_10124 | 1.82  | 0.00063  | 2.05  | 0.00090  | RTA1 domain-containing protein                                                |   |
| CIMG_10133 | 3.94  | 1.73E-14 | 3.15  | 3.83E-08 | LCCL domain-containing protein                                                |   |
| CIMG_10144 | 1.84  | 0.00019  | 2.37  | 3.77E-06 | oxidoreductase (Aldehyde dehydrogenase family)                                |   |
| CIMG_10146 | 3.13  | 4.71E-10 | 5.14  | 9.89E-15 | conserved hypothetical protein                                                |   |
| CIMG_10163 | 2.25  | 2.48E-06 | 2.54  | 0.00002  | L-aminoadipate-semialdehyde dehydrogenase                                     |   |
| CIMG_10166 | 5.60  | 5.04E-18 | 5.68  | 3.78E-21 | pyoverdine/dityrosine biosynthesis family protein                             |   |
| CIMG_10169 | 3.05  | 1.77E-12 | 1.62  | 0.01221  | cell cycle checkpoint protein (Hus1-like protein)                             |   |
| CIMG_10172 | 1.44  | 0.02524  | 1.50  | 0.03559  | conserved hypothetical protein                                                |   |
| CIMG_10173 | 2.39  | 1.27E-06 | 2.11  | 0.00032  | conserved hypothetical protein (putative autophagocytosis associated protein) |   |
| CIMG_10180 | 2.20  | 9.91E-07 | 1.61  | 0.00625  | pheromone-dependent cell cycle arrest protein Far11                           |   |
| CIMG_10182 | 7.40  | 3.08E-30 | 2.05  | 0.00010  | conserved hypothetical protein                                                | G |
| CIMG_10185 | 2.85  | 7.37E-12 | 3.69  | 7.50E-12 | conserved hypothetical protein                                                |   |
| CIMG_10189 | 2.76  | 0.00115  | 3.60  | 0.00002  | conserved hypothetical protein                                                |   |
| CIMG_10204 | 2.26  | 7.97E-08 | 2.67  | 5.92E-08 | DUF28 domain-containing protein                                               |   |
| CIMG_10236 | 1.76  | 0.00022  | 1.53  | 0.01659  | mismatch-specific thymine-DNA glycosylase                                     |   |
| CIMG_10239 | 3.18  | 3.14E-11 | 2.13  | 0.00010  | NADPH oxidase                                                                 |   |
| CIMG_10240 | 2.98  | 0.00001  | 7.87  | 8.43E-15 | RNA binding protein                                                           |   |
| CIMG_10241 | 3.13  | 7.07E-15 | 11.02 | 2.25E-29 | conserved hypothetical protein (RhoGEF domain)                                |   |
| CIMG_10242 | 2.48  | 1.39E-09 | 2.29  | 9.12E-06 | 26S proteasome non-ATPase regulatory subunit Nas2                             |   |
| CIMG_10264 | 4.37  | 5.81E-12 | 67.65 | 2.20E-61 | aldehyde reductase                                                            | S |
| CIMG_10267 | 1.88  | 0.00006  | 2.24  | 9.84E-06 | cytochrome c oxidase assembly protein Cox19                                   |   |
| CIMG_10268 | 1.58  | 0.00239  | 2.01  | 0.00029  | RMD11                                                                         |   |
| CIMG_10269 | 3.00  | 2.09E-08 | 2.24  | 0.00073  | conserved hypothetical protein                                                |   |
| CIMG_10270 | 2.06  | 0.00001  | 1.80  | 0.00271  | La domain-containing protein                                                  |   |
| CIMG_10277 | 1.54  | 0.00366  | 2.17  | 4.42E-06 | mitochondrial inner membrane translocase subunit TIM44                        |   |
| CIMG_10282 | 4.52  | 1.27E-14 | 8.04  | 7.86E-24 | conserved hypothetical protein                                                |   |
| CIMG_10285 | 1.80  | 0.00490  | 2.19  | 0.00066  | conserved hypothetical protein                                                |   |
| CIMG_10294 | 1.82  | 0.00005  | 2.16  | 0.00001  | conserved hypothetical protein (Fungal Zn(2)-Cys(6) binuclear cluster domain) |   |
| CIMG_10302 | 1.96  | 0.00002  | 2.47  | 3.98E-06 | conserved hypothetical protein                                                |   |
| CIMG_10304 | 3.04  | 2.92E-13 | 7.14  | 1.71E-27 | conserved hypothetical protein                                                |   |
| CIMG_10307 | 4.66  | 0.00001  | 9.63  | 4.09E-16 | hypothetical protein                                                          |   |
| CIMG_10317 | 1.86  | 0.00003  | 2.45  | 3.70E-07 | integral membrane protein (Mpv17/PMP22 family)                                |   |
| CIMG_10318 | 2.14  | 0.00058  | 2.18  | 0.00129  | phosphoglycerate kinase 1                                                     |   |
| CIMG_10434 | 15.70 | 2.15E-15 | 5.47  | 1.83E-09 | conserved hypothetical protein                                                |   |
| CIMG_10440 | 2.24  | 5.84E-08 | 2.01  | 0.00008  | conserved hypothetical protein                                                |   |
| CIMG_10463 | 1.40  | 0.03164  | 14.71 | 1.23E-31 | DUF1212 domain membrane protein Prm10                                         |   |
| CIMG_10467 | 3.48  | 0.00565  | 3.20  | 0.00001  | conserved hypothetical protein                                                |   |
| CIMG_10471 | 2.81  | 0.00685  | 3.16  | 0.00017  | hypothetical protein                                                          |   |
| CIMG_10478 | 3.25  | 1.00E-06 | 3.88  | 0.00182  | hypothetical protein                                                          |   |
| CIMG_10488 | 11.99 | 2.36E-15 | 24.18 | 6.41E-18 | conserved hypothetical protein                                                |   |
| CIMG_10492 | 4.21  | 0.00001  | 2.89  | 0.00008  | hypothetical protein                                                          |   |

\*: Predicted secreted;

+: Gene under positive selection [19]; G: Gene gained in Coccidioides [19]

H, S: Up-regulated in Hyphae or Spherule by microarray [18]

**Table S2: All genes up-regulated in parasitic phase**

|            |       |          |       |          |                                                               |   |
|------------|-------|----------|-------|----------|---------------------------------------------------------------|---|
| CIMG_10494 | 5.59  | 1.62E-22 | 1.93  | 0.00022  | conserved hypothetical protein                                |   |
| CIMG_10499 | 5.83  | 3.21E-16 | 4.23  | 5.67E-09 | carboxypeptidase S1                                           | * |
| CIMG_10500 | 2.06  | 0.00016  | 4.44  | 1.73E-09 | hypothetical protein                                          |   |
| CIMG_10503 | 2.70  | 9.25E-07 | 9.53  | 6.55E-26 | RNA binding protein MSSP-2                                    |   |
| CIMG_10505 | 11.43 | 1.05E-20 | 6.12  | 1.77E-11 | hypothetical protein                                          |   |
| CIMG_10508 | 2.99  | 0.00001  | 2.24  | 0.00393  | hypothetical protein                                          |   |
| CIMG_10516 | 1.54  | 0.04858  | 2.41  | 1.40E-06 | hypothetical protein                                          |   |
| CIMG_10521 | 4.52  | 1.90E-12 | 5.55  | 2.20E-10 | hypothetical protein                                          |   |
| CIMG_10537 | 2.96  | 1.56E-07 | 2.09  | 0.02775  | hypothetical protein                                          |   |
| CIMG_10588 | 3.55  | 1.01E-11 | 2.30  | 6.05E-06 | alpha/beta hydrolase                                          |   |
| CIMG_10589 | 3.36  | 3.55E-11 | 3.20  | 2.34E-07 | LYR family protein                                            |   |
| CIMG_10605 | 1.90  | 0.00908  | 2.51  | 0.01547  | hypothetical protein                                          |   |
| CIMG_10608 | 2.98  | 0.00002  | 2.07  | 0.00630  | hypothetical protein                                          |   |
| CIMG_10613 | 4.23  | 3.86E-10 | 1.95  | 0.00120  | conserved hypothetical protein                                |   |
| CIMG_10628 | 2.16  | 0.00006  | 6.08  | 2.15E-20 | integral membrane protein                                     |   |
| CIMG_10637 | 7.51  | 5.72E-20 | 10.89 | 3.63E-27 | hypothetical protein                                          |   |
| CIMG_10638 | 2.42  | 0.01326  | 2.29  | 0.00009  | hypothetical protein                                          |   |
| CIMG_10641 | 2.29  | 0.00610  | 2.31  | 0.00092  | hypothetical protein                                          |   |
| CIMG_10662 | 1.83  | 0.00114  | 1.81  | 0.00084  | hypothetical protein                                          |   |
| CIMG_10666 | 1.78  | 0.00504  | 4.08  | 7.76E-13 | conserved hypothetical protein                                |   |
| CIMG_10670 | 15.39 | 5.01E-12 | 20.01 | 1.95E-20 | hypothetical protein                                          |   |
| CIMG_10675 | 2.02  | 0.00570  | 3.75  | 1.57E-06 | hypothetical protein                                          |   |
| CIMG_10682 | 3.53  | 9.85E-08 | 6.12  | 4.13E-10 | hypothetical protein                                          |   |
| CIMG_10697 | 2.90  | 4.90E-08 | 6.07  | 1.13E-14 | conserved hypothetical protein                                |   |
| CIMG_10704 | 5.70  | 1.13E-06 | 2.21  | 0.02157  | hypothetical protein                                          |   |
| CIMG_10709 | 7.56  | 2.79E-10 | 3.59  | 0.00002  | hypothetical protein                                          |   |
| CIMG_10710 | 3.24  | 1.25E-09 | 2.79  | 1.26E-07 | hypothetical protein                                          |   |
| CIMG_10727 | 5.14  | 1.16E-15 | 2.49  | 0.00017  | hypothetical protein                                          |   |
| CIMG_10730 | 3.83  | 1.11E-07 | 2.18  | 0.00545  | hypothetical protein                                          |   |
| CIMG_10738 | 1.55  | 0.03215  | 3.80  | 3.30E-09 | conserved hypothetical protein                                |   |
| CIMG_10740 | 5.68  | 8.08E-17 | 8.66  | 3.60E-11 | hypothetical protein                                          |   |
| CIMG_10751 | 1.78  | 0.00040  | 1.67  | 0.00121  | conserved hypothetical protein (putative membrane protein)    |   |
| CIMG_10769 | 4.30  | 0.00011  | 5.35  | 1.06E-07 | hypothetical protein                                          |   |
| CIMG_10785 | 3.33  | 4.09E-12 | 4.09  | 2.73E-12 | hypothetical protein                                          |   |
| CIMG_10791 | 3.20  | 3.52E-06 | 6.00  | 3.06E-06 | phosphotransferase enzyme family protein                      |   |
| CIMG_10796 | 4.80  | 2.04E-10 | 7.47  | 4.44E-13 | hypothetical protein                                          |   |
| CIMG_10799 | 1.94  | 0.00002  | 1.60  | 0.01950  | conserved hypothetical protein                                |   |
| CIMG_10801 | 3.12  | 0.00140  | 3.21  | 0.00007  | hypothetical protein                                          |   |
| CIMG_10810 | 1.98  | 0.00002  | 2.11  | 0.00005  | conserved hypothetical protein (Ran-interacting Mog1 protein) |   |
| CIMG_10815 | 4.03  | 4.03E-09 | 3.64  | 8.24E-07 | phosphotransferase enzyme family protein                      |   |
| CIMG_10824 | 6.05  | 5.24E-16 | 4.52  | 6.27E-08 | hypothetical protein                                          |   |
| CIMG_10832 | 2.22  | 4.02E-07 | 1.77  | 0.00501  | acyl-CoA oxidase                                              |   |
| CIMG_10838 | 3.38  | 0.00005  | 6.42  | 3.75E-09 | hypothetical protein                                          |   |
| CIMG_10845 | 1.61  | 0.00212  | 1.51  | 0.02571  | hypothetical protein                                          |   |
| CIMG_10859 | 2.16  | 0.00349  | 2.91  | 0.00007  | hypothetical protein                                          |   |
| CIMG_10861 | 3.67  | 3.16E-08 | 5.09  | 4.27E-11 | hypothetical protein                                          |   |
| CIMG_10866 | 2.44  | 0.00920  | 3.61  | 0.00229  | conserved hypothetical protein                                |   |
| CIMG_10871 | 2.07  | 0.00070  | 2.59  | 0.00010  | conserved hypothetical protein (TBP-1 interacting protein)    |   |
| CIMG_10873 | 4.10  | 1.64E-12 | 2.99  | 2.82E-08 | conserved hypothetical protein                                |   |
| CIMG_10884 | 2.46  | 0.00257  | 11.05 | 2.70E-17 | hypothetical protein                                          |   |
| CIMG_10887 | 3.48  | 7.10E-12 | 3.62  | 3.37E-09 | conserved hypothetical protein                                |   |
| CIMG_10891 | 12.47 | 5.74E-35 | 6.25  | 2.38E-21 | hypothetical protein                                          |   |
| CIMG_10901 | 2.22  | 0.00586  | 3.09  | 0.00009  | hypothetical protein                                          |   |
| CIMG_10902 | 2.47  | 5.71E-09 | 2.15  | 3.98E-06 | conserved hypothetical protein                                |   |
| CIMG_10917 | 4.05  | 9.62E-09 | 3.23  | 2.42E-07 | conserved hypothetical protein                                |   |
| CIMG_10938 | 1.90  | 0.00115  | 1.84  | 0.02528  | MFS drug efflux transporter                                   |   |
| CIMG_10940 | 3.33  | 0.00008  | 15.75 | 2.94E-30 | hypothetical protein                                          | * |
| CIMG_10941 | 1.92  | 0.00036  | 5.26  | 1.02E-10 | hypothetical protein                                          |   |
| CIMG_10944 | 2.55  | 6.79E-07 | 4.33  | 3.67E-14 | conserved hypothetical protein                                |   |
| CIMG_10955 | 2.97  | 1.29E-07 | 2.85  | 0.00001  | hypothetical protein                                          | + |
| CIMG_10966 | 10.95 | 5.07E-14 | 5.19  | 1.06E-08 | protein phosphatase 2C                                        |   |
| CIMG_10973 | 2.25  | 0.00015  | 3.31  | 8.46E-07 | conserved hypothetical protein                                |   |
| CIMG_10974 | 9.93  | 1.49E-10 | 8.09  | 1.15E-08 | hypothetical protein                                          |   |
| CIMG_10980 | 6.14  | 8.12E-07 | 4.84  | 0.00011  | hypothetical protein                                          |   |
| CIMG_10997 | 1.63  | 0.00139  | 1.80  | 0.00268  | leucyl-tRNA synthetase                                        |   |
| CIMG_11001 | 2.55  | 0.00029  | 2.85  | 0.00037  | hypothetical protein                                          |   |
| CIMG_11002 | 1.84  | 0.00554  | 2.74  | 2.85E-07 | short chain dehydrogenase/reductase                           |   |
| CIMG_11008 | 8.99  | 8.36E-11 | 7.01  | 5.74E-07 | hypothetical protein                                          |   |
| CIMG_11011 | 18.37 | 2.44E-12 | 10.99 | 1.13E-08 | hypothetical protein                                          |   |
| CIMG_11036 | 1.85  | 0.00005  | 2.07  | 0.00010  | glutathione S-transferase                                     |   |
| CIMG_11038 | 5.96  | 2.57E-20 | 12.03 | 1.24E-18 | hypothetical protein                                          |   |
| CIMG_11060 | 9.83  | 6.50E-08 | 6.64  | 7.45E-07 | hypothetical protein                                          |   |
| CIMG_11064 | 3.61  | 3.84E-16 | 2.06  | 7.91E-06 | pyridine nucleotide-disulphide oxidoreductase                 |   |
| CIMG_11069 | 9.76  | 1.24E-30 | 2.80  | 7.49E-08 | hypothetical protein                                          |   |
| CIMG_11081 | 3.54  | 8.34E-08 | 4.26  | 4.22E-07 | hypothetical protein                                          |   |
| CIMG_11087 | 11.23 | 4.08E-20 | 11.85 | 1.87E-18 | hypothetical protein                                          |   |
| CIMG_11094 | 3.98  | 1.26E-07 | 4.76  | 7.00E-07 | hypothetical protein                                          |   |
| CIMG_11098 | 5.03  | 0.00006  | 4.64  | 0.00017  | hypothetical protein                                          |   |
| CIMG_11118 | 4.66  | 4.90E-08 | 4.95  | 1.91E-07 | hypothetical protein                                          |   |
| CIMG_11130 | 1.66  | 0.00683  | 2.47  | 0.00007  | hypothetical protein                                          |   |

\*: Predicted secreted;

+: Gene under positive selection [19]; G: Gene gained in Coccidioides [19]

H, S: Up-regulated in Hyphae or Spherule by microarray [18]

**Table S2: All genes up-regulated in parasitic phase**

|            |       |          |       |          |                                                                                                |   |
|------------|-------|----------|-------|----------|------------------------------------------------------------------------------------------------|---|
| CIMG_11132 | 3.87  | 0.00046  | 4.27  | 2.55E-06 | hypothetical protein                                                                           |   |
| CIMG_11137 | 4.88  | 3.76E-13 | 3.91  | 1.07E-07 | hypothetical protein                                                                           |   |
| CIMG_11147 | 1.36  | 0.03354  | 2.17  | 0.00002  | cyclin                                                                                         |   |
| CIMG_11151 | 3.52  | 3.86E-08 | 1.90  | 0.00951  | conserved hypothetical protein                                                                 |   |
| CIMG_11156 | 4.75  | 1.21E-13 | 3.34  | 0.00003  | conserved hypothetical protein                                                                 |   |
| CIMG_11166 | 1.51  | 0.01337  | 2.13  | 0.00019  | FHA domain-containing protein SNIP1                                                            |   |
| CIMG_11170 | 1.68  | 0.00064  | 5.43  | 2.35E-23 | hypothetical protein                                                                           |   |
| CIMG_11192 | 3.65  | 5.40E-08 | 4.69  | 7.79E-07 | hypothetical protein                                                                           |   |
| CIMG_11202 | 3.57  | 1.50E-06 | 4.44  | 7.51E-09 | hypothetical protein                                                                           |   |
| CIMG_11203 | 30.77 | 1.04E-47 | 15.56 | 2.20E-36 | hypothetical protein                                                                           |   |
| CIMG_11213 | 1.97  | 0.00004  | 2.81  | 3.17E-11 | integral membrane protein                                                                      |   |
| CIMG_11218 | 2.85  | 8.80E-11 | 2.01  | 0.00040  | hypothetical protein                                                                           | * |
| CIMG_11219 | 1.53  | 0.01699  | 3.51  | 2.94E-08 | hypothetical protein                                                                           |   |
| CIMG_11220 | 5.05  | 1.28E-12 | 5.20  | 5.22E-11 | conserved hypothetical protein                                                                 |   |
| CIMG_11224 | 2.34  | 0.00468  | 3.55  | 0.00959  | hypothetical protein                                                                           |   |
| CIMG_11231 | 1.80  | 0.00005  | 2.37  | 2.17E-07 | tRNA splicing 2' phosphotransferase 1                                                          |   |
| CIMG_11244 | 1.79  | 0.00078  | 1.97  | 0.00069  | conserved hypothetical protein                                                                 |   |
| CIMG_11246 | 2.50  | 0.00011  | 9.32  | 6.44E-10 | hypothetical protein                                                                           |   |
| CIMG_11251 | 2.76  | 0.00071  | 4.68  | 7.59E-06 | hypothetical protein                                                                           |   |
| CIMG_11266 | 2.30  | 0.03021  | 2.37  | 0.04272  | hypothetical protein                                                                           |   |
| CIMG_11290 | 1.86  | 0.00212  | 1.72  | 0.04540  | hypothetical protein                                                                           |   |
| CIMG_11294 | 1.81  | 0.00190  | 1.55  | 0.01607  | conserved hypothetical protein                                                                 |   |
| CIMG_11295 | 3.55  | 3.24E-14 | 2.64  | 1.18E-07 | conserved hypothetical protein (Methyltransferase domain)                                      |   |
| CIMG_11297 | 5.60  | 2.78E-12 | 48.13 | 2.13E-32 | hypothetical protein                                                                           |   |
| CIMG_11301 | 1.69  | 0.00200  | 2.16  | 0.00025  | conserved hypothetical protein (putative glutathione-dependent formaldehyde-activating enzyme) |   |
| CIMG_11309 | 5.60  | 2.84E-16 | 7.04  | 1.14E-17 | beta-N-acetylglucosaminidase                                                                   | S |
| CIMG_11317 | 6.53  | 1.57E-07 | 8.54  | 8.55E-09 | conserved hypothetical protein                                                                 |   |
| CIMG_11321 | 3.00  | 3.88E-07 | 2.09  | 0.00380  | hypothetical protein                                                                           |   |
| CIMG_11323 | 1.71  | 0.00016  | 1.46  | 0.04898  | FYVE zinc finger protein                                                                       |   |
| CIMG_11324 | 2.34  | 0.00220  | 14.14 | 5.33E-14 | hypothetical protein                                                                           |   |
| CIMG_11342 | 4.77  | 1.30E-13 | 4.45  | 7.27E-10 | hypothetical protein                                                                           |   |
| CIMG_11343 | 2.29  | 0.03329  | 6.91  | 1.28E-06 | hypothetical protein                                                                           |   |
| CIMG_11344 | 2.04  | 0.00152  | 2.61  | 0.00078  | hypothetical protein                                                                           |   |
| CIMG_11345 | 3.28  | 9.90E-07 | 3.88  | 0.01286  | hypothetical protein                                                                           |   |
| CIMG_11347 | 2.08  | 0.00008  | 1.98  | 0.00264  | hypothetical protein                                                                           |   |
| CIMG_11349 | 3.12  | 0.00005  | 7.76  | 3.42E-08 | conserved hypothetical protein                                                                 |   |
| CIMG_11360 | 2.76  | 3.65E-06 | 2.90  | 0.00066  | conserved hypothetical protein                                                                 |   |
| CIMG_11374 | 6.95  | 5.75E-14 | 7.02  | 1.35E-17 | conserved hypothetical protein (FAD binding domain, Berberine and berberine like)              | * |
| CIMG_11395 | 1.55  | 0.01909  | 2.35  | 0.00028  | hypothetical protein                                                                           |   |
| CIMG_11408 | 3.18  | 0.00001  | 8.04  | 5.77E-11 | hypothetical protein                                                                           |   |
| CIMG_11416 | 12.14 | 3.21E-35 | 2.50  | 0.00003  | conserved hypothetical protein (FAD binding domain, Thi4 family)                               |   |
| CIMG_11422 | 1.85  | 0.00007  | 1.89  | 0.00123  | C2H2 transcription factor                                                                      |   |
| CIMG_11436 | 2.30  | 0.00541  | 3.19  | 0.00007  | hypothetical protein (2OG-Fe(II) oxygenase superfamily)                                        |   |
| CIMG_11443 | 2.90  | 1.19E-07 | 2.52  | 0.00002  | hypothetical protein                                                                           | * |
| CIMG_11456 | 3.27  | 9.16E-15 | 3.75  | 4.44E-12 | conserved hypothetical protein                                                                 |   |
| CIMG_11458 | 1.43  | 0.01577  | 1.75  | 0.00442  | alpha/beta hydrolase                                                                           |   |
| CIMG_11460 | 1.43  | 0.01346  | 5.97  | 4.10E-20 | hypothetical protein                                                                           |   |
| CIMG_11463 | 3.51  | 0.00005  | 3.11  | 0.00037  | hypothetical protein                                                                           |   |
| CIMG_11491 | 3.46  | 6.47E-08 | 1.92  | 0.03933  | conserved hypothetical protein (meiosis protein SPO22/ZIP4-like)                               |   |
| CIMG_11520 | 16.05 | 2.23E-41 | 13.16 | 2.84E-22 | hypothetical protein                                                                           |   |
| CIMG_11522 | 10.23 | 1.16E-26 | 46.44 | 1.83E-64 | hypothetical protein                                                                           |   |
| CIMG_11523 | 7.69  | 2.28E-30 | 8.90  | 1.02E-31 | hypothetical protein                                                                           |   |
| CIMG_11529 | 2.01  | 0.00005  | 3.27  | 1.17E-08 | phospholipase A2                                                                               | * |
| CIMG_11534 | 6.03  | 2.74E-16 | 8.03  | 7.31E-18 | hypothetical protein                                                                           |   |
| CIMG_11535 | 3.14  | 2.74E-06 | 2.94  | 9.67E-07 | hypothetical protein                                                                           |   |
| CIMG_11536 | 1.63  | 0.00341  | 1.68  | 0.00278  | plasma membrane antiporter                                                                     |   |
| CIMG_11543 | 4.42  | 5.28E-09 | 9.66  | 1.24E-22 | conserved hypothetical protein                                                                 |   |
| CIMG_11545 | 2.27  | 0.00001  | 1.53  | 0.00333  | fructose-2,6-bisphosphatase                                                                    |   |
| CIMG_11550 | 3.67  | 1.13E-10 | 2.21  | 0.00004  | hypothetical protein                                                                           |   |
| CIMG_11551 | 10.87 | 2.87E-09 | 11.35 | 9.80E-09 | hypothetical protein                                                                           |   |
| CIMG_11552 | 2.37  | 2.35E-08 | 2.31  | 3.25E-07 | hypothetical protein                                                                           |   |
| CIMG_11553 | 3.53  | 3.98E-08 | 4.63  | 4.14E-11 | hypothetical protein                                                                           |   |
| CIMG_11555 | 4.04  | 2.86E-13 | 1.76  | 0.02951  | conserved hypothetical protein                                                                 |   |
| CIMG_11556 | 3.98  | 0.00004  | 4.80  | 1.36E-08 | hypothetical protein                                                                           |   |
| CIMG_11557 | 14.47 | 7.14E-31 | 6.16  | 4.83E-10 | hypothetical protein                                                                           |   |
| CIMG_11558 | 2.17  | 4.74E-06 | 3.91  | 2.42E-14 | conserved hypothetical protein                                                                 |   |
| CIMG_11561 | 4.57  | 3.78E-06 | 5.54  | 3.65E-13 | sucrase/ferredoxin domain-containing protein                                                   |   |
| CIMG_11587 | 1.82  | 0.00378  | 2.34  | 0.00019  | conserved hypothetical protein                                                                 |   |
| CIMG_11589 | 1.76  | 0.01125  | 2.01  | 0.00893  | conserved hypothetical protein                                                                 |   |
| CIMG_11604 | 2.15  | 2.01E-06 | 2.02  | 0.00004  | GNAT family acetyltransferase                                                                  |   |
| CIMG_11607 | 3.84  | 1.72E-15 | 2.47  | 3.82E-06 | hypothetical protein                                                                           |   |
| CIMG_11625 | 2.12  | 0.03156  | 1.66  | 0.03000  | conserved hypothetical protein (glycosyl hydrolase family 20 catalytic domain)                 |   |
| CIMG_11639 | 1.46  | 0.01479  | 1.83  | 0.00013  | mitochondrial outer membrane protein                                                           |   |
| CIMG_11650 | 4.39  | 0.00029  | 4.36  | 0.00080  | hypothetical protein                                                                           |   |
| CIMG_11655 | 6.03  | 1.78E-19 | 12.17 | 6.57E-23 | conserved hypothetical protein                                                                 |   |
| CIMG_11657 | 2.07  | 0.00164  | 4.49  | 9.21E-11 | hypothetical protein                                                                           |   |
| CIMG_11663 | 7.33  | 2.39E-20 | 2.27  | 0.00197  | hypothetical protein                                                                           |   |

\*: Predicted secreted;

+: Gene under positive selection [19]; G: Gene gained in Coccidioides [19]

H, S: Up-regulated in Hyphae or Spherule by microarray [18]

**Table S2: All genes up-regulated in parasitic phase**

|            |       |          |       |          |                                                                 |          |
|------------|-------|----------|-------|----------|-----------------------------------------------------------------|----------|
| CIMG_11664 | 5.82  | 1.85E-24 | 8.64  | 4.84E-36 | hypothetical protein                                            |          |
| CIMG_11682 | 2.82  | 1.16E-09 | 2.96  | 2.47E-08 | inositol 5-phosphatase                                          |          |
| CIMG_11698 | 4.71  | 0.00001  | 6.86  | 4.52E-20 | hypothetical protein                                            |          |
| CIMG_11714 | 9.41  | 1.87E-20 | 1.90  | 0.02019  | hypothetical protein                                            |          |
| CIMG_11718 | 2.41  | 8.68E-09 | 2.16  | 0.00001  | conserved hypothetical protein                                  |          |
| CIMG_11719 | 3.76  | 6.65E-12 | 4.25  | 4.97E-11 | trehalose synthase                                              | <b>S</b> |
| CIMG_11723 | 2.40  | 0.00182  | 7.73  | 5.26E-24 | hypothetical protein                                            |          |
| CIMG_11727 | 1.58  | 0.00329  | 3.33  | 9.35E-12 | NADH-ubiquinone oxidoreductase 78 kDa subunit                   |          |
| CIMG_11728 | 6.79  | 1.49E-19 | 9.04  | 1.33E-19 | hypothetical protein                                            |          |
| CIMG_11738 | 2.30  | 1.41E-08 | 1.43  | 0.00363  | MATH and UCH domain-containing protein                          |          |
| CIMG_11742 | 6.68  | 5.19E-22 | 4.92  | 8.47E-13 | hypothetical protein                                            |          |
| CIMG_11755 | 2.33  | 0.00001  | 3.07  | 2.65E-08 | conserved hypothetical protein                                  |          |
| CIMG_11766 | 2.32  | 0.00053  | 7.73  | 1.37E-16 | hypothetical protein                                            | *        |
| CIMG_11791 | 4.44  | 2.38E-07 | 5.14  | 0.00012  | hypothetical protein                                            |          |
| CIMG_11800 | 1.53  | 0.01659  | 1.54  | 0.04899  | metalloproteinase 5                                             | *        |
| CIMG_11809 | 2.13  | 6.51E-07 | 8.77  | 3.58E-20 | sister chromatid cohesion protein                               |          |
| CIMG_11845 | 1.85  | 0.00018  | 1.65  | 0.01268  | RNA binding protein                                             |          |
| CIMG_11847 | 3.62  | 6.49E-10 | 10.05 | 5.46E-17 | hypothetical protein                                            |          |
| CIMG_11875 | 2.00  | 0.00416  | 3.22  | 7.68E-06 | conserved hypothetical protein                                  | *        |
| CIMG_11895 | 1.76  | 0.00009  | 4.84  | 2.85E-16 | conserved hypothetical protein                                  | *        |
| CIMG_11896 | 2.86  | 2.36E-07 | 2.06  | 0.01034  | conserved hypothetical protein (Beta-lactamase)                 |          |
| CIMG_11899 | 5.56  | 5.19E-21 | 2.39  | 9.44E-06 | conserved hypothetical protein                                  |          |
| CIMG_11902 | 3.78  | 7.33E-09 | 2.09  | 0.01421  | hypothetical protein                                            |          |
| CIMG_11913 | 1.78  | 0.00250  | 2.32  | 0.00088  | hypothetical protein                                            |          |
| CIMG_11915 | 1.50  | 0.00617  | 1.47  | 0.01156  | WD repeat protein                                               |          |
| CIMG_11931 | 4.69  | 1.65E-21 | 3.53  | 5.92E-12 | FK506 suppressor Sfk1                                           | *        |
| CIMG_11944 | 1.47  | 0.04970  | 2.35  | 0.00068  | hypothetical protein                                            |          |
| CIMG_11953 | 2.78  | 0.00011  | 2.53  | 0.00378  | hypothetical protein                                            |          |
| CIMG_11986 | 4.00  | 0.00006  | 2.47  | 0.00016  | hypothetical protein                                            |          |
| CIMG_12013 | 3.16  | 6.55E-13 | 3.32  | 1.67E-10 | conserved hypothetical protein                                  |          |
| CIMG_12018 | 3.77  | 3.48E-14 | 1.90  | 0.00335  | ubiE/COQ5 methyltransferase                                     |          |
| CIMG_12027 | 7.11  | 7.05E-12 | 14.41 | 1.33E-21 | hypothetical protein                                            | *        |
| CIMG_12045 | 3.91  | 0.00003  | 4.61  | 0.02002  | hypothetical protein                                            |          |
| CIMG_12050 | 3.23  | 2.91E-12 | 1.60  | 0.00914  | hypothetical protein                                            |          |
| CIMG_12068 | 7.56  | 1.08E-27 | 5.67  | 1.19E-22 | multicopper oxidase                                             | *        |
| CIMG_12069 | 1.57  | 0.00256  | 2.84  | 2.14E-10 | long-chain fatty acid transporter                               | *        |
| CIMG_12088 | 3.38  | 3.22E-10 | 4.34  | 1.42E-11 | hypothetical protein                                            |          |
| CIMG_12089 | 3.59  | 3.86E-08 | 5.38  | 5.37E-06 | hypothetical protein                                            |          |
| CIMG_12111 | 2.00  | 0.00001  | 1.41  | 0.03718  | DNA damage-inducible protein 1                                  |          |
| CIMG_12142 | 6.53  | 1.04E-20 | 2.66  | 0.00001  | hypothetical protein                                            |          |
| CIMG_12143 | 8.89  | 5.83E-09 | 8.62  | 5.31E-10 | hypothetical protein                                            |          |
| CIMG_12198 | 1.96  | 0.03954  | 2.08  | 0.00431  | conserved hypothetical protein                                  |          |
| CIMG_12203 | 6.63  | 1.54E-25 | 7.11  | 3.99E-33 | hypothetical protein                                            |          |
| CIMG_12204 | 2.88  | 5.07E-11 | 3.63  | 3.81E-14 | hypothetical protein                                            |          |
| CIMG_12244 | 3.35  | 2.23E-06 | 2.16  | 0.00135  | conserved hypothetical protein                                  |          |
| CIMG_12252 | 3.53  | 0.00003  | 6.63  | 0.00001  | hypothetical protein                                            |          |
| CIMG_12263 | 2.99  | 0.00038  | 2.49  | 0.01304  | hypothetical protein                                            |          |
| CIMG_12264 | 3.28  | 9.34E-08 | 4.02  | 1.65E-07 | hypothetical protein                                            |          |
| CIMG_12272 | 6.34  | 2.07E-21 | 12.28 | 1.09E-32 | hypothetical protein                                            |          |
| CIMG_12285 | 2.76  | 5.86E-12 | 4.44  | 8.44E-08 | hypothetical protein                                            |          |
| CIMG_12292 | 2.13  | 4.79E-06 | 1.38  | 0.03563  | AP-3 adaptor complex subunit beta                               |          |
| CIMG_12303 | 1.87  | 0.00069  | 1.58  | 0.01024  | phthalate transporter                                           |          |
| CIMG_12310 | 7.36  | 5.94E-25 | 4.87  | 2.35E-12 | hypothetical protein                                            |          |
| CIMG_12314 | 3.46  | 1.30E-08 | 1.90  | 0.01807  | hypothetical protein                                            | *        |
| CIMG_12341 | 9.95  | 5.05E-22 | 4.84  | 1.37E-08 | hypothetical protein                                            |          |
| CIMG_12343 | 1.52  | 0.03100  | 1.86  | 0.00996  | conserved hypothetical protein (zinc-binding dehydrogenase)     |          |
| CIMG_12358 | 11.35 | 1.60E-37 | 13.09 | 2.53E-18 | hypothetical protein                                            |          |
| CIMG_12361 | 4.32  | 6.45E-20 | 1.56  | 0.04188  | conserved hypothetical protein (GDP/GTP exchange factor Sec2p)  |          |
| CIMG_12383 | 2.44  | 0.00176  | 2.44  | 0.00013  | hypothetical protein                                            |          |
| CIMG_12387 | 13.56 | 1.18E-34 | 12.05 | 5.79E-20 | hypothetical protein                                            |          |
| CIMG_12388 | 3.75  | 2.08E-11 | 2.83  | 8.72E-07 | hypothetical protein                                            |          |
| CIMG_12390 | 4.41  | 0.00098  | 4.38  | 8.79E-06 | hypothetical protein                                            |          |
| CIMG_12394 | 7.85  | 6.00E-11 | 4.98  | 6.84E-08 | hypothetical protein                                            |          |
| CIMG_12395 | 2.07  | 1.92E-06 | 2.59  | 9.10E-07 | copper amine oxidase                                            |          |
| CIMG_12396 | 4.25  | 2.94E-20 | 10.15 | 8.95E-34 | UV-endonuclease UVE-1                                           |          |
| CIMG_12404 | 2.54  | 9.76E-07 | 2.68  | 0.00002  | conserved hypothetical protein                                  | <b>S</b> |
| CIMG_12411 | 1.76  | 0.00023  | 5.72  | 5.24E-25 | acetamidase                                                     |          |
| CIMG_12424 | 3.86  | 6.75E-16 | 3.97  | 2.98E-10 | hypothetical protein                                            | *        |
| CIMG_12427 | 1.54  | 0.01659  | 4.33  | 9.65E-12 | hypothetical protein                                            |          |
| CIMG_12441 | 2.46  | 0.00021  | 3.78  | 7.29E-07 | hypothetical protein                                            |          |
| CIMG_12456 | 3.31  | 6.64E-10 | 2.18  | 0.00016  | hypothetical protein                                            |          |
| CIMG_12470 | 2.47  | 0.00037  | 2.64  | 0.00167  | hypothetical protein                                            |          |
| CIMG_12472 | 2.67  | 9.39E-10 | 7.73  | 4.89E-20 | conserved hypothetical protein (SCP-like extracellular protein) | *        |
| CIMG_12485 | 2.21  | 0.03726  | 13.63 | 5.22E-16 | hypothetical protein                                            |          |
| CIMG_12499 | 2.82  | 0.00824  | 7.58  | 2.11E-11 | hypothetical protein                                            |          |
| CIMG_12501 | 3.33  | 0.00005  | 7.42  | 2.10E-15 | conserved hypothetical protein                                  |          |
| CIMG_12513 | 1.51  | 0.01197  | 2.18  | 0.00017  | hypothetical protein                                            |          |
| CIMG_12515 | 2.04  | 0.00788  | 7.48  | 1.38E-14 | hypothetical protein                                            |          |
| CIMG_12529 | 2.01  | 3.44E-06 | 2.63  | 1.25E-07 | conserved hypothetical protein                                  |          |
| CIMG_12534 | 1.77  | 0.00140  | 6.32  | 7.97E-23 | conserved hypothetical protein                                  |          |

\*: Predicted secreted;

+: Gene under positive selection [19]; G: Gene gained in Coccidioides [19]

H, S: Up-regulated in Hyphae or Spherule by microarray [18]

**Table S2: All genes up-regulated in parasitic phase**

|            |       |          |       |          |                                                                                 |   |
|------------|-------|----------|-------|----------|---------------------------------------------------------------------------------|---|
| CIMG_12535 | 3.24  | 3.25E-10 | 1.99  | 0.00561  | conserved hypothetical protein                                                  |   |
| CIMG_12537 | 6.56  | 5.22E-09 | 3.40  | 0.00359  | hypothetical protein                                                            |   |
| CIMG_12539 | 2.01  | 2.52E-06 | 3.56  | 4.63E-13 | DUF636 domain-containing protein                                                |   |
| CIMG_12569 | 17.87 | 1.63E-11 | 6.79  | 1.11E-19 | C2H2 finger domain-containing protein                                           |   |
| CIMG_12621 | 2.60  | 0.00003  | 2.32  | 0.00028  | hypothetical protein                                                            |   |
| CIMG_12635 | 15.36 | 2.22E-09 | 1.80  | 0.00006  | conserved hypothetical protein (protein kinase domain)                          |   |
| CIMG_12643 | 2.40  | 8.92E-10 | 4.36  | 1.22E-13 | hypothetical protein                                                            |   |
| CIMG_12656 | 1.80  | 0.02208  | 3.17  | 6.01E-06 | conserved hypothetical protein                                                  |   |
| CIMG_12659 | 2.21  | 0.00319  | 2.15  | 0.00810  | hypothetical protein                                                            |   |
| CIMG_12670 | 1.46  | 0.03016  | 2.37  | 3.43E-06 | hypothetical protein                                                            |   |
| CIMG_12671 | 2.86  | 0.00396  | 4.32  | 0.00003  | conserved hypothetical protein                                                  | * |
| CIMG_12690 | 6.76  | 1.58E-09 | 3.33  | 0.00007  | conserved hypothetical protein                                                  |   |
| CIMG_12707 | 2.45  | 2.09E-08 | 2.98  | 6.74E-08 | conserved hypothetical protein                                                  |   |
| CIMG_12714 | 2.46  | 4.23E-10 | 2.54  | 0.00002  | conserved hypothetical protein                                                  |   |
| CIMG_12724 | 2.56  | 5.38E-07 | 2.20  | 5.91E-06 | hypothetical protein                                                            |   |
| CIMG_12727 | 2.21  | 0.02098  | 2.90  | 0.01902  | conserved hypothetical protein                                                  |   |
| CIMG_12738 | 3.30  | 7.05E-12 | 2.27  | 0.00088  | conserved hypothetical protein                                                  |   |
| CIMG_12739 | 1.82  | 0.04597  | 3.14  | 0.00185  | conserved hypothetical protein                                                  |   |
| CIMG_12741 | 2.54  | 1.49E-06 | 3.34  | 5.62E-09 | hypothetical protein                                                            |   |
| CIMG_12745 | 3.34  | 1.15E-06 | 3.50  | 1.07E-06 | hypothetical protein                                                            |   |
| CIMG_12746 | 2.66  | 0.00006  | 2.26  | 0.02138  | conserved hypothetical protein                                                  |   |
| CIMG_12747 | 6.93  | 8.08E-14 | 23.12 | 3.40E-27 | hypothetical protein                                                            |   |
| CIMG_12749 | 2.92  | 1.10E-07 | 2.06  | 0.00145  | conserved hypothetical protein                                                  |   |
| CIMG_12752 | 2.85  | 3.77E-07 | 4.72  | 1.54E-08 | conserved hypothetical protein                                                  | * |
| CIMG_12758 | 3.17  | 9.77E-09 | 3.41  | 1.96E-09 | FluG domain-containing protein                                                  |   |
| CIMG_12760 | 1.48  | 0.00795  | 2.60  | 5.09E-08 | conserved hypothetical protein                                                  |   |
| CIMG_12761 | 1.31  | 0.04198  | 16.38 | 4.66E-48 | conserved hypothetical protein (putative heat shock protein 9/12)               |   |
| CIMG_12764 | 7.23  | 6.40E-08 | 4.06  | 0.00174  | hypothetical protein                                                            |   |
| CIMG_12770 | 2.14  | 6.74E-08 | 4.61  | 6.01E-19 | conserved hypothetical protein                                                  |   |
| CIMG_12774 | 1.77  | 0.00241  | 2.66  | 0.00004  | hypothetical protein                                                            |   |
| CIMG_12778 | 3.19  | 5.78E-08 | 2.04  | 0.00264  | conserved hypothetical protein                                                  |   |
| CIMG_12779 | 2.04  | 0.00045  | 3.59  | 2.14E-09 | hypothetical protein                                                            |   |
| CIMG_12782 | 4.69  | 3.72E-21 | 2.45  | 0.00059  | conserved hypothetical protein                                                  |   |
| CIMG_12786 | 3.92  | 1.94E-06 | 1.85  | 0.03832  | hypothetical protein                                                            |   |
| CIMG_12788 | 3.20  | 0.00351  | 3.38  | 0.00002  | hypothetical protein                                                            |   |
| CIMG_12789 | 5.12  | 8.42E-19 | 2.62  | 0.00009  | conserved hypothetical protein                                                  |   |
| CIMG_12791 | 3.31  | 0.00005  | 4.25  | 0.00003  | conserved hypothetical protein                                                  |   |
| CIMG_12795 | 2.32  | 0.03113  | 5.01  | 1.84E-06 | conserved hypothetical protein                                                  |   |
| CIMG_12798 | 3.47  | 0.00002  | 5.09  | 2.27E-06 | conserved hypothetical protein                                                  |   |
| CIMG_12802 | 4.52  | 3.80E-16 | 2.58  | 0.00028  | conserved hypothetical protein                                                  |   |
| CIMG_12807 | 2.20  | 0.00089  | 5.61  | 1.19E-10 | hypothetical protein                                                            |   |
| CIMG_12812 | 3.22  | 4.80E-14 | 25.90 | 1.40E-53 | conserved hypothetical protein                                                  |   |
| CIMG_12822 | 45.40 | 1.34E-60 | 16.71 | 5.54E-45 | conserved hypothetical protein                                                  |   |
| CIMG_12831 | 6.08  | 2.41E-20 | 6.36  | 2.13E-19 | conserved hypothetical protein                                                  |   |
| CIMG_12835 | 2.21  | 0.00468  | 5.29  | 6.12E-10 | hypothetical protein                                                            |   |
| CIMG_12837 | 1.69  | 0.01382  | 2.58  | 0.00395  | hypothetical protein                                                            |   |
| CIMG_12839 | 1.74  | 0.00991  | 2.22  | 0.01607  | conserved hypothetical protein                                                  |   |
| CIMG_12841 | 2.59  | 7.62E-07 | 3.17  | 0.00002  | hypothetical protein                                                            |   |
| CIMG_12852 | 4.80  | 7.60E-14 | 1.99  | 0.00884  | conserved hypothetical protein                                                  |   |
| CIMG_12862 | 3.75  | 3.09E-11 | 2.99  | 0.00019  | hypothetical protein                                                            |   |
| CIMG_12868 | 3.93  | 3.80E-06 | 2.77  | 0.00406  | hypothetical protein                                                            |   |
| CIMG_12869 | 1.60  | 0.00106  | 1.90  | 0.00002  | hypothetical protein                                                            |   |
| CIMG_12877 | 6.16  | 2.32E-10 | 2.61  | 0.00001  | hypothetical protein                                                            |   |
| CIMG_12879 | 5.16  | 1.24E-06 | 6.06  | 7.79E-07 | conserved hypothetical protein                                                  |   |
| CIMG_12880 | 2.59  | 0.00001  | 2.83  | 0.00003  | conserved hypothetical protein                                                  |   |
| CIMG_12886 | 5.43  | 5.31E-09 | 4.12  | 0.00007  | hypothetical protein                                                            |   |
| CIMG_12887 | 6.01  | 3.03E-24 | 9.01  | 3.90E-31 | glutathione S-transferase omega-like 2                                          |   |
| CIMG_12892 | 6.50  | 4.64E-06 | 5.55  | 8.48E-08 | hypothetical protein                                                            | * |
| CIMG_12894 | 5.04  | 4.20E-08 | 4.04  | 1.38E-07 | conserved hypothetical protein                                                  |   |
| CIMG_12895 | 3.10  | 2.30E-06 | 4.93  | 2.31E-08 | conserved hypothetical protein                                                  |   |
| CIMG_12898 | 2.87  | 6.44E-08 | 2.67  | 4.71E-06 | hypothetical protein                                                            |   |
| CIMG_12903 | 3.28  | 8.13E-07 | 8.22  | 2.88E-13 | hypothetical protein                                                            | * |
| CIMG_12904 | 2.07  | 0.00990  | 2.47  | 0.00005  | hypothetical protein                                                            |   |
| CIMG_12905 | 2.85  | 5.50E-07 | 3.23  | 1.55E-07 | conserved hypothetical protein                                                  | * |
| CIMG_12906 | 2.74  | 1.12E-07 | 30.55 | 2.76E-30 | hypothetical protein                                                            |   |
| CIMG_12946 | 4.30  | 0.00001  | 4.43  | 0.00006  | hypothetical protein                                                            |   |
| CIMG_12963 | 2.53  | 3.82E-09 | 1.73  | 0.00311  | vacuolar protein sorting protein                                                |   |
| CIMG_12964 | 1.54  | 0.04794  | 2.19  | 0.00099  | hypothetical protein                                                            |   |
| CIMG_12965 | 2.08  | 0.00126  | 2.84  | 0.00004  | hypothetical protein                                                            |   |
| CIMG_12966 | 5.45  | 0.00002  | 1.98  | 0.02605  | conserved hypothetical protein                                                  |   |
| CIMG_12968 | 3.39  | 2.99E-12 | 2.66  | 3.34E-08 | conserved hypothetical protein                                                  |   |
| CIMG_12969 | 3.84  | 1.32E-11 | 2.19  | 0.00012  | conserved hypothetical protein                                                  |   |
| CIMG_12973 | 1.66  | 0.04195  | 2.18  | 0.02786  | hypothetical protein                                                            |   |
| CIMG_12974 | 5.16  | 3.73E-09 | 6.57  | 3.73E-08 | hypothetical protein                                                            |   |
| CIMG_12980 | 2.42  | 0.00599  | 2.07  | 0.00916  | conserved hypothetical protein                                                  |   |
| CIMG_12981 | 1.66  | 0.00056  | 5.76  | 8.16E-21 | conserved hypothetical protein (methyl-CpG binding domain-containing protein 4) |   |
| CIMG_12987 | 69.58 | 2.14E-32 | 5.76  | 6.37E-06 | conserved hypothetical protein                                                  |   |
| CIMG_12992 | 1.97  | 0.00586  | 1.93  | 0.01510  | hypothetical protein                                                            |   |
| CIMG_13013 | 1.82  | 0.00407  | 3.51  | 0.00001  | hypothetical protein                                                            |   |

\*: Predicted secreted;

+: Gene under positive selection [19]; G: Gene gained in Coccidioides [19]

H, S: Up-regulated in Hyphae or Spherule by microarray [18]

**Table S2: All genes up-regulated in parasitic phase**

|            |       |          |       |          |                                                                                                                   |   |
|------------|-------|----------|-------|----------|-------------------------------------------------------------------------------------------------------------------|---|
| CIMG_13014 | 3.50  | 0.00002  | 3.32  | 0.00151  | hypothetical protein                                                                                              |   |
| CIMG_13015 | 2.68  | 8.23E-07 | 2.21  | 0.00033  | hypothetical protein                                                                                              |   |
| CIMG_13018 | 5.96  | 0.00005  | 2.84  | 0.04708  | conserved hypothetical protein                                                                                    |   |
| CIMG_13019 | 2.45  | 1.94E-07 | 1.65  | 0.00902  | hypothetical protein (C2H2 type zinc finger)                                                                      |   |
| CIMG_13022 | 6.82  | 5.99E-09 | 3.81  | 0.00007  | hypothetical protein                                                                                              |   |
| CIMG_13025 | 5.50  | 2.24E-08 | 9.01  | 1.60E-09 | hypothetical protein                                                                                              |   |
| CIMG_13031 | 1.69  | 0.02658  | 2.49  | 0.00333  | hypothetical protein                                                                                              |   |
| CIMG_13049 | 2.66  | 0.00003  | 6.49  | 3.55E-12 | hypothetical protein                                                                                              |   |
| CIMG_13061 | 3.03  | 6.87E-07 | 2.74  | 0.00015  | hypothetical protein                                                                                              |   |
| CIMG_13079 | 3.08  | 7.96E-07 | 2.06  | 0.00081  | conserved hypothetical protein (DUF1037)                                                                          |   |
| CIMG_13082 | 6.29  | 3.65E-16 | 7.95  | 2.39E-16 | hypothetical protein                                                                                              | * |
| CIMG_13083 | 3.40  | 2.38E-07 | 4.71  | 4.40E-09 | hypothetical protein                                                                                              |   |
| CIMG_13084 | 27.58 | 1.10E-50 | 30.90 | 8.17E-47 | conserved hypothetical protein                                                                                    |   |
| CIMG_13085 | 3.63  | 3.58E-13 | 4.25  | 2.82E-17 | hypothetical protein                                                                                              |   |
| CIMG_13092 | 4.14  | 6.03E-18 | 4.55  | 4.97E-14 | succinyl-CoA ligase, alpha-chain (SUCLG1)                                                                         |   |
| CIMG_13098 | 1.36  | 0.02417  | 2.72  | 7.29E-09 | hypothetical protein                                                                                              |   |
| CIMG_13110 | 6.10  | 1.70E-23 | 3.26  | 1.95E-10 | conserved hypothetical protein                                                                                    |   |
| CIMG_13111 | 5.26  | 3.36E-14 | 4.91  | 1.18E-11 | hypothetical protein                                                                                              |   |
| CIMG_13119 | 3.69  | 1.34E-11 | 2.15  | 0.01051  | hypothetical protein                                                                                              |   |
| CIMG_13121 | 3.70  | 1.38E-07 | 2.80  | 0.00057  | hypothetical protein                                                                                              |   |
| CIMG_13134 | 1.93  | 3.51E-06 | 2.73  | 6.48E-12 | hypothetical protein                                                                                              |   |
| CIMG_13136 | 9.29  | 2.04E-11 | 7.21  | 1.72E-09 | conserved hypothetical protein                                                                                    |   |
| CIMG_13137 | 2.04  | 0.00382  | 2.27  | 0.01051  | conserved hypothetical protein                                                                                    |   |
| CIMG_13160 | 13.30 | 2.46E-36 | 1.76  | 0.00139  | C6 zinc finger domain-containing protein                                                                          |   |
| CIMG_13163 | 4.04  | 1.36E-09 | 3.90  | 4.37E-09 | conserved hypothetical protein (putative DNA mismatch repair protein)                                             |   |
| CIMG_13179 | 1.90  | 0.01862  | 4.03  | 0.00002  | hypothetical protein                                                                                              |   |
| CIMG_13180 | 8.51  | 1.29E-11 | 2.89  | 0.00010  | conserved hypothetical protein                                                                                    |   |
| CIMG_13183 | 2.21  | 0.00239  | 2.49  | 0.00484  | conserved hypothetical protein                                                                                    |   |
| CIMG_13191 | 2.52  | 0.00052  | 4.78  | 2.24E-07 | conserved hypothetical protein                                                                                    |   |
| CIMG_13199 | 11.43 | 7.54E-19 | 7.01  | 1.67E-10 | hypothetical protein                                                                                              |   |
| CIMG_13254 | 3.31  | 0.00001  | 1.63  | 0.01062  | hypothetical protein                                                                                              |   |
| CIMG_13255 | 2.25  | 4.11E-06 | 1.99  | 0.00002  | 3-isopropylmalate dehydratase                                                                                     |   |
| CIMG_13256 | 1.93  | 0.00004  | 1.60  | 0.01751  | alpha-1,3-glucan synthase                                                                                         | * |
| CIMG_13257 | 4.40  | 2.45E-20 | 5.27  | 1.25E-20 | hypothetical protein                                                                                              |   |
| CIMG_13258 | 2.80  | 0.00202  | 4.02  | 0.00002  | hypothetical protein                                                                                              |   |
| CIMG_13259 | 3.96  | 7.31E-07 | 7.61  | 3.54E-08 | hypothetical protein                                                                                              | * |
| CIMG_13263 | 5.66  | 0.00001  | 3.01  | 0.01197  | hypothetical protein                                                                                              |   |
| CIMG_13264 | 2.37  | 0.00027  | 1.77  | 0.00999  | hypothetical protein                                                                                              |   |
| CIMG_13271 | 3.44  | 2.23E-07 | 8.21  | 2.14E-14 | conserved hypothetical protein                                                                                    |   |
| CIMG_13273 | 6.91  | 8.44E-19 | 8.47  | 1.33E-15 | conserved hypothetical protein                                                                                    |   |
| CIMG_13280 | 5.04  | 1.39E-19 | 7.05  | 4.62E-18 | hypothetical protein                                                                                              |   |
| CIMG_13281 | 2.74  | 0.00001  | 3.01  | 0.00024  | hypothetical protein                                                                                              |   |
| CIMG_13282 | 3.17  | 9.94E-07 | 4.60  | 4.87E-10 | hypothetical protein                                                                                              |   |
| CIMG_13283 | 3.15  | 0.00052  | 8.23  | 3.31E-13 | hypothetical protein                                                                                              |   |
| CIMG_13286 | 4.19  | 2.82E-11 | 3.57  | 1.66E-09 | conserved hypothetical protein                                                                                    |   |
| CIMG_13287 | 3.90  | 1.54E-07 | 2.57  | 0.00965  | conserved hypothetical protein                                                                                    |   |
| CIMG_13291 | 1.68  | 0.02558  | 1.94  | 0.04075  | conserved hypothetical protein                                                                                    |   |
| CIMG_13292 | 1.79  | 0.02072  | 1.97  | 0.03060  | hypothetical protein                                                                                              |   |
| CIMG_13293 | 2.83  | 1.01E-09 | 5.02  | 1.08E-15 | hypothetical protein                                                                                              | * |
| CIMG_13294 | 3.50  | 0.00005  | 3.27  | 0.00003  | hypothetical protein                                                                                              |   |
| CIMG_13295 | 1.84  | 0.00383  | 2.28  | 0.00017  | glycosyl hydrolase                                                                                                |   |
| CIMG_13311 | 3.91  | 2.52E-14 | 2.56  | 5.41E-06 | hypothetical protein                                                                                              |   |
| CIMG_13313 | 8.14  | 7.14E-07 | 6.39  | 0.00004  | hypothetical protein                                                                                              |   |
| CIMG_13314 | 10.91 | 3.43E-09 | 7.12  | 6.06E-07 | hypothetical protein                                                                                              |   |
| CIMG_13316 | 6.45  | 1.10E-21 | 16.37 | 1.71E-36 | hypothetical protein                                                                                              |   |
| CIMG_13320 | 2.53  | 0.00011  | 2.57  | 0.00947  | hypothetical protein                                                                                              |   |
| CIMG_13321 | 6.13  | 5.95E-11 | 6.89  | 7.02E-12 | conserved hypothetical protein                                                                                    |   |
| CIMG_13323 | 5.29  | 3.05E-06 | 3.27  | 0.00620  | hypothetical protein                                                                                              |   |
| CIMG_13324 | 4.12  | 5.34E-08 | 3.81  | 0.00001  | hypothetical protein                                                                                              |   |
| CIMG_13325 | 2.15  | 0.00075  | 5.09  | 3.91E-10 | hypothetical protein                                                                                              |   |
| CIMG_13329 | 1.87  | 0.00042  | 1.85  | 0.00937  | hypothetical protein                                                                                              | * |
| CIMG_13330 | 4.66  | 3.58E-07 | 6.42  | 8.74E-07 | hypothetical protein                                                                                              |   |
| CIMG_13334 | 2.28  | 9.19E-08 | 2.09  | 0.00003  | conserved hypothetical protein                                                                                    |   |
| CIMG_13354 | 5.30  | 4.35E-13 | 5.14  | 1.71E-09 | hypothetical protein                                                                                              |   |
| CIMG_13357 | 6.64  | 3.49E-25 | 2.75  | 1.69E-08 | conserved hypothetical protein                                                                                    |   |
| CIMG_13358 | 4.22  | 2.84E-15 | 6.07  | 1.75E-21 | conserved hypothetical protein                                                                                    |   |
| CIMG_13360 | 7.29  | 7.94E-28 | 69.94 | 7.29E-83 | conserved hypothetical protein                                                                                    |   |
| CIMG_13362 | 2.99  | 0.00013  | 3.76  | 6.05E-06 | hypothetical protein                                                                                              |   |
| CIMG_13363 | 3.49  | 0.00021  | 9.80  | 2.46E-07 | conserved hypothetical protein                                                                                    |   |
| CIMG_13365 | 2.15  | 0.00195  | 7.72  | 4.67E-17 | hypothetical protein                                                                                              |   |
| CIMG_13367 | 3.34  | 0.00004  | 8.10  | 1.22E-06 | hypothetical protein                                                                                              |   |
| CIMG_13370 | 2.95  | 0.00002  | 1.85  | 0.02119  | conserved hypothetical protein (Fungal Zn(2)-Cys(6) binuclear cluster domain, homeobox-associated leucine zipper) |   |
| CIMG_13372 | 2.15  | 0.04836  | 5.29  | 6.11E-06 | conserved hypothetical protein                                                                                    |   |
| CIMG_13380 | 1.99  | 0.03468  | 3.46  | 3.14E-06 | hypothetical protein                                                                                              |   |
| CIMG_13384 | 13.81 | 1.19E-41 | 9.57  | 7.80E-22 | hypothetical protein                                                                                              |   |
| CIMG_13388 | 5.60  | 2.65E-18 | 7.64  | 6.83E-17 | hypothetical protein                                                                                              |   |
| CIMG_13389 | 13.94 | 2.11E-10 | 5.62  | 1.75E-07 | hypothetical protein                                                                                              |   |
| CIMG_13395 | 4.22  | 4.91E-14 | 2.10  | 0.00419  | hypothetical protein                                                                                              |   |
| CIMG_13396 | 2.10  | 0.00269  | 4.75  | 1.67E-08 | hypothetical protein                                                                                              |   |

\*: Predicted secreted;

+: Gene under positive selection [19]; G: Gene gained in Coccidioides [19]

H, S: Up-regulated in Hyphae or Spherule by microarray [18]

**Table S2: All genes up-regulated in parasitic phase**

|            |       |          |       |          |                                                                              |   |
|------------|-------|----------|-------|----------|------------------------------------------------------------------------------|---|
| CIMG_13398 | 3.71  | 0.00001  | 1.77  | 0.02814  | hypothetical protein                                                         |   |
| CIMG_13402 | 3.13  | 2.17E-10 | 2.13  | 0.00002  | conserved hypothetical protein                                               |   |
| CIMG_13407 | 2.84  | 3.87E-06 | 2.04  | 0.00529  | hypothetical protein                                                         |   |
| CIMG_13408 | 3.14  | 0.00002  | 2.28  | 0.00315  | hypothetical protein                                                         |   |
| CIMG_13411 | 5.72  | 1.40E-18 | 2.85  | 0.00011  | conserved hypothetical protein                                               |   |
| CIMG_13414 | 3.28  | 0.00002  | 6.25  | 1.36E-09 | conserved hypothetical protein                                               |   |
| CIMG_13417 | 5.34  | 5.27E-09 | 5.45  | 2.26E-06 | conserved hypothetical protein                                               |   |
| CIMG_13420 | 4.79  | 0.00191  | 6.59  | 0.00003  | conserved hypothetical protein                                               |   |
| CIMG_13421 | 4.47  | 5.51E-10 | 7.96  | 5.68E-15 | conserved hypothetical protein                                               |   |
| CIMG_13444 | 4.71  | 0.00001  | 3.44  | 3.66E-07 | conserved hypothetical protein                                               |   |
| CIMG_13445 | 2.63  | 1.25E-08 | 4.40  | 1.08E-15 | hypothetical protein                                                         |   |
| CIMG_13464 | 1.76  | 0.00018  | 1.71  | 0.00355  | cAMP-dependent protein kinase type 2                                         |   |
| CIMG_13473 | 1.65  | 0.00104  | 2.12  | 0.00064  | YjgH family protein                                                          |   |
| CIMG_13476 | 3.62  | 7.40E-14 | 2.69  | 1.24E-06 | MFS monosaccharide transporter                                               |   |
| CIMG_13478 | 2.56  | 2.42E-11 | 2.20  | 0.00001  | hypothetical protein                                                         |   |
| CIMG_13497 | 21.11 | 2.88E-13 | 8.10  | 5.66E-09 | conserved hypothetical protein                                               |   |
| CIMG_13502 | 3.03  | 4.49E-07 | 2.99  | 1.89E-07 | hypothetical protein                                                         |   |
| CIMG_13504 | 5.66  | 4.15E-12 | 10.08 | 4.60E-24 | hypothetical protein                                                         |   |
| CIMG_13526 | 2.26  | 0.00012  | 2.37  | 0.00020  | molybdenum cofactor biosynthetic protein                                     |   |
| CIMG_13529 | 2.50  | 0.02437  | 5.84  | 4.07E-09 | conserved hypothetical protein                                               |   |
| CIMG_13531 | 8.03  | 4.36E-27 | 6.37  | 6.84E-14 | conserved hypothetical protein                                               |   |
| CIMG_13532 | 2.81  | 0.00078  | 2.42  | 0.03354  | hypothetical protein                                                         |   |
| CIMG_13533 | 3.89  | 0.00001  | 4.95  | 4.49E-07 | conserved hypothetical protein                                               |   |
| CIMG_13535 | 2.65  | 0.00171  | 7.57  | 4.80E-13 | conserved hypothetical protein                                               |   |
| CIMG_13551 | 2.25  | 0.00122  | 10.99 | 4.26E-19 | conserved hypothetical protein                                               |   |
| CIMG_13569 | 2.49  | 0.00005  | 1.99  | 0.00145  | hypothetical protein                                                         |   |
| CIMG_13570 | 1.98  | 0.00703  | 1.91  | 0.00872  | hypothetical protein                                                         |   |
| CIMG_13571 | 2.57  | 0.00001  | 8.36  | 2.65E-16 | hypothetical protein                                                         |   |
| CIMG_13572 | 4.11  | 3.91E-06 | 18.65 | 2.15E-51 | conserved hypothetical protein (CVNH domain)                                 | * |
| CIMG_13573 | 12.78 | 1.49E-26 | 10.66 | 2.67E-19 | hypothetical protein                                                         |   |
| CIMG_13575 | 4.07  | 9.24E-17 | 1.57  | 0.00469  | conserved hypothetical protein                                               |   |
| CIMG_13576 | 3.32  | 0.00034  | 5.20  | 0.00002  | hypothetical protein                                                         |   |
| CIMG_13581 | 26.29 | 7.78E-52 | 11.52 | 1.38E-20 | hypothetical protein                                                         |   |
| CIMG_13582 | 6.60  | 4.76E-14 | 7.43  | 5.74E-12 | hypothetical protein                                                         |   |
| CIMG_13586 | 1.62  | 0.01619  | 2.98  | 1.74E-06 | conserved hypothetical protein                                               |   |
| CIMG_13590 | 2.15  | 0.00011  | 1.96  | 0.00981  | conserved hypothetical protein (fungal specific transcription factor domain) |   |
| CIMG_13592 | 1.77  | 0.00014  | 2.21  | 0.00001  | pseudouridine synthase                                                       |   |
| CIMG_13600 | 4.09  | 1.15E-07 | 2.37  | 0.01674  | hypothetical protein                                                         |   |
| CIMG_13603 | 5.66  | 2.19E-09 | 5.01  | 9.24E-09 | conserved hypothetical protein                                               |   |
| CIMG_13604 | 5.18  | 4.67E-09 | 4.60  | 1.18E-06 | hypothetical protein                                                         |   |
| CIMG_13605 | 4.28  | 0.00022  | 5.71  | 1.61E-08 | hypothetical protein                                                         |   |
| CIMG_13611 | 3.08  | 0.00003  | 2.29  | 0.00081  | conserved hypothetical protein                                               |   |
| CIMG_13613 | 2.38  | 0.02785  | 3.90  | 0.00072  | conserved hypothetical protein                                               |   |
| CIMG_13614 | 3.08  | 0.00001  | 2.21  | 0.02179  | hypothetical protein                                                         |   |
| CIMG_13616 | 2.56  | 0.00005  | 3.44  | 1.40E-06 | hypothetical protein                                                         |   |
| CIMG_13617 | 3.00  | 8.14E-11 | 2.06  | 0.00001  | conserved hypothetical protein                                               |   |
| CIMG_13619 | 2.33  | 0.03800  | 3.20  | 2.74E-06 | conserved hypothetical protein                                               |   |
| CIMG_13620 | 3.63  | 3.54E-06 | 2.95  | 0.00023  | hypothetical protein                                                         |   |
| CIMG_13631 | 2.54  | 0.02811  | 4.63  | 0.00002  | hypothetical protein                                                         |   |
| CIMG_13674 | 2.23  | 0.00060  | 2.50  | 0.00003  | hypothetical protein                                                         |   |
| CIMG_13679 | 2.51  | 0.00001  | 3.15  | 5.79E-09 | hypothetical protein                                                         |   |
| CIMG_13680 | 9.44  | 3.70E-14 | 3.86  | 7.68E-08 | conserved hypothetical protein                                               |   |
| CIMG_13682 | 3.84  | 8.46E-10 | 4.99  | 4.91E-07 | hypothetical protein                                                         |   |
| CIMG_13687 | 2.16  | 0.00032  | 4.18  | 3.30E-14 | hypothetical protein                                                         |   |
| CIMG_13690 | 2.00  | 0.00158  | 2.01  | 0.01066  | hypothetical protein                                                         |   |
| CIMG_13693 | 1.51  | 0.02358  | 2.05  | 0.00085  | tRNA(His) guanylyltransferase                                                |   |
| CIMG_13696 | 9.75  | 7.92E-19 | 21.20 | 5.41E-35 | hypothetical protein                                                         |   |
| CIMG_13698 | 3.92  | 6.63E-13 | 6.55  | 9.65E-27 | conserved hypothetical protein                                               |   |
| CIMG_13701 | 4.15  | 0.00010  | 6.51  | 1.01E-08 | hypothetical protein                                                         |   |
| CIMG_13703 | 6.74  | 3.18E-06 | 3.53  | 0.00007  | conserved hypothetical protein                                               |   |
| CIMG_13706 | 2.63  | 4.18E-10 | 2.14  | 3.77E-06 | alpha-1,2-mannosyltransferase                                                | S |
| CIMG_13708 | 2.52  | 1.04E-09 | 27.12 | 6.77E-64 | conserved hypothetical protein                                               |   |
| CIMG_13712 | 4.11  | 0.00002  | 5.13  | 0.00003  | conserved hypothetical protein                                               |   |
| CIMG_13718 | 1.55  | 0.02192  | 2.25  | 0.00100  | hypothetical protein                                                         |   |
| CIMG_13721 | 4.33  | 1.02E-08 | 2.39  | 0.00266  | hypothetical protein                                                         | * |
| CIMG_13724 | 4.23  | 2.19E-07 | 4.01  | 0.00004  | hypothetical protein                                                         |   |
| CIMG_13726 | 3.34  | 4.45E-08 | 1.91  | 0.01633  | hypothetical protein                                                         |   |
| CIMG_13729 | 2.68  | 0.00128  | 2.58  | 0.00288  | hypothetical protein                                                         | * |
| CIMG_13733 | 2.94  | 4.29E-06 | 11.71 | 8.32E-11 | hypothetical protein                                                         |   |
| CIMG_13740 | 6.21  | 3.02E-15 | 1.99  | 0.00180  | hypothetical protein                                                         |   |
| CIMG_13741 | 5.92  | 1.92E-09 | 6.63  | 6.76E-14 | conserved hypothetical protein                                               |   |
| CIMG_13743 | 8.91  | 7.08E-08 | 5.54  | 9.56E-07 | hypothetical protein                                                         |   |
| CIMG_13746 | 4.72  | 0.00001  | 5.21  | 0.00001  | conserved hypothetical protein                                               |   |
| CIMG_13748 | 6.62  | 8.43E-14 | 6.36  | 8.55E-13 | hypothetical protein                                                         |   |
| CIMG_13752 | 2.33  | 0.00050  | 5.00  | 6.34E-09 | hypothetical protein                                                         |   |
| CIMG_13757 | 7.88  | 2.14E-20 | 16.19 | 8.45E-42 | hypothetical protein                                                         |   |
| CIMG_13758 | 3.60  | 0.00001  | 3.60  | 0.00002  | hypothetical protein                                                         |   |
| CIMG_13763 | 2.08  | 0.01252  | 2.50  | 0.00062  | hypothetical protein                                                         |   |
| CIMG_13766 | 2.45  | 1.54E-06 | 3.11  | 8.22E-10 | glutamate/Leucine/Phenylalanine/Valine dehydrogenase                         |   |
| CIMG_13767 | 5.64  | 9.84E-21 | 4.51  | 1.28E-12 | hypothetical protein                                                         |   |

\*: Predicted secreted;

+: Gene under positive selection [19]; G: Gene gained in Coccidioides [19]

H, S: Up-regulated in Hyphae or Spherule by microarray [18]



**Table S2: All genes up-regulated in parasitic phase**

|            |      |         |      |          |                                |  |
|------------|------|---------|------|----------|--------------------------------|--|
| CIMG_13768 | 2.45 | 0.00003 | 2.11 | 0.01732  | conserved hypothetical protein |  |
| CIMG_13770 | 1.98 | 0.00032 | 2.88 | 1.46E-07 | dihydroceramide delta          |  |
| CIMG_13780 | 1.84 | 0.00641 | 1.79 | 0.01017  | conserved hypothetical protein |  |

\*: Predicted secreted;  
+: Gene under positive selection [19]; G: Gene gained in Coccidioides [19]  
H, S: Up-regulated in Hyphae or Spherule by microarray [18]
